# Supplementary material for: One pot cascade synthesis of fused heterocycles from furan-tethered terminal alkynes and aldehydes in the presence of amines and CuBr
Source: Royal Society of Chemistry journal article supplement (doi:10.1039/c5qo00033e), 2015-01-01
Supplement: c5qo00033e1.pdf [file c5qo00033e1.pdf]

## Supporting information

# One-Pot Cascade Synthesis of Fused Heterocycles from Furan-tethered Terminal Alkynes and Aldehydes in the Presence of Amines and CuBr

Yan-Yan Zhang,<sup>†</sup> Jian Hao,<sup>†</sup> Min Shi<sup>‡,\*</sup>

<sup>†</sup> Department of Chemistry, Shanghai University, 99 Shangda Road, Shanghai 200444, China

<sup>‡</sup> State Key Laboratory of Organometallic Chemistry, Shanghai Institute of Organic Chemistry, Chinese Academy of Sciences, 345 Lingling Road, Shanghai 200032, China

## CONTENTS

|                                                                                                                          |         |
|--------------------------------------------------------------------------------------------------------------------------|---------|
| 1. General remarks.....                                                                                                  | S2      |
| 2. General procedure for synthesis of substrates <b>1</b> and their characterization.....                                | S2-S10  |
| 3. General procedure for synthesis of substrates <b>4</b> and their characterization.....                                | S11-S16 |
| 4. General procedure for synthesis of <b>2</b> , <b>3</b> , <b>5</b> and <b>7</b> as well as their characterization..... | S16-S48 |
| 5. X-ray crystallographic information of <b>2a</b> , <b>3a</b> and <b>5a</b> .....                                       | S49-S51 |
| 6. References.....                                                                                                       | S52     |

**1. General Remarks.** All reagents were obtained commercially and used without further purification. Toluene was distilled from sodium (Na) under argon (Ar) atmosphere. Organic solvents used were dried by standard methods when necessary. Unless otherwise noted, all reaction mixtures were stirred with a magnetic stir bar in flame-dried glassware under argon atmosphere. All the temperatures were referred to the used oil baths. Extracts were dried over MgSO<sub>4</sub> or Na<sub>2</sub>SO<sub>4</sub> and solvents were removed in a rotary evaporator. TLC analysis of reaction mixtures was performed on Huanghai GF<sub>254</sub> silica gel coated plates. Flash column chromatography was carried out using 300-400 mesh silica gel under increased pressure. MP was obtained with a Yanagimoto micro melting point apparatus and is uncorrected. Infra-red spectra were measured on a spectrometer. <sup>1</sup>H NMR spectra were recorded for solution in CDCl<sub>3</sub> with tetramethylsilane (TMS) as internal standard. *J*-values are in Hz. Mass and HRMS spectra were recorded by EI, ESI, or MALDI method.

## 2. General procedure for synthesis of substrates 1.

**Scheme 1** Representative procedure: synthesis of **1**.

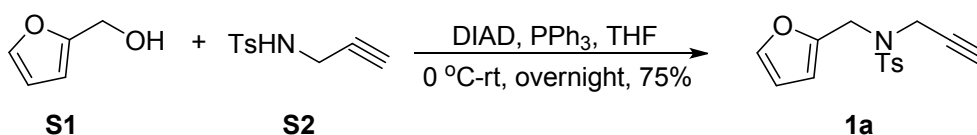

This compound was prepared by a procedure reported by Hsung.<sup>[1]</sup> To a 100 mL flame and vacuum dried flask was added furfuryl alcohol **S1** (1.08 g, 11 mmol), *N*-propargyl tosyl amine **S2** (2.09 g, 10 mmol), triphenylphosphine (2.88 g, 11 mmol), and anhydrous THF (11 mL) under Ar. Then, DIAD (2.17 mL, 11 mmol) was added dropwise at 0 °C and the resulting solution was warmed to room temperature and stirred overnight. When the reaction was complete as monitored by TLC, the solution was concentrated under reduced pressure and the crude residue was purified via silica gel flash column chromatography (PE/EA = 15/1) affording propargyl amide **1a** (2.18 g, 7.55 mmol) in 75% yield.

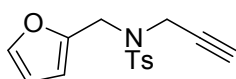

### ***N*-(furan-2-ylmethyl)-4-methyl-*N*-(prop-2-yn-1-yl) benzenesulfonamide **1a****

A white solid, 75% yield (2.18 g). M.p.: 67-69 °C. <sup>1</sup>H NMR (CDCl<sub>3</sub>, TMS, 400 MHz) δ 2.08 (t, *J* = 2.4 Hz, 1H, CH), 2.42 (s, 3H, CH<sub>3</sub>), 4.01 (d, *J* = 2.4 Hz, 2H, CH<sub>2</sub>), 4.43 (s, 2H, CH<sub>2</sub>), 6.30 (s, 2H, ArH), 7.28 (d, *J* = 8.0 Hz, 2H, ArH), 7.33 (s, 1H, ArH), 7.73 (d, *J* = 8.0 Hz, 2H, ArH). <sup>13</sup>C NMR (CDCl<sub>3</sub>, 100 MHz, TMS) δ 21.2, 35.8, 42.4, 74.0, 76.0, 109.8, 110.2, 127.4, 129.2, 135.5,

142.7, 143.4, 148.2. IR (CH<sub>2</sub>Cl<sub>2</sub>)  $\nu$  3290, 2923, 1597, 1495, 1348, 1330, 1186, 1159, 1092, 914, 813, 704, 657 cm<sup>-1</sup>. MS (ESI)  $m/z$  (%): 307.1 (100) [M<sup>+</sup>+NH<sub>4</sub>]; HRMS (ESI) Calcd. For C<sub>15</sub>H<sub>19</sub>N<sub>2</sub>O<sub>3</sub>S<sup>+</sup>(M<sup>+</sup>+NH<sub>4</sub>) requires 307.1111, Found: 307.1116.

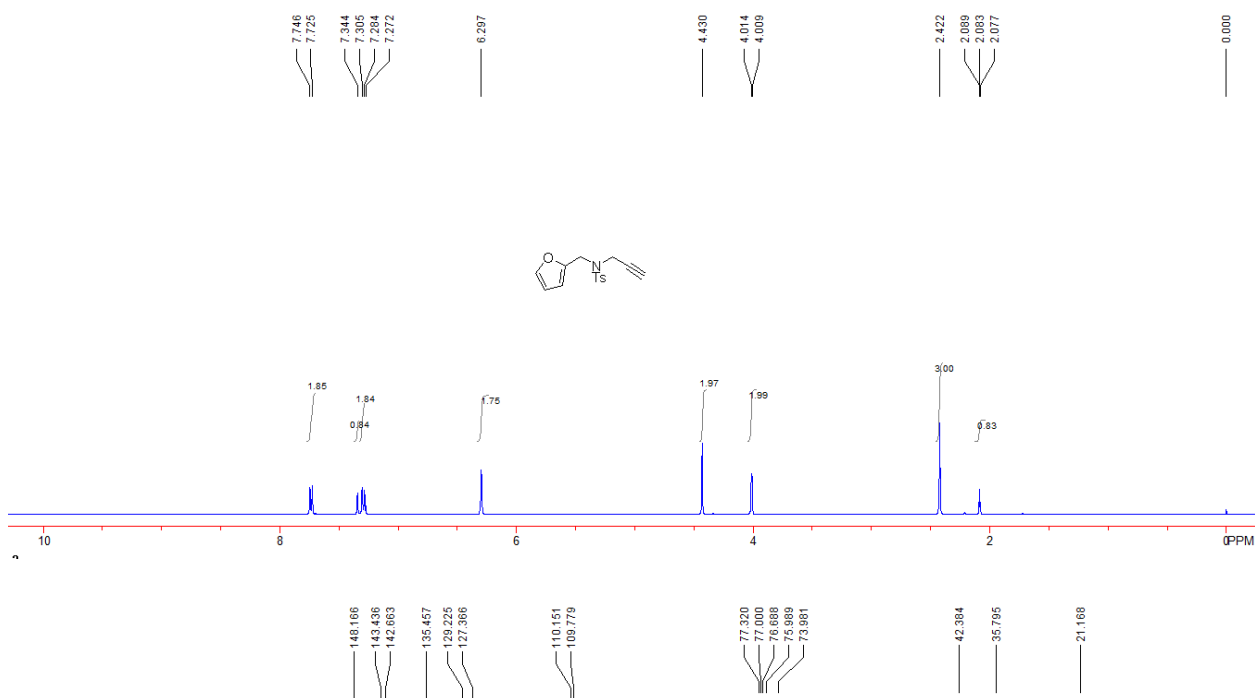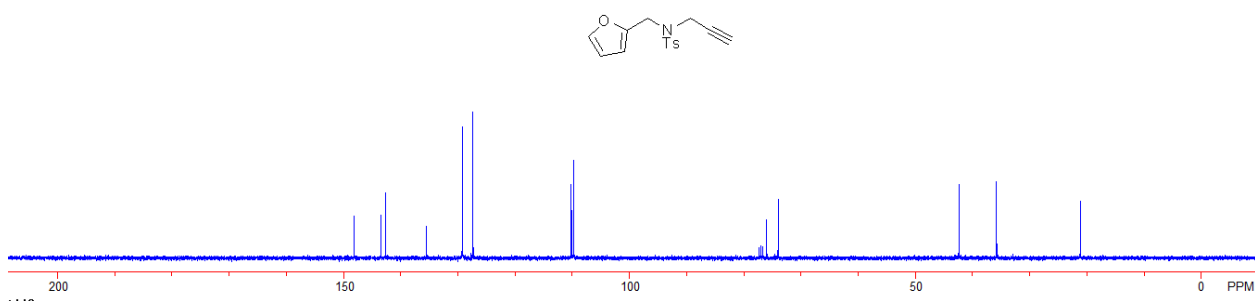

Compounds **1b** and **1c** were prepared in the similar method as that of **1a**.

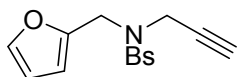

#### 4-bromo-*N*-(furan-2-ylmethyl)-*N*-(prop-2-yn-1-yl) benzenesulfonamide **1b**

A white solid, 67% yield (777 mg). M.p.: 89-91 °C. <sup>1</sup>H NMR (CDCl<sub>3</sub>, TMS, 400 MHz)  $\delta$  2.11 (t,  $J$  = 2.4 Hz, 1H, CH), 4.03 (d,  $J$  = 2.4 Hz, 2H, CH<sub>2</sub>), 4.44 (s, 2H, CH<sub>2</sub>), 6.31 (d,  $J$  = 1.2 Hz, 2H, ArH), 7.35 (t,  $J$  = 1.2 Hz, 1H, ArH), 7.64 (d,  $J$  = 8.8 Hz, 2H, ArH), 7.72 (d,  $J$  = 8.8 Hz, 2H, ArH). <sup>13</sup>C NMR (CDCl<sub>3</sub>, 100 MHz, TMS)  $\delta$  36.2, 42.7, 74.3, 76.1, 110.2, 110.4, 127.8, 129.2, 132.1,

138.0, 143.1, 148.1. IR (CH<sub>2</sub>Cl<sub>2</sub>)  $\nu$  3291, 1574, 1471, 1351, 1332, 1161, 1091, 1067, 1009, 914, 891, 766, 741, 722 cm<sup>-1</sup>. MS (ESI)  $m/z$  (%): 353.9 (100) [M<sup>+</sup>+H]; HRMS (ESI) Calcd. For C<sub>14</sub>H<sub>13</sub>BrNO<sub>3</sub>S<sup>+</sup>(M<sup>+</sup>+H) requires 353.9794, Found: 353.9776.

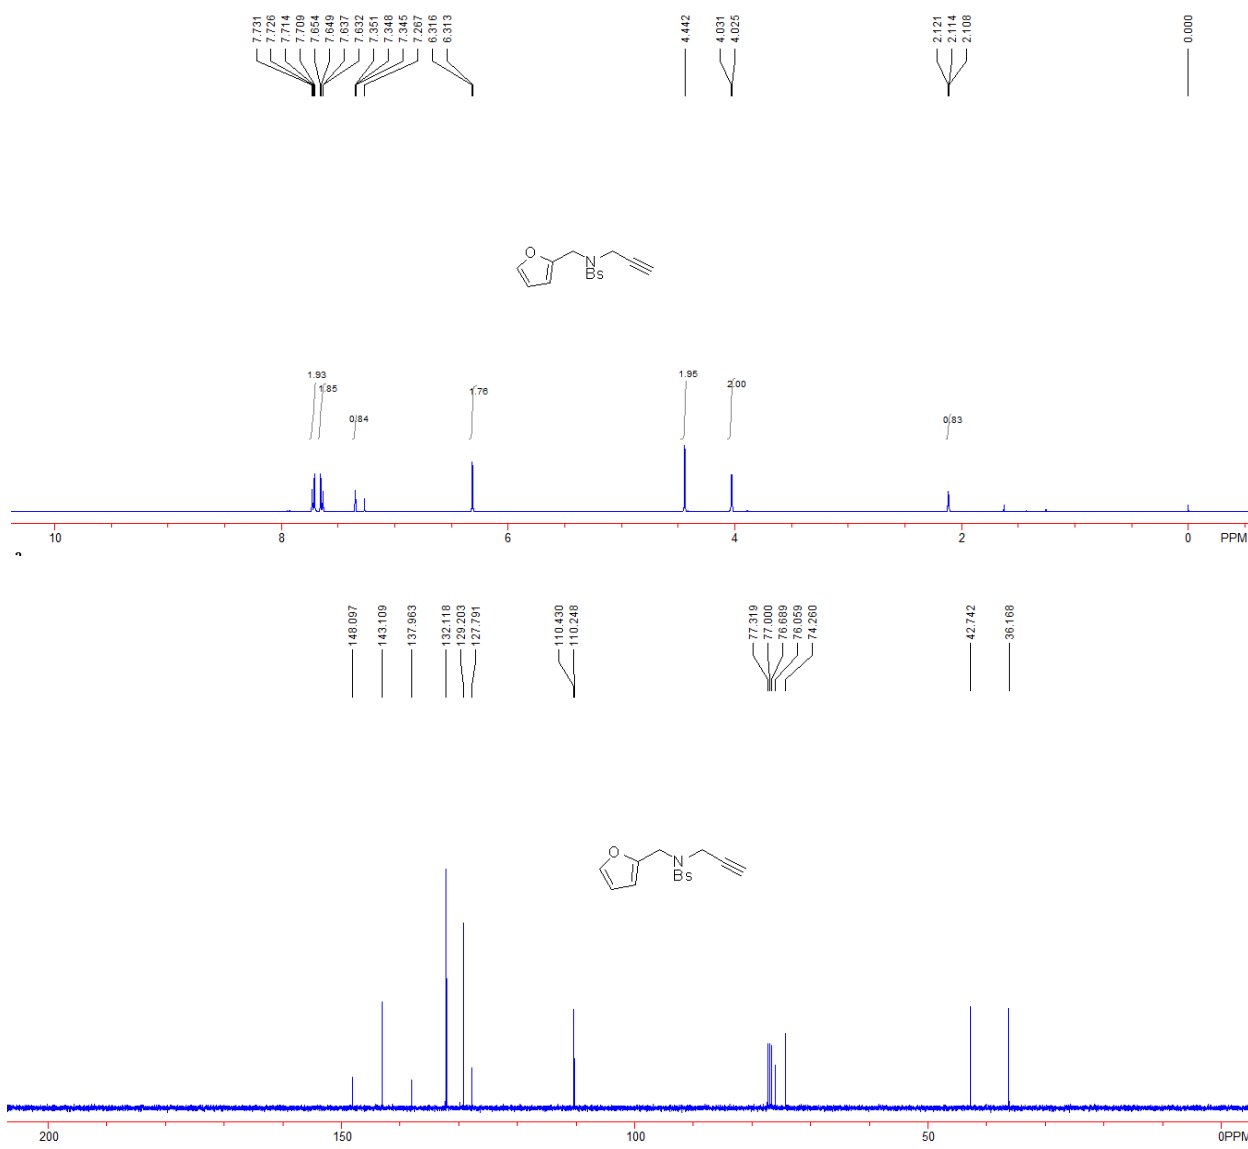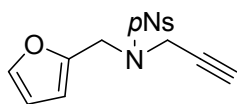

### ***N*-(furan-2-ylmethyl)-4-nitro-*N*-(prop-2-yn-1-yl)benzenesulfonamide 1c**

A pale yellow solid, 78% yield (432 mg). M.p.: 120-122 °C. <sup>1</sup>H NMR (CDCl<sub>3</sub>, TMS, 400 MHz)  $\delta$  2.12 (t,  $J$  = 2.4 Hz, 1H, CH), 4.08 (d,  $J$  = 2.4 Hz, 2H, CH<sub>2</sub>), 4.50 (s, 2H, CH<sub>2</sub>), 6.32 (dd,  $J$  = 2.8, 2.0 Hz, 1H, ArH), 6.34 (d,  $J$  = 2.8 Hz, 1H, ArH), 7.34 (dd,  $J$  = 2.0, 0.8 Hz, 1H, ArH), 8.04 (d,  $J$  = 8.8 Hz, 2H, ArH), 8.35 (d,  $J$  = 8.8 Hz, 2H, ArH). <sup>13</sup>C NMR (CDCl<sub>3</sub>, 100 MHz, TMS)  $\delta$  36.4, 42.9, 74.5, 75.8, 110.5, 110.6, 124.1, 128.9, 143.3, 144.8, 147.7, 150.1. IR (CH<sub>2</sub>Cl<sub>2</sub>)  $\nu$  3288,

3106, 1606, 1527, 1504, 1348, 1162, 1108, 1092, 854, 738, 719, B 683  $\text{cm}^{-1}$ . MS (ESI)  $m/z$  (%): 321.0 (100)  $[\text{M}^+\text{H}]$ ; HRMS (ESI) Calcd. For  $\text{C}_{14}\text{H}_{13}\text{N}_2\text{O}_5\text{S}^+(\text{M}^+\text{H})$  requires 321.0540, Found: 321.0538.

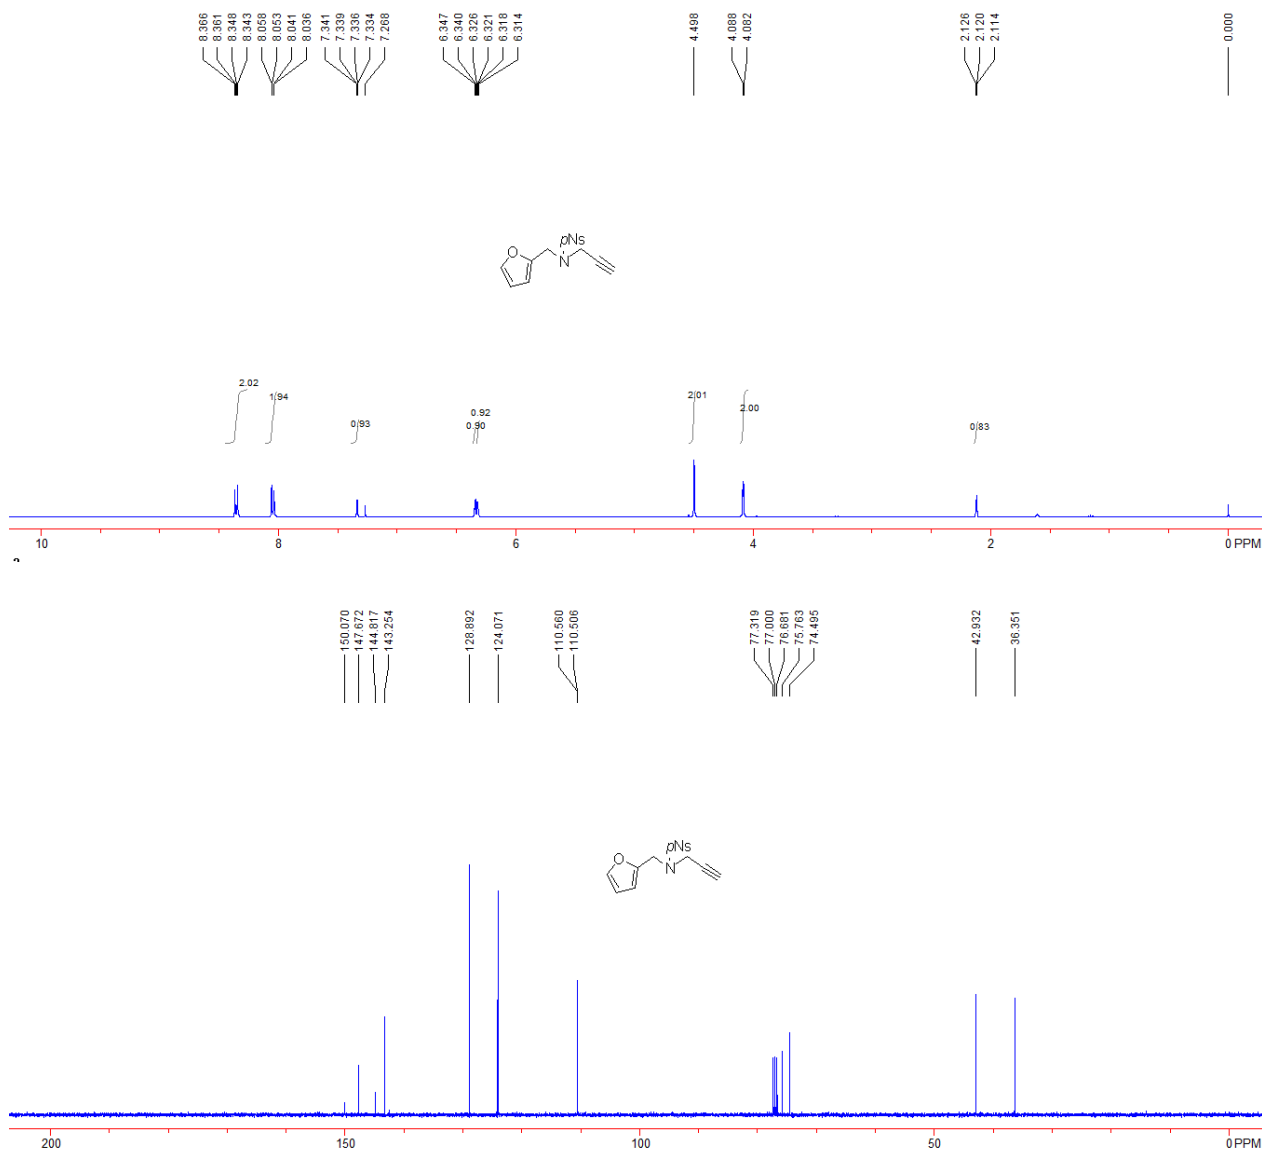

### Scheme 2. Synthesis of **1d**.

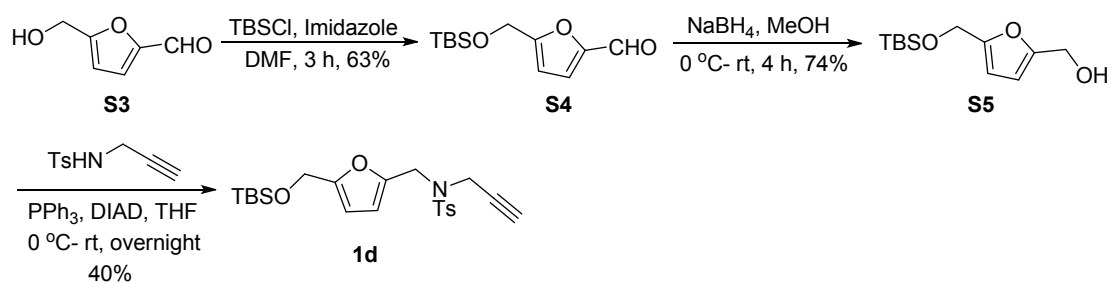

Compound **S4** was synthesized by a procedure reported by MacPhail.<sup>[2]</sup>

Compound **S5** was prepared according to the previous literature.<sup>[3]</sup>

Compound **1d** was prepared in the similar method as that of **1a**

***N*-((5-(((*tert*-butyldimethylsilyloxy)methyl)furan-2-yl)methyl)-4-methyl-*N*-(prop-2-yn-1-yl)benzenesulfonamide **1d****

A yellow liquid, 40% yield (121 mg).  $^1\text{H}$  NMR ( $\text{CDCl}_3$ , TMS, 400 MHz)  $\delta$  0.08 (s, 6H,  $\text{CH}_3$ ), 0.90 (s, 9H,  $\text{CH}_3$ ), 2.06 (t,  $J = 2.4$  Hz, 1H, CH), 2.43 (s, 3H,  $\text{CH}_3$ ), 4.03 (d,  $J = 2.4$  Hz, 2H,  $\text{CH}_2$ ), 4.41 (s, 2H,  $\text{CH}_2$ ), 4.55 (s, 2H,  $\text{CH}_2$ ), 6.15 (d,  $J = 3.2$  Hz, 1H, ArH), 6.23 (d,  $J = 3.2$  Hz, 1H, ArH), 7.29 (d,  $J = 8.0$  Hz, 2H, ArH), 7.73 (d,  $J = 8.0$  Hz, 2H, ArH).  $^{13}\text{C}$  NMR ( $\text{CDCl}_3$ , 100 MHz, TMS)  $\delta$  -5.3, 18.3, 21.5, 25.8, 36.0, 42.7, 58.0, 73.9, 76.3, 107.8, 110.6, 127.7, 129.4, 135.8, 143.5, 147.8, 154.8. IR ( $\text{CH}_2\text{Cl}_2$ )  $\nu$  3279, 2926, 1724, 1597, 1494, 1347, 1158, 1016, 972, 838, 751, 660  $\text{cm}^{-1}$ . MS (ESI)  $m/z$  (%): 451.2 (100) [ $\text{M}^++\text{NH}_4$ ]; HRMS (ESI) Calcd. For  $\text{C}_{22}\text{H}_{35}\text{N}_2\text{O}_4\text{SSi}^+1(\text{M}^++\text{NH}_4)$  requires 451.2081, Found: 451.2092.

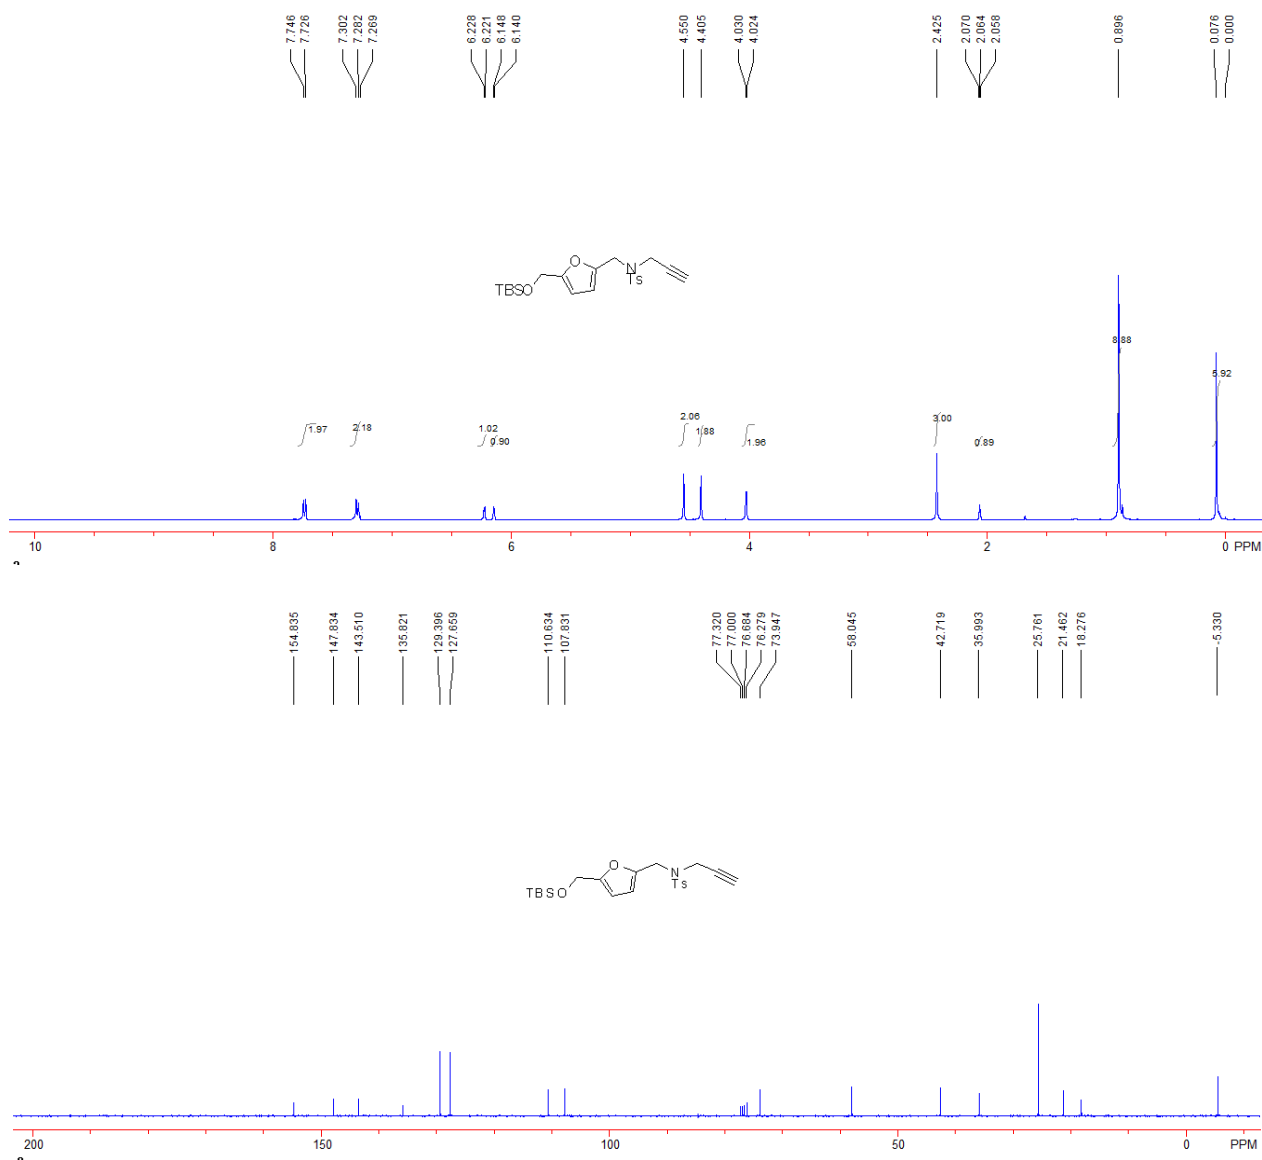

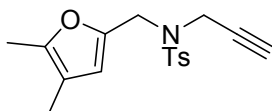

***N*-((4,5-dimethylfuran-2-yl)methyl)-4-methyl-*N*-(prop-2-yn-1-yl)benzenesulfonamide **1e****

A yellow liquid, 54% yield (171 mg).  $^1\text{H}$  NMR ( $\text{CDCl}_3$ , TMS, 400 MHz)  $\delta$  1.87 (s, 3H,  $\text{CH}_3$ ), 2.06 (t,  $J = 2.4$  Hz, 1H, CH), 2.11 (s, 3H,  $\text{CH}_3$ ), 2.43 (s, 3H,  $\text{CH}_3$ ), 4.02 (d,  $J = 2.4$  Hz, 2H,  $\text{CH}_2$ ), 4.33 (s, 2H,  $\text{CH}_2$ ), 6.05 (s, 1H, ArH), 7.28 (d,  $J = 8.0$  Hz, 2H, ArH), 7.73 (d,  $J = 8.0$  Hz, 2H, ArH).  $^{13}\text{C}$  NMR ( $\text{CDCl}_3$ , 100 MHz, TMS)  $\delta$  9.7, 11.2, 21.4, 35.9, 42.7, 73.8, 76.5, 113.4, 114.5, 127.7, 129.3, 135.9, 143.4, 144.9, 147.9. IR ( $\text{CH}_2\text{Cl}_2$ )  $\nu$  3285, 2923, 1598, 1348, 1160, 1119, 706, 654  $\text{cm}^{-1}$ . MS (ESI)  $m/z$  (%): 318.1 (100) [ $\text{M}^+\text{+H}$ ]; HRMS (ESI) Calcd. For  $\text{C}_{17}\text{H}_{20}\text{NO}_3\text{S}^+\text{(M}^+\text{+H)}$  requires 318.1158, Found: 318.1161.

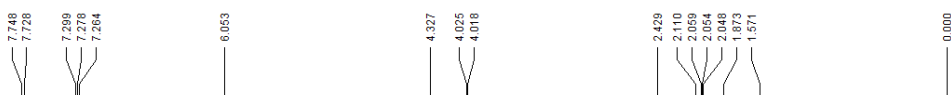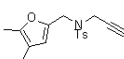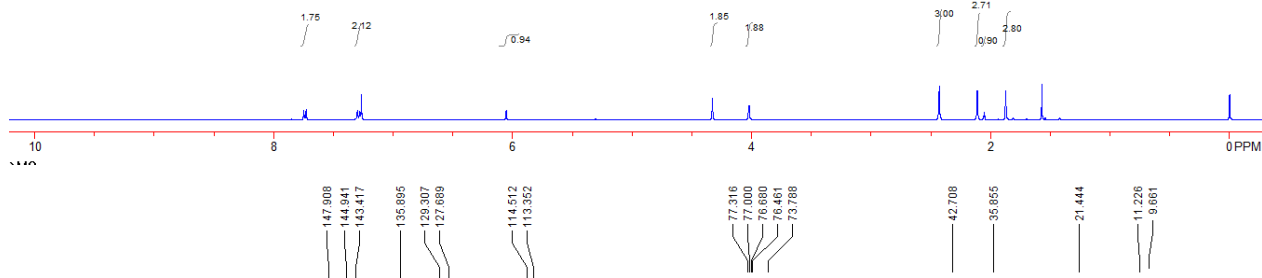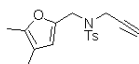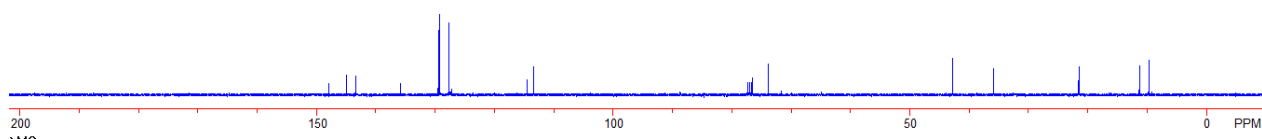

**Scheme 3. Synthesis of **1f**.**

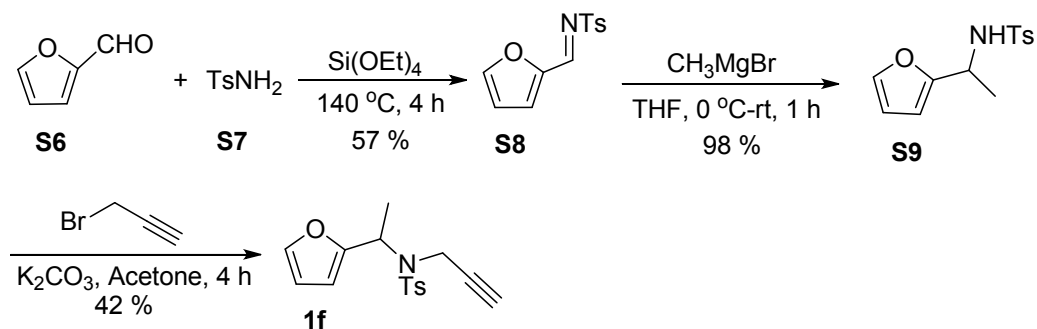

Compound **S9** was prepared according to previous literature.<sup>[4]</sup>

Compound **1f** was prepared according to previous literature.<sup>[5]</sup>

### ***N*-(1-(furan-2-yl)ethyl)-4-methyl-*N*-(prop-2-yn-1-yl)benzenesulfonamide 1f**

A White solid, 41% yield (355 mg). M.p.: 78-80 °C. <sup>1</sup>H NMR (CDCl<sub>3</sub>, TMS, 400 MHz) δ 1.55 (d, *J* = 7.2 Hz, 3H, CH<sub>3</sub>), 2.05 (t, *J* = 2.0 Hz, 1H, CH), 2.43 (s, 3H, CH<sub>3</sub>), 3.74 (dd, *J* = 2.0, 18.4 Hz, 1H, CH<sub>2</sub>), 4.09 (dd, *J* = 2.0, 18.4 Hz, 1H, CH<sub>2</sub>), 5.21 (q, *J* = 7.2 Hz, 1H, CH), 6.19 (d, *J* = 2.4 Hz, 1H, ArH), 6.27 (s, 1H, ArH), 7.27 (s, 1H, ArH), 7.29 (d, *J* = 8.0 Hz, 2H, ArH), 7.82 (d, *J* = 8.0 Hz, 2H, ArH). <sup>13</sup>C NMR (CDCl<sub>3</sub>, 100 MHz, TMS) δ 17.2, 21.5, 32.5, 50.7, 71.8, 79.5, 108.5, 110.1, 127.6, 129.3, 137.5, 142.3, 143.3, 152.6. IR (CH<sub>2</sub>Cl<sub>2</sub>) ν 3289, 2922, 2853, 1598, 1456, 1334, 1154, 1091, 1057, 1035, 876, 742, 657 cm<sup>-1</sup>. MS (ESI) *m/z* (%): 321.1 (100) [M<sup>+</sup>+NH<sub>4</sub>]; HRMS (ESI) Calcd. For C<sub>16</sub>H<sub>21</sub>N<sub>2</sub>O<sub>3</sub>S<sup>+</sup>(M<sup>+</sup>+NH<sub>4</sub>) requires 321.1273, Found: 321.1253.

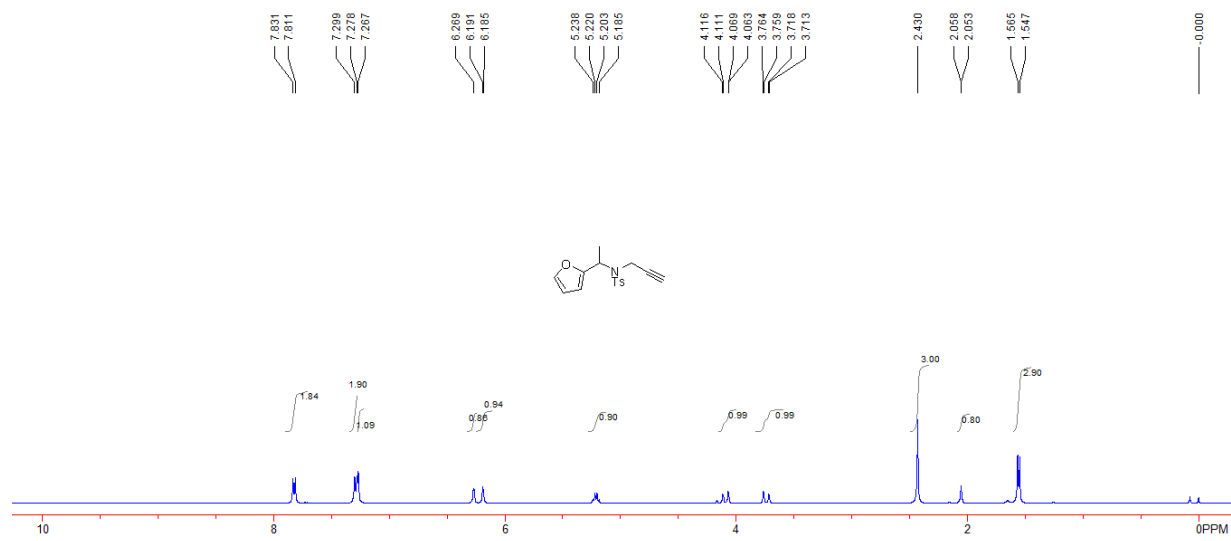



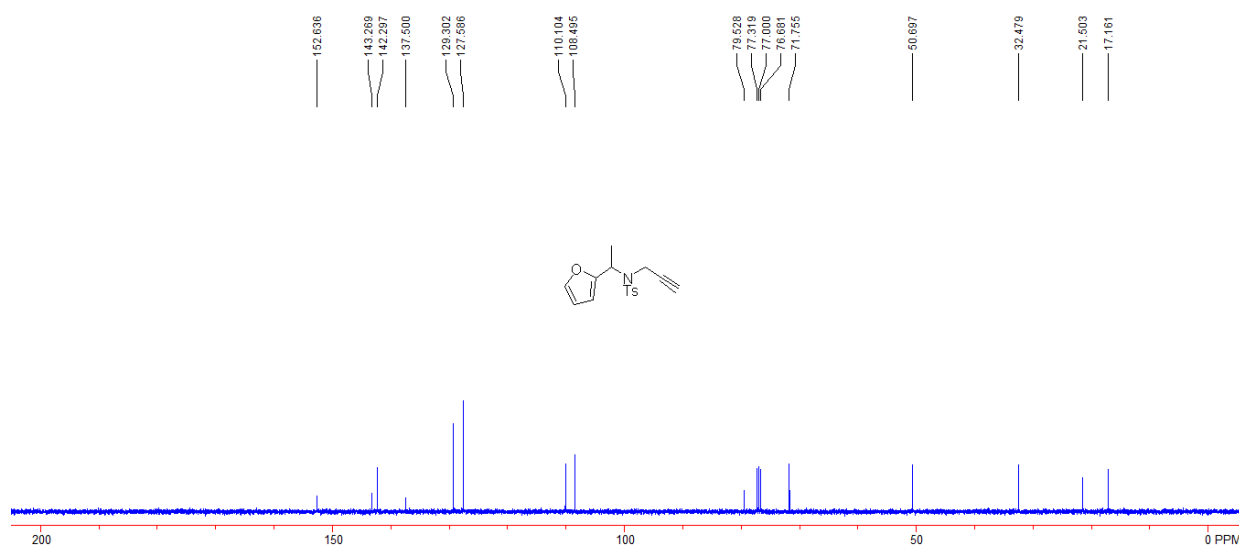

**Scheme 4.** Synthesis of **1g**.

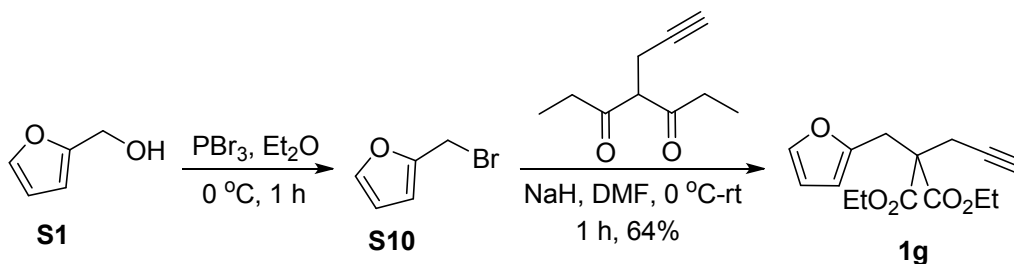

To a solution of **S1** (980 mg, 10 mmol) in Et<sub>2</sub>O (50 mL) at 0 °C was added dropwise PBr<sub>3</sub> (2.168 g, 8 mmol), the reaction mixture was warmed to room temperature and stirred for 1 hour. The reaction was quenched with water, and the organic layers were separated and the aqueous phase was washed with Et<sub>2</sub>O (3 x 20 mL). The combined organic layers were then dried over Na<sub>2</sub>SO<sub>4</sub> and concentrated via a rotary evaporator to afford a yellow oil. The crude product was directly used in next step. To a stirred suspension of NaH (120 mg, 3 mmol; 60% in mineral oil) in dry DMF (15 mL) was added dropwise diethyl propargylmalonate (448 mg, 2.70 mmol) at 0 °C. After being stirred for 10 min, 2-(bromomethyl)furan **S10** was added and the mixture was stirred for 5 h at room temperature. Water (20 mL) was added to the flask and the product was extracted with Et<sub>2</sub>O (3 x 20 mL) and dried over Na<sub>2</sub>SO<sub>4</sub>. The solvent was evaporated and the crude product was purified by a column chromatography (PE/EA = 10/1) to yield **1g** (479 mg, 64%) as a yellow oil.

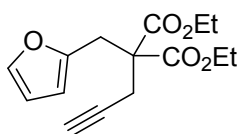

## Diethyl 2-(furan-2-ylmethyl)-2-(prop-2-yn-1-yl)malonate **1g**

A yellow oil, 64% yield (479 mg).  $^1\text{H}$  NMR ( $\text{CDCl}_3$ , TMS, 400 MHz)  $\delta$  1.27 (t,  $J = 6.8$  Hz, 6H,  $\text{CH}_3$ ), 2.07 (t,  $J = 2.4$  Hz, 1H, CH), 2.76 (d,  $J = 2.4$  Hz, 2H,  $\text{CH}_2$ ), 3.45 (s, 2H,  $\text{CH}_2$ ), 4.23 (q,  $J = 7.2$  Hz, 4H,  $\text{CH}_2$ ), 6.14 (d,  $J = 3.2$  Hz, 1H, ArH), 6.27 (dd,  $J = 1.6, 3.2$  Hz, 1H, ArH), 7.29 (dd,  $J = 0.8, 1.6$  Hz, 1H, ArH).  $^{13}\text{C}$  NMR ( $\text{CDCl}_3$ , 100 MHz, TMS)  $\delta$  14.0, 22.6, 30.6, 56.7, 61.9, 71.6, 79.0, 108.7, 110.3, 142.1, 150.1, 169.4. IR ( $\text{CH}_2\text{Cl}_2$ )  $\nu$  3290, 3107, 2982, 1734, 1531, 1350, 1165, 1012, 856, 740, 721, 683  $\text{cm}^{-1}$ . MS (ESI)  $m/z$  (%): 279.1 (100) [ $\text{M}^++\text{H}$ ]; HRMS (ESI) Calcd. For  $\text{C}_{15}\text{H}_{19}\text{O}_5^+ (\text{M}^++\text{H})$  requires 279.1227, Found: 279.1232.

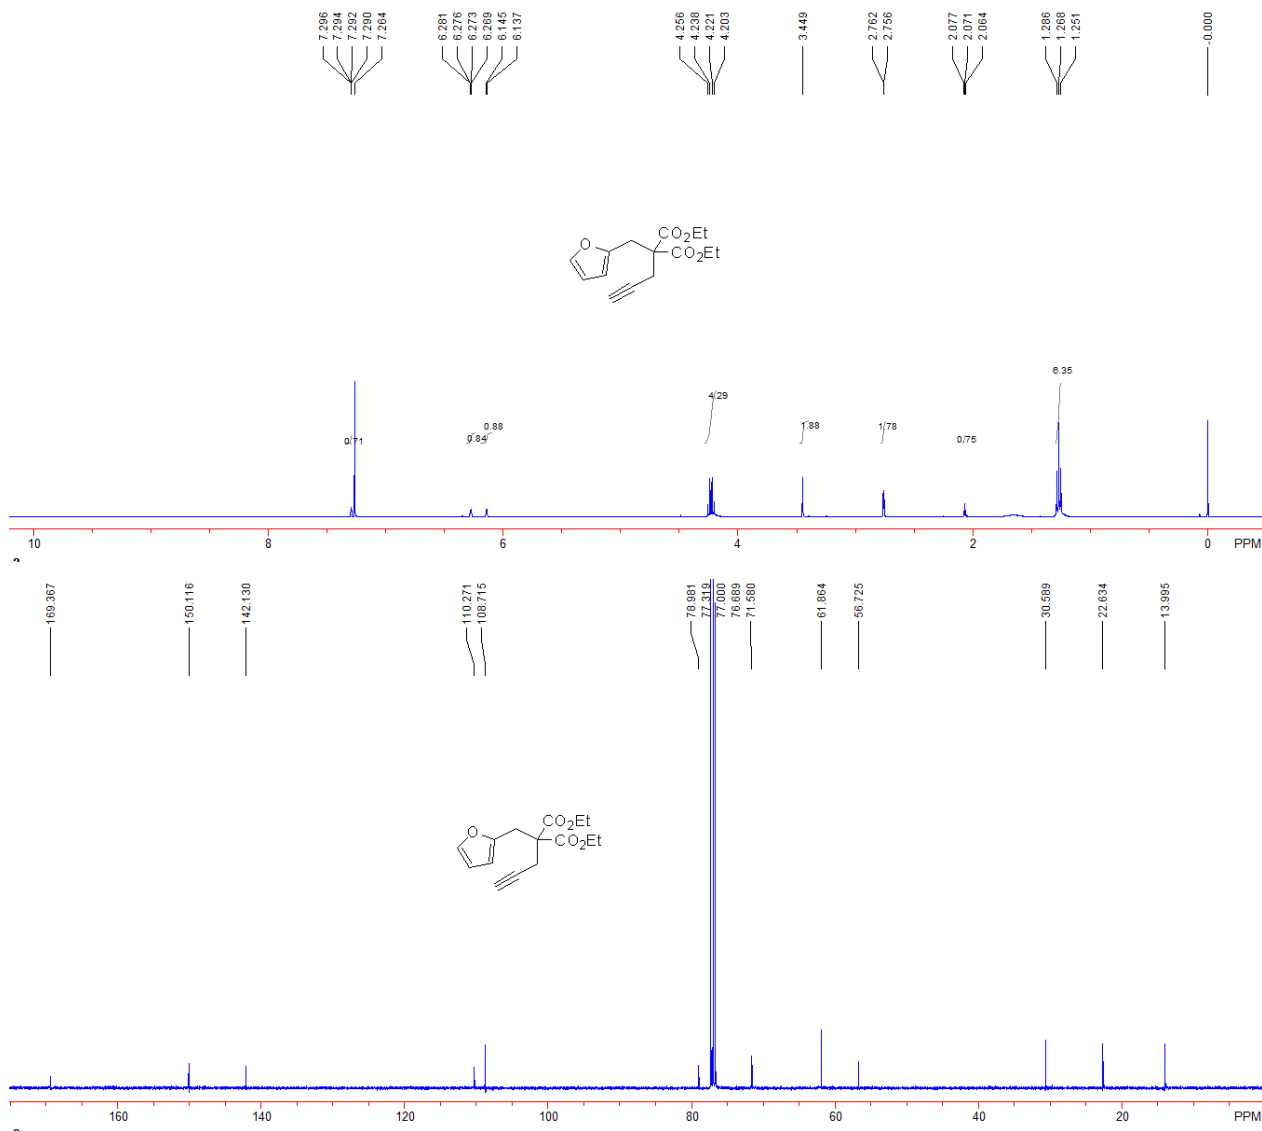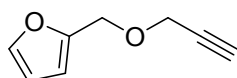

## 2-((prop-2-yn-1-yloxy)methyl)furan **1h**

Colorless liquid, 73% yield (248 mg).

The preparation of substrate **1h** has been detailed in Reference.<sup>[6]</sup>

### 3. General procedure for synthesis of substrates 4.

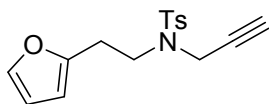

#### *N*-(2-(furan-2-yl)ethyl)-4-methyl-*N*-(prop-2-yn-1-yl)benzenesulfonamide **4a**

A pale yellow solid, 44% yield (2.109 g).

For preparation and characterization of **4a**, see reference.<sup>[1]</sup>

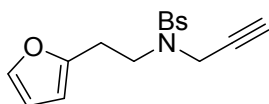

#### 4-bromo-*N*-(2-(furan-2-yl)ethyl)-*N*-(prop-2-yn-1-yl)benzenesulfonamide **4b**

A yellow solid, 71% yield (550 mg). M.p.: 69-70 °C. <sup>1</sup>H NMR (CDCl<sub>3</sub>, TMS, 400 MHz) δ 2.08 (t, *J* = 2.4 Hz, 1H, CH), 2.95 (t, *J* = 7.6 Hz, 2H, CH<sub>2</sub>), 3.48 (t, *J* = 7.6 Hz, 2H, CH<sub>2</sub>), 4.08 (d, *J* = 2.4 Hz, 2H, CH<sub>2</sub>), 6.11 (d, *J* = 3.2 Hz, 1H, ArH), 6.29 (s, 1H, ArH), 7.31 (d, *J* = 0.8 Hz, 1H, ArH), 7.63 (d, *J* = 8.0 Hz, 2H, ArH), 7.70 (d, *J* = 8.0 Hz, 2H, ArH). <sup>13</sup>C NMR (CDCl<sub>3</sub>, 100 MHz, TMS) δ 27.3, 36.8, 45.1, 74.1, 76.2, 106.7, 110.4, 127.7, 129.1, 132.1, 137.8, 141.6, 151.7. IR (CH<sub>2</sub>Cl<sub>2</sub>) ν 3292, 2926, 1574, 1471, 1349, 1160, 1068, 1009, 907, 738, 712 cm<sup>-1</sup>. MS (ESI) *m/z* (%): 367.9 (100) [M<sup>+</sup>+H]; HRMS (ESI) Calcd. For C<sub>15</sub>H<sub>15</sub>BrNO<sub>3</sub>S<sup>+</sup>(M<sup>+</sup>+H) requires 367.9951, Found: 367.9954.

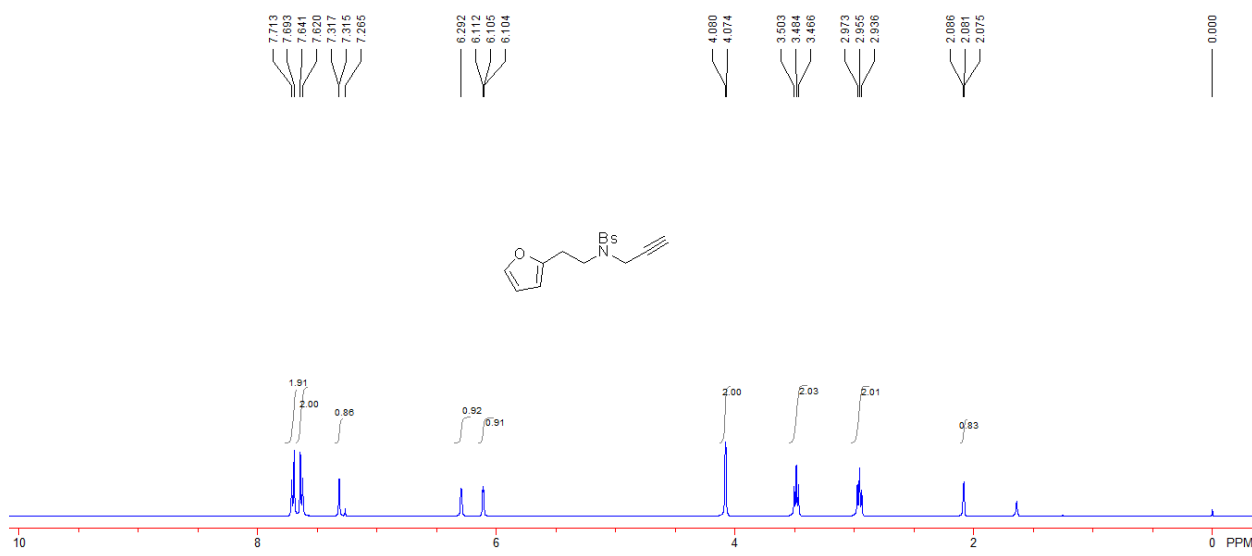

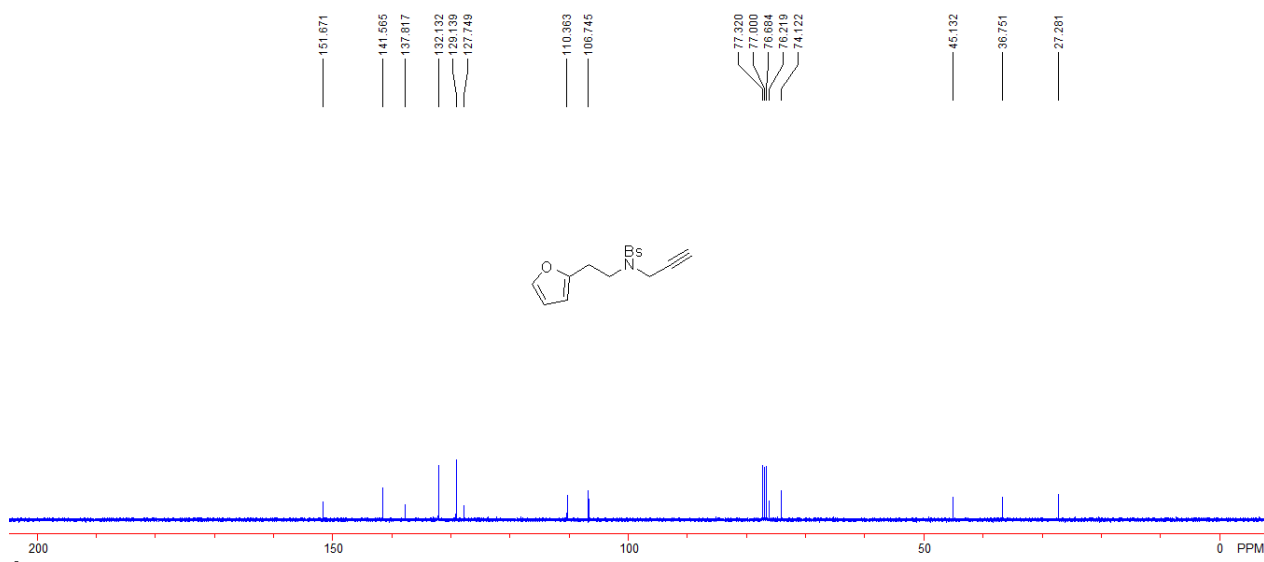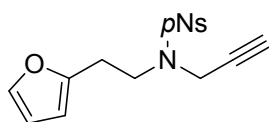

#### ***N*-(2-(furan-2-yl)ethyl)-4-nitro-*N*-(prop-2-yn-1-yl)benzenesulfonamide 4c**

A pale yellow solid, 80% yield (454 mg).

For preparation and characterization of **4c**, see reference.<sup>[1]</sup>

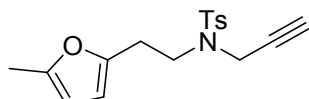

#### **4-methyl-*N*-(2-(5-methylfuran-2-yl)ethyl)-*N*-(prop-2-yn-1-yl)benzenesulfonamide 4d**

A colorless liquid, 92% yield (640 mg). <sup>1</sup>H NMR (CDCl<sub>3</sub>, TMS, 400 MHz) δ 2.05 (t, *J* = 2.4 Hz, 1H, CH), 2.24 (s, 3H, CH<sub>3</sub>), 2.42 (s, 3H, CH<sub>3</sub>), 2.89 (t, *J* = 7.6 Hz, 2H, CH<sub>2</sub>), 3.46 (t, *J* = 7.6 Hz, 2H, CH<sub>2</sub>), 4.08 (d, *J* = 2.4 Hz, 2H, CH<sub>2</sub>), 5.84 (dd, *J* = 0.8, 2.8 Hz, 1H, ArH), 5.95 (d, *J* = 2.8 Hz, 1H, ArH), 7.28 (d, *J* = 8.0 Hz, 2H, ArH), 7.74 (d, *J* = 8.0 Hz, 2H, ArH). <sup>13</sup>C NMR (CDCl<sub>3</sub>, 100 MHz, TMS) δ 13.2, 21.2, 27.1, 36.5, 45.0, 73.7, 76.4, 105.9, 107.0, 127.3, 129.3, 135.6, 143.4, 149.8, 150.7. IR (CH<sub>2</sub>Cl<sub>2</sub>) ν 3283, 2922, 1597, 1569, 1346, 1185, 1157, 1092, 906, 784, 723, 658 cm<sup>-1</sup>. MS (ESI) *m/z* (%): 318.1 (100) [M<sup>+</sup>+H]; HRMS (ESI) Calcd. For C<sub>17</sub>H<sub>20</sub>NO<sub>3</sub>S<sup>+</sup>(M<sup>+</sup>+H) requires 318.1158, Found: 318.1162.

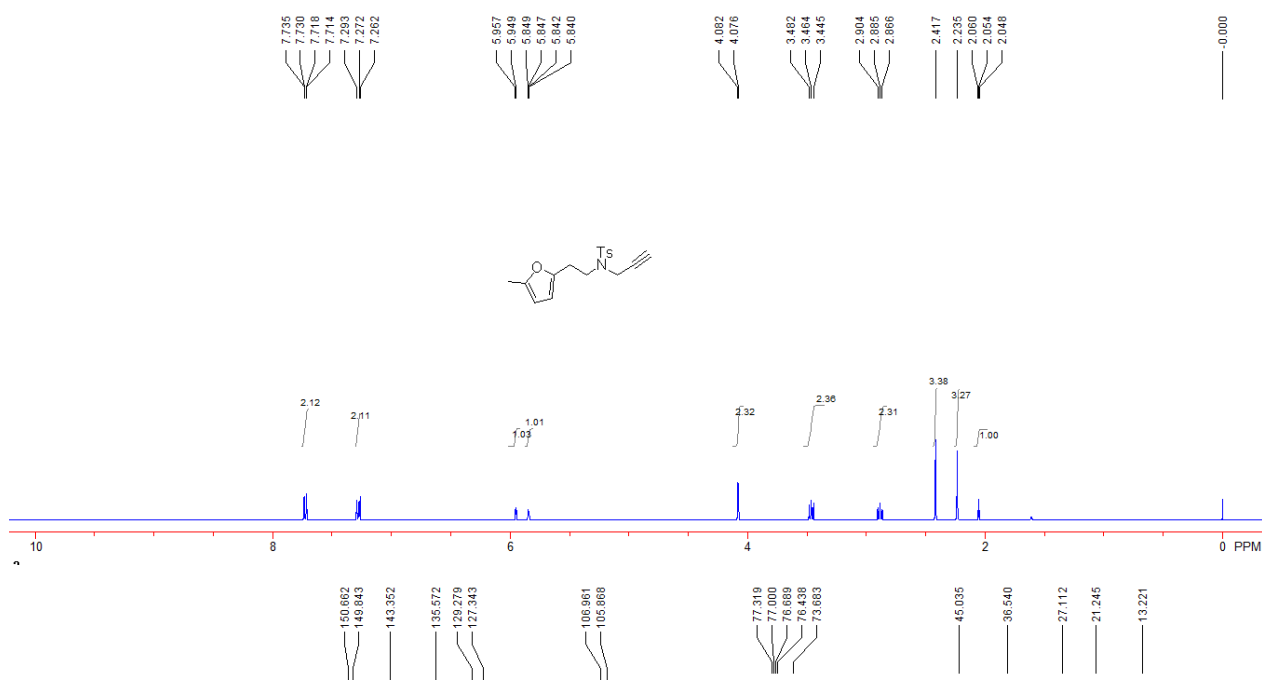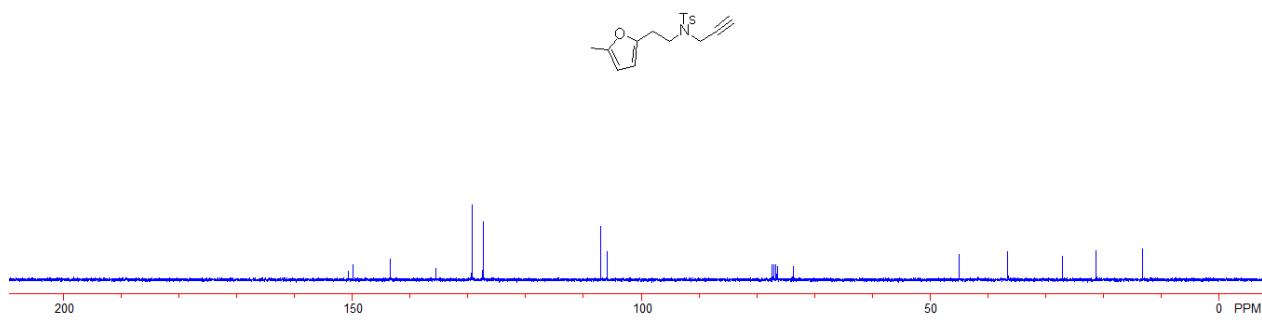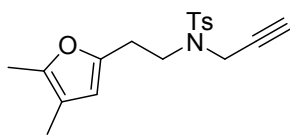

***N*-(2-(4,5-dimethylfuran-2-yl)ethyl)-4-methyl-*N*-(prop-2-yn-1-yl)benzenesulfonamide 4e**

A colorless liquid, 41% yield (268mg). <sup>1</sup>H NMR (CDCl<sub>3</sub>, TMS, 400 MHz) δ 1.88 (s, 3H, CH<sub>3</sub>), 2.05 (t, *J* = 2.4 Hz, 1H, CH), 2.14 (s, 3H, CH<sub>3</sub>), 2.41 (s, 3H, CH<sub>3</sub>), 2.84 (t, *J* = 7.6 Hz, 2H, CH<sub>2</sub>), 3.45 (t, *J* = 7.6 Hz, 2H, CH<sub>2</sub>), 4.08 (d, *J* = 2.4, 2H, CH<sub>2</sub>), 5.85 (s, 1H, ArH), 7.27 (d, *J* = 8.4 Hz, 2H, ArH), 7.71 (d, *J* = 8.4 Hz, 2H, ArH). <sup>13</sup>C NMR (CDCl<sub>3</sub>, 100 MHz, TMS) δ 9.8, 11.2, 21.5, 27.3, 36.7, 45.2, 73.7, 76.7, 109.7, 114.4, 127.6, 129.4, 135.9, 143.5, 146.1, 148.8. IR (CH<sub>2</sub>Cl<sub>2</sub>) ν 3284, 2923, 2855, 1727, 1346, 1306, 1158, 1092, 1018, 747, 657 cm<sup>-1</sup>. MS (ESI) *m/z* (%): 332.1 (100) [M<sup>+</sup>+H]; HRMS (ESI) Calcd. For C<sub>18</sub>H<sub>22</sub>NO<sub>3</sub>S<sup>+1</sup>(M<sup>+</sup>+H) requires 332.1315, Found: 332.1317.

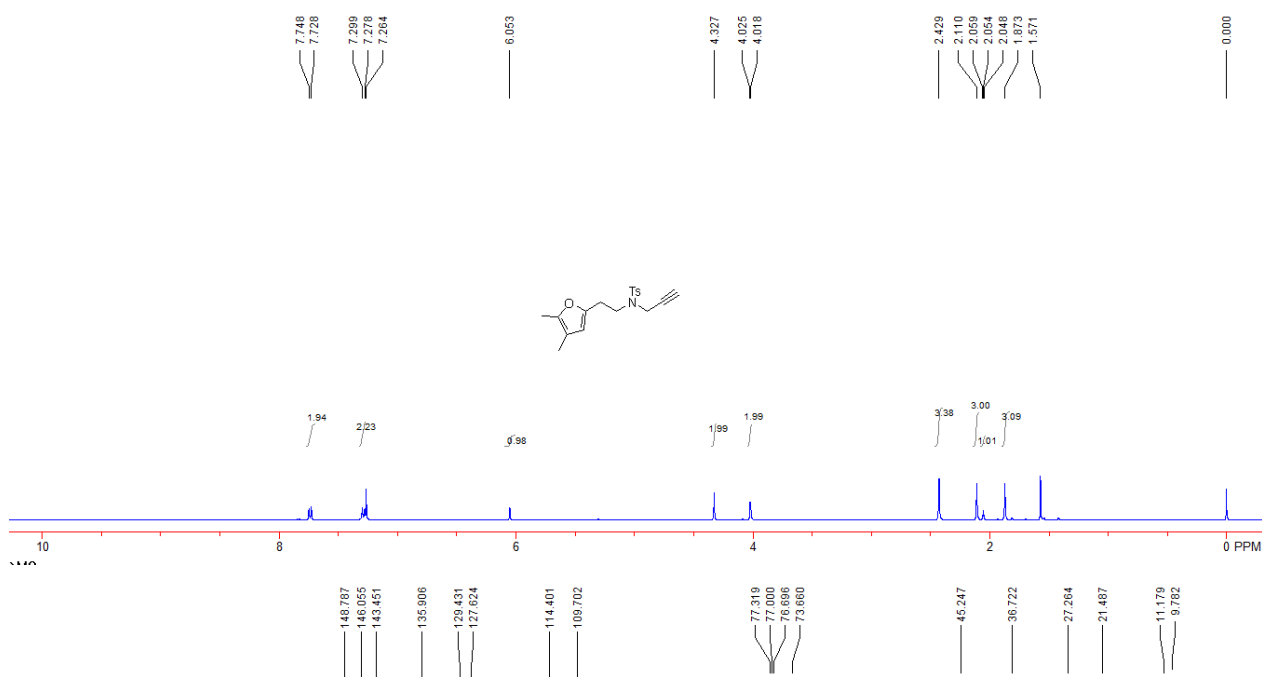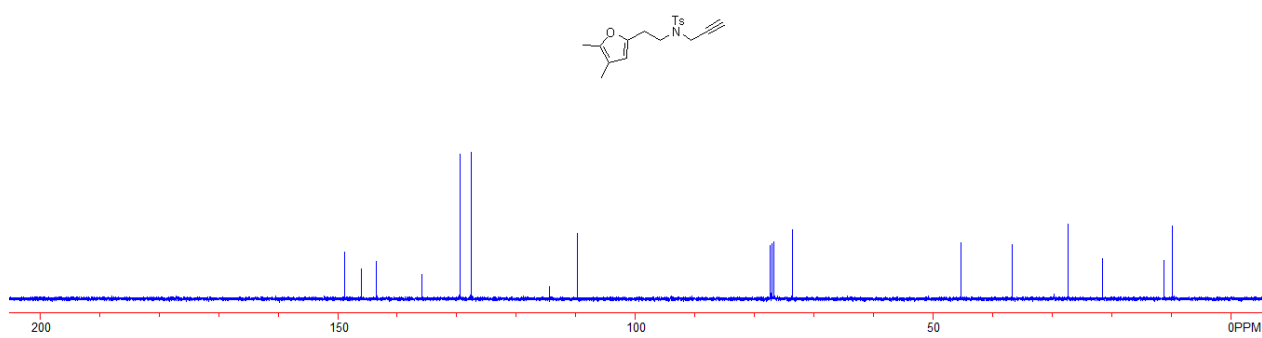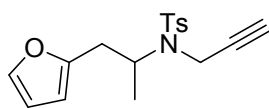

### ***N*-(1-(furan-2-yl)propan-2-yl)-4-methyl-*N*-(prop-2-yn-1-yl)benzenesulfonamide 4f**

A yellow liquid, 16% yield (305 mg).  $^1\text{H}$  NMR ( $\text{CDCl}_3$ , TMS, 400 MHz)  $\delta$  1.16 (d,  $J = 6.8$  Hz, 3H,  $\text{CH}_3$ ), 2.19 (t,  $J = 2.4$  Hz, 1H, CH), 2.40 (s, 3H,  $\text{CH}_3$ ), 2.82 (dd,  $J = 8.4, 14.8$  Hz, 1H,  $\text{CH}_2$ ), 2.90 (dd,  $J = 6.0, 14.8$  Hz, 1H,  $\text{CH}_2$ ), 4.07 (d,  $J = 2.4$  Hz, 2H,  $\text{CH}_2$ ), 4.27 (sep,  $J = 6.8$  Hz, 1H, CH), 6.03 (d,  $J = 2.8$  Hz, 1H, ArH), 6.25 (t,  $J = 2.4$  Hz, 1H, ArH), 7.25 (s, 1H, ArH), 7.26 (d,  $J = 8.0$  Hz, 2H, ArH), 7.74 (d,  $J = 8.0$  Hz, 2H, ArH).  $^{13}\text{C}$  NMR ( $\text{CDCl}_3$ , 100 MHz, TMS)  $\delta$  18.1, 21.4, 32.1, 33.8, 53.3, 72.5, 79.9, 107.0, 110.2, 127.3, 129.4, 137.5, 141.3, 143.1, 151.9. IR ( $\text{CH}_2\text{Cl}_2$ )  $\nu$  3284, 2962, 1717, 1598, 1332, 1306, 1155, 1092, 813, 799, 658  $\text{cm}^{-1}$ . MS (ESI)  $m/z$

(%): 318.1 (100) [M<sup>++</sup>H]; HRMS (ESI) Calcd. For C<sub>17</sub>H<sub>20</sub>NO<sub>3</sub>S<sup>+</sup>(M<sup>++</sup>H) requires 318.1158, Found: 318.1163.

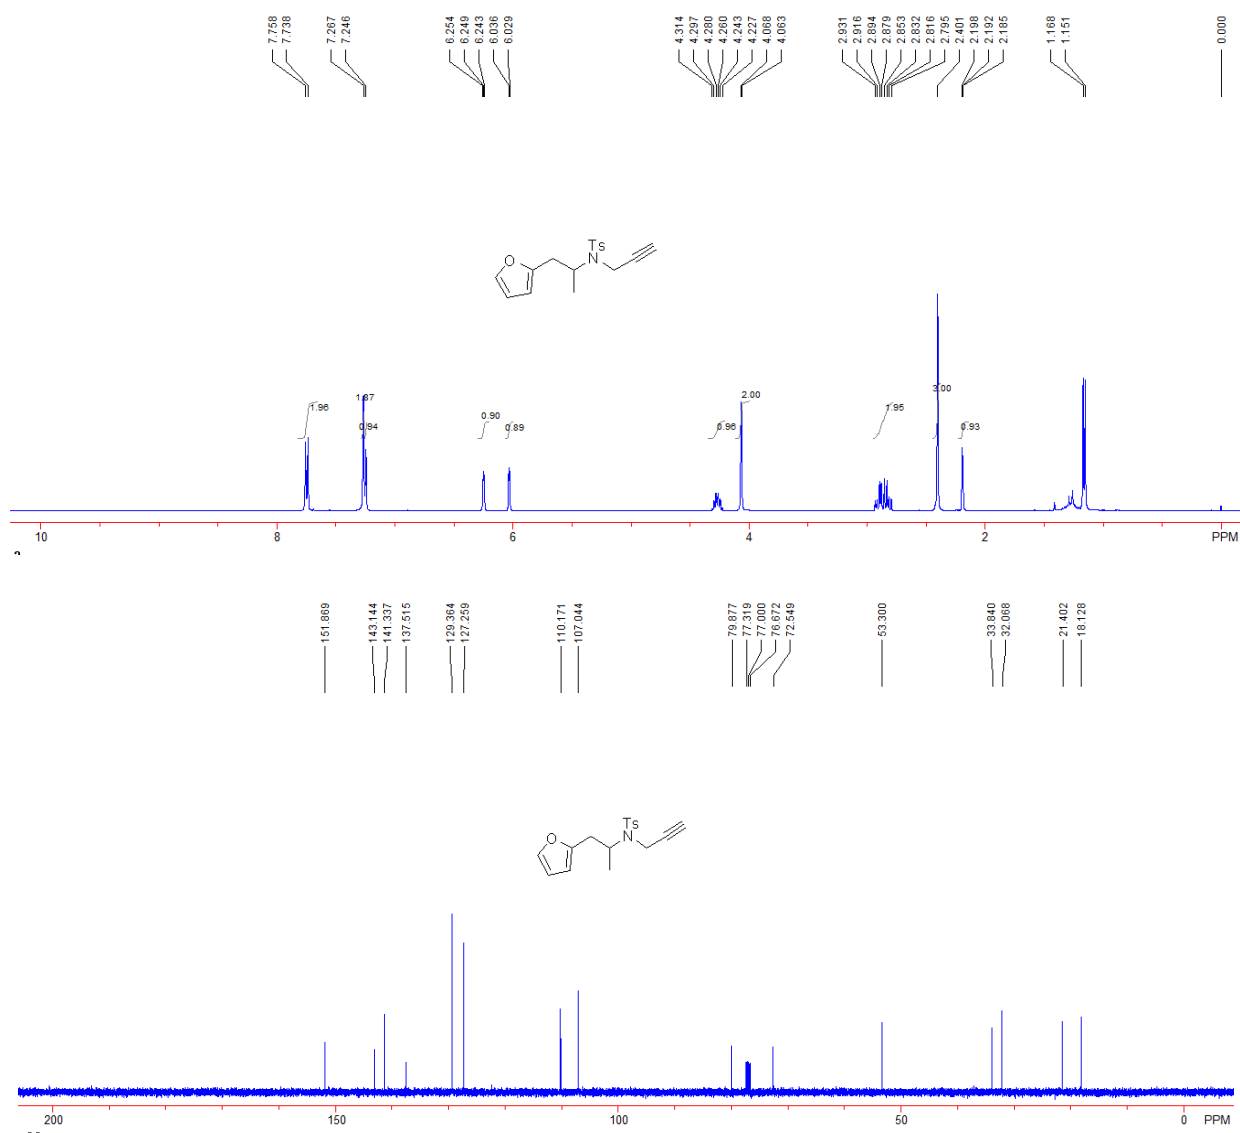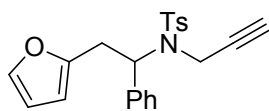

***N*-(2-(furan-2-yl)-1-phenylethyl)-4-methyl-*N*-(prop-2-yn-1-yl) benzenesulfonamide 4g**

A yellow solid, 50% yield (529 mg). M.p.: 90-92 °C. <sup>1</sup>H NMR (CDCl<sub>3</sub>, TMS, 400 MHz) δ 2.14 (t, *J* = 2.4 Hz, 1H, CH), 2.37 (s, 3H, CH<sub>3</sub>), 2.23 (dd, *J* = 5.6, 15.2 Hz, 1H, CH<sub>2</sub>), 3.51-3.58 (m, 2H, CH<sub>2</sub>), 4.21 (dd, *J* = 2.4, 18.8 Hz, 1H, CH<sub>2</sub>), 5.51 (dd, *J* = 6.0, 9.6 Hz, 1H, CH), 5.92 (d, *J* = 3.2 Hz, 1H, ArH), 6.15 (dd, *J* = 2.0, 2.8 Hz, 1H, ArH), 7.20-7.28 (m, 6H, ArH), 7.34 (d, *J* = 8.0 Hz, 2H, ArH), 7.70 (d, *J* = 8.0 Hz, 2H, ArH). <sup>13</sup>C NMR (CDCl<sub>3</sub>, 100 MHz, TMS) δ 21.3, 30.1, 33.0, 59.5, 72.8, 79.5, 107.2, 110.1, 127.3, 128.0, 128.3, 129.3, 136.7, 137.6, 141.1, 143.2, 151.5.

IR (CH<sub>2</sub>Cl<sub>2</sub>)  $\nu$  3290, 2922, 1597, 1496, 1333, 1154, 1092, 812, 772, 716, 657 cm<sup>-1</sup>. MS (ESI) *m/z* (%): 397.1 (100) [M<sup>+</sup>+NH<sub>4</sub>]; HRMS (ESI) Calcd. For C<sub>22</sub>H<sub>25</sub>N<sub>2</sub>O<sub>3</sub>S<sup>+</sup>(M<sup>+</sup>+NH<sub>4</sub>) requires 397.1580, Found: 397.1585.

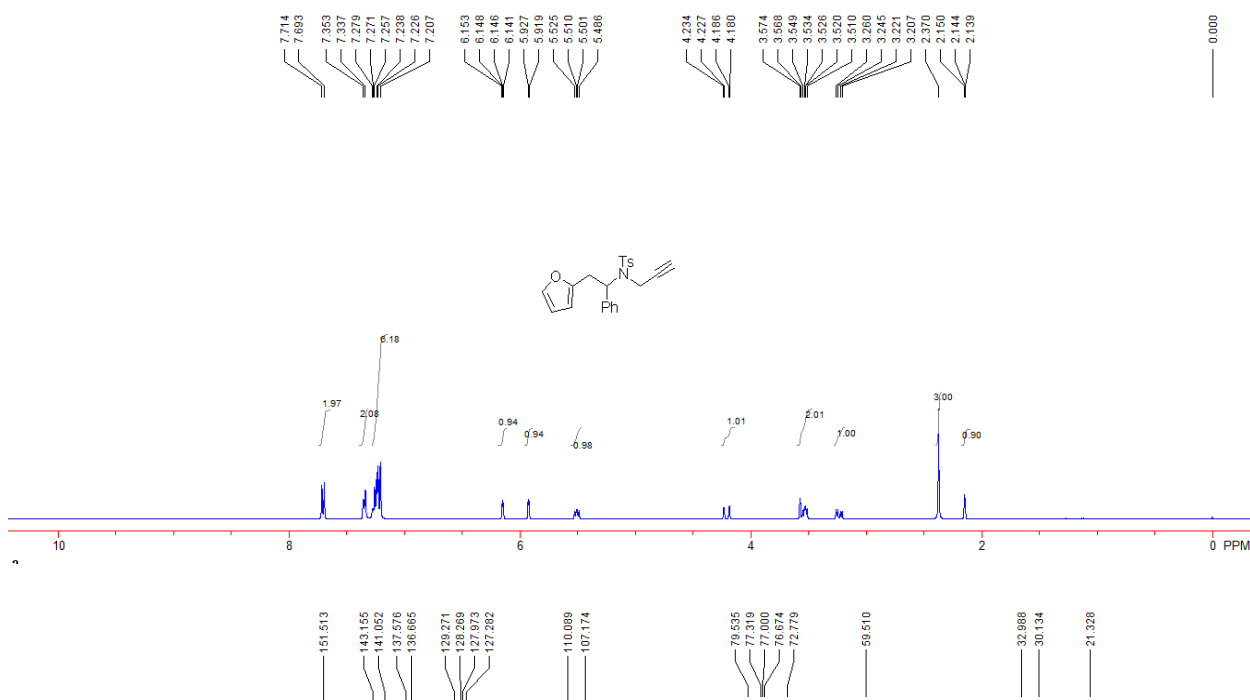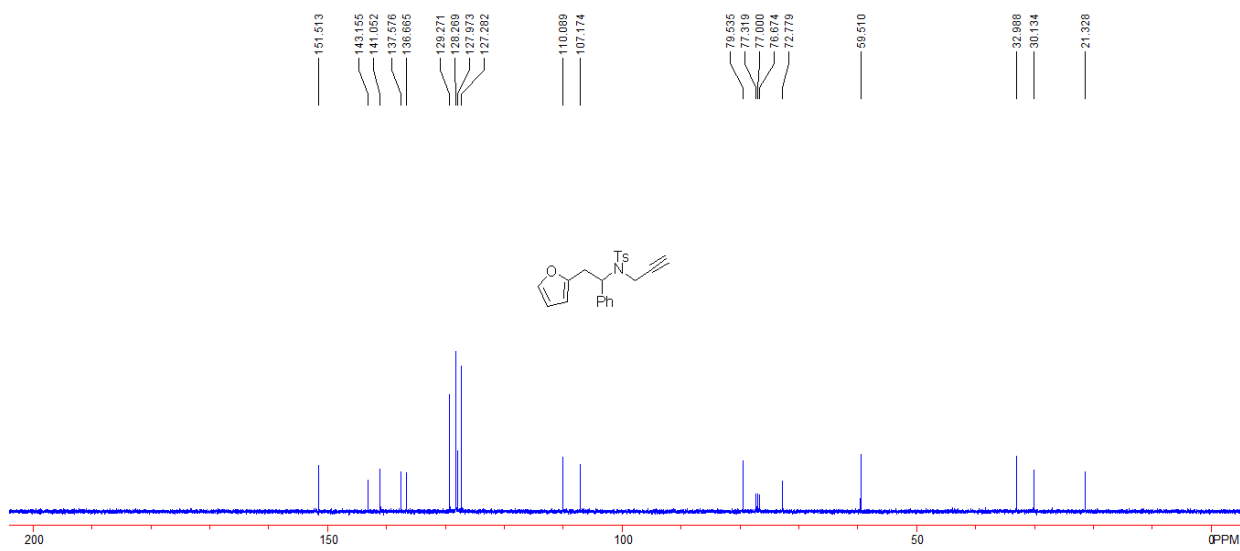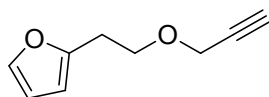

## 2-(2-(prop-2-yn-1-yloxy)ethyl)furan **4h**

For preparation and characterization of **4h**, see reference.<sup>[7]</sup>

## 4. General procedure for synthesis of **2**, **3**, **5** and **7** as well as their characterization

To a dried reaction tube with a reflux condenser was added CuBr (0.06 mmol), paraformaldehyde (0.50 mmol). Then, alkyne (0.20 mmol), dicyclohexylamine (0.36 mmol), and toluene (1.00 mL)



were added sequentially into this dried reaction tube under an argon atmosphere and the resulting mixture was stirred at 110 °C. Compound **7d** was stirred at 130 °C in a sealed tube. Compound **7e** and **7f** were stirred at 150 °C in a sealed tube. When the reaction was complete as monitored by TLC, the solution was concentrated under reduced pressure and the crude residue was purified by a silica gel flash column chromatography (eluent: petroleum ether / ethyl acetate = 15/1) to give the cycloadducts **2**, **3**, **5** and **7**.

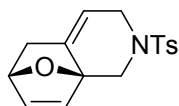

**(6S,8aS)-2-tosyl-2,3,5,6-tetrahydro-1H-6,8a-epoxyisoquinoline 2a**

A white solid, 18% yield (11 mg). M.p.: 163-165 °C. <sup>1</sup>H NMR (CDCl<sub>3</sub>, TMS, 400 MHz) δ 1.95 (ddd, *J* = 2.0, 3.6, 14.0 Hz, 1H, CH<sub>2</sub>), 2.43 (ddd, *J* = 2.0, 4.0, 14.0 Hz, 1H, CH<sub>2</sub>), 2.44 (s, 3H, CH<sub>3</sub>), 2.68 (d, *J* = 11.2 Hz, 1H, CH<sub>2</sub>), 3.15 (ddd, *J* = 2.4, 5.6, 16.0 Hz, 1H, CH<sub>2</sub>), 4.10 (ddd, *J* = 1.6, 3.6, 16.0 Hz, 1H, CH<sub>2</sub>), 4.40 (d, *J* = 11.2 Hz, 1H, CH<sub>2</sub>), 5.05 (dd, *J* = 1.6, 4.4 Hz, 1H, CH), 5.47 (ddd, *J* = 2.0, 3.6, 5.6 Hz, 1H, =CH), 6.37 (d, *J* = 6.0 Hz, 1H, =CH), 6.44 (d, *J* = 6.0 Hz, 1H, =CH), 7.34 (d, *J* = 8.0 Hz, 2H, ArH), 7.71 (d, *J* = 8.0 Hz, 2H, ArH). <sup>13</sup>C NMR (CDCl<sub>3</sub>, 100 MHz, TMS) δ 21.5, 31.3, 45.3, 46.0, 78.3, 83.1, 112.9, 127.6, 129.8, 133.4, 134.6, 135.5, 135.8, 143.8. IR (CH<sub>2</sub>Cl<sub>2</sub>) ν 2939, 2853, 1598, 1341, 1301, 1194, 1163, 1136, 1088, 1040, 1000, 945, 915, 830, 735, 709, 694, 662 cm<sup>-1</sup>. MS (ESI) *m/z* (%): 304.1 (100) [M<sup>+</sup>+H]; HRMS (ESI) Calcd. For C<sub>16</sub>H<sub>18</sub>NO<sub>3</sub>S<sup>+</sup>(M<sup>+</sup>+H) requires 304.1002, Found: 304.1009.

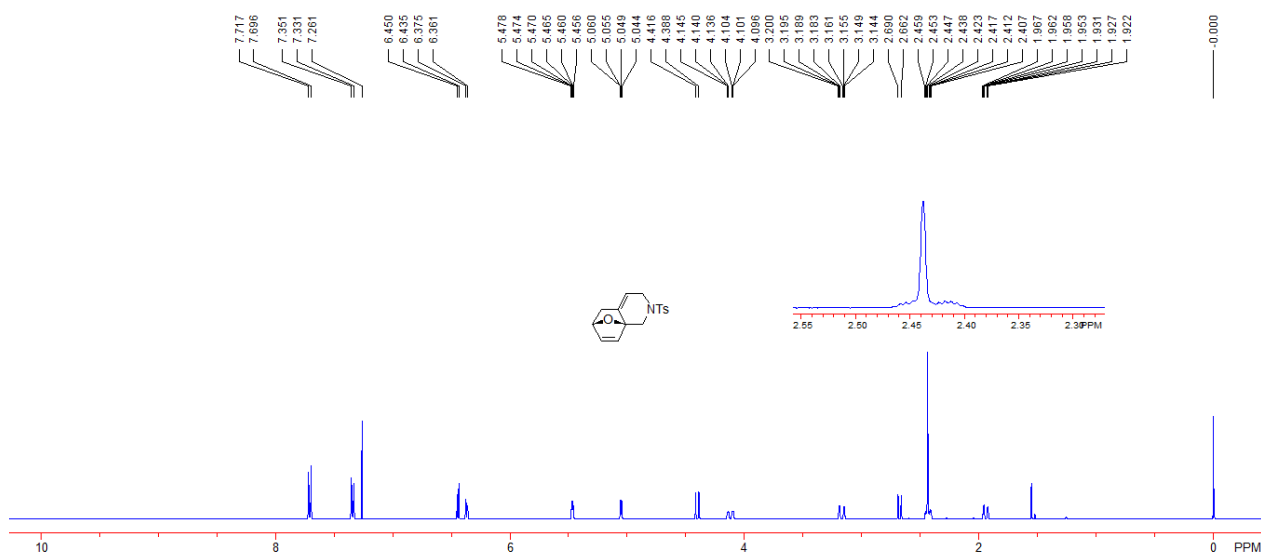

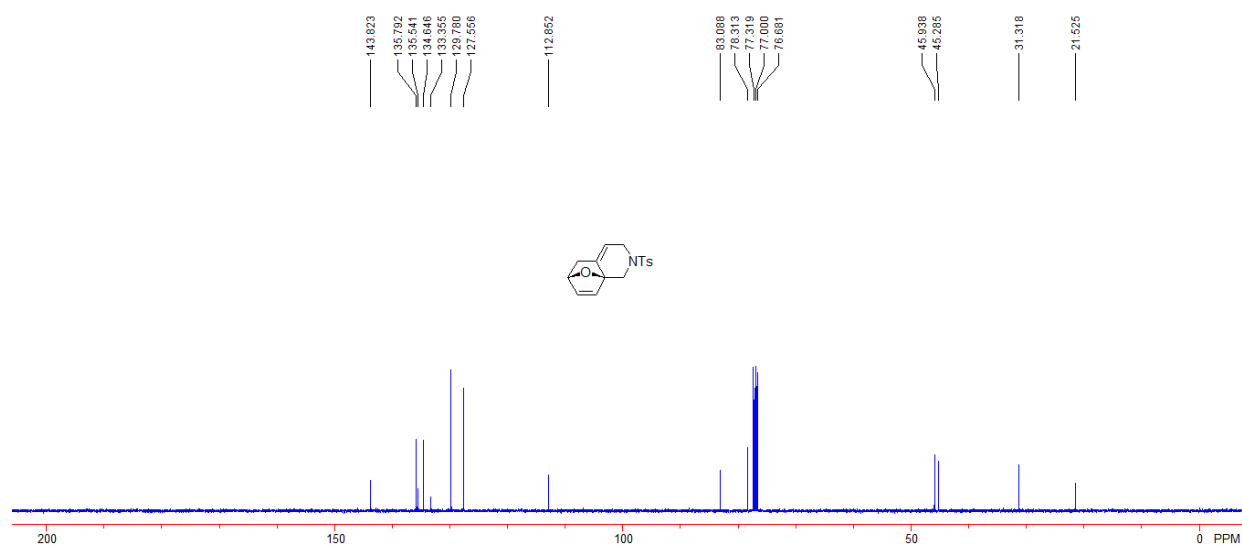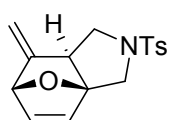

**(3a*S*,6*R*,7a*S*)-7-methylene-2-tosyl-1,2,3,6,7,7a-hexahydro-3a,6-epoxyisoindole 3a**

A white solid, 68% yield (41 mg). M.p.: 171-174 °C. <sup>1</sup>H NMR (CDCl<sub>3</sub>, TMS, 400 MHz) δ 2.42 (s, 3H, CH<sub>3</sub>), 2.58 (dd, *J* = 9.2, 9.2 Hz, 1H, CH), 2.81 (dd, *J* = 9.2, 9.2 Hz, 1H, CH<sub>2</sub>), 3.51 (d, *J* = 12.0 Hz, 1H, CH<sub>2</sub>), 3.90 (dd, *J* = 9.2, 9.2 Hz, 1H, CH<sub>2</sub>), 3.94 (d, *J* = 12.0 Hz, 1H, CH<sub>2</sub>), 4.92 (d, *J* = 1.2 Hz, 2H, =CH<sub>2</sub>), 5.12 (s, 1H, CH), 6.35 (d, *J* = 6.0 Hz, 1H, =CH), 6.43 (d, *J* = 6.0 Hz, 1H, =CH), 7.31 (d, *J* = 8.0, 2H, ArH), 7.71 (d, *J* = 8.0 Hz, 2H, ArH). <sup>13</sup>C NMR (CDCl<sub>3</sub>, 100 MHz, TMS) δ 21.3, 47.4, 49.2, 51.3, 83.6, 96.0, 107.5, 127.2, 129.5, 133.4, 133.8, 136.3, 143.3, 145.3. IR (CH<sub>2</sub>Cl<sub>2</sub>) ν 2929, 2875, 1676, 1597, 1492, 1455, 1371, 1339, 1306, 1289, 1181, 1163, 1106, 1062, 998, 924, 898, 818, 708, 664, 656 cm<sup>-1</sup>. MS (ESI) *m/z* (%): 304.1 (100) [M<sup>+</sup>+H]; HRMS (ESI) Calcd. For C<sub>16</sub>H<sub>18</sub>NO<sub>3</sub>S<sup>+1</sup>(M<sup>+</sup>+H) requires 304.1002, Found: 304.1009.

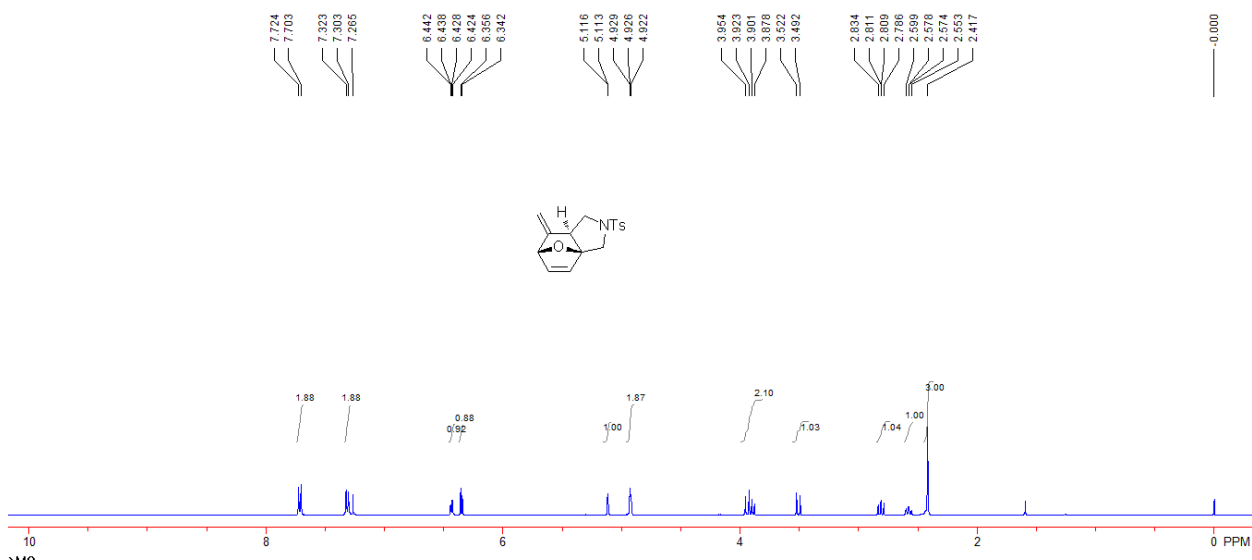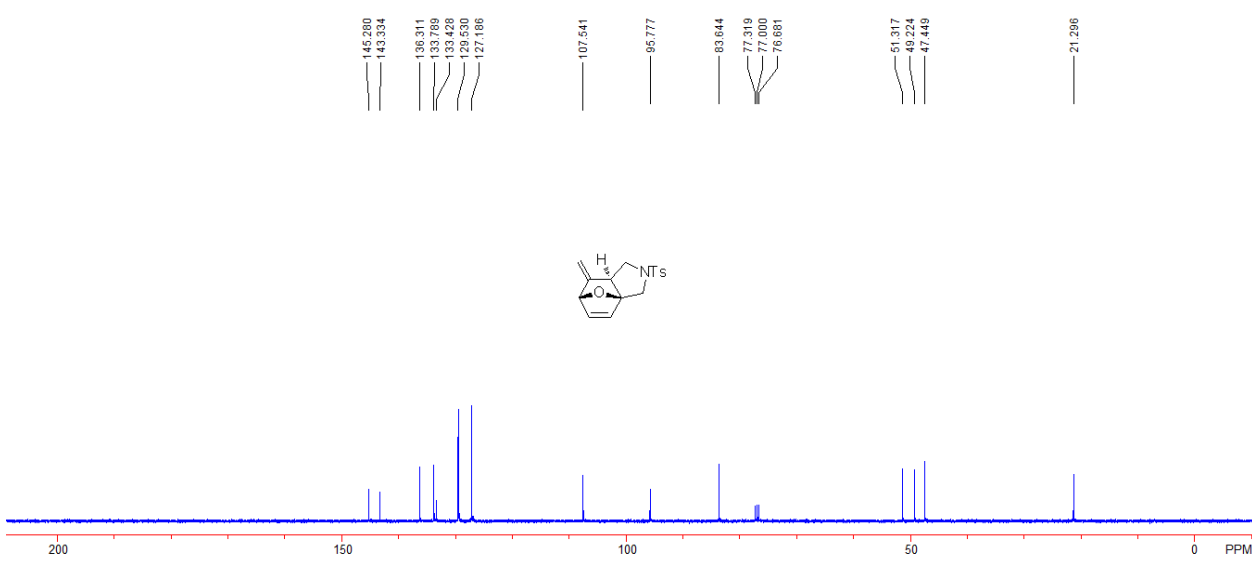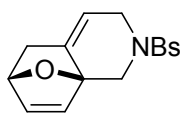

**(6S,8aS)-2-((4-bromophenyl) sulfonyl)-2,3,5,6-tetrahydro-1H-6,8a-epoxyisoquinoline 2b**

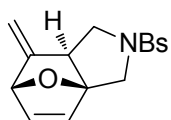

**(3aS,6R,7aS)-2-((4-bromophenyl)sulfonyl)-7-methylene-1,2,3,6,7,7a-hexahydro-3a,6-epoxyisoindole 3b**

A White solid, 63% yield (46 mg). Ratio (**2b**/**3b**) = 1/4. M.p.: 160-163 °C. Minor product **2b**, diagnostic peaks: <sup>1</sup>H NMR (CDCl<sub>3</sub>, TMS, 400 MHz) δ 1.95 (dd, *J* = 1.6, 14.0 Hz, 1H, CH<sub>2</sub>), 2.43 (ddd, *J* = 2.0, 4.0, 14.0 Hz, 1H, CH<sub>2</sub>), 2.72 (d, *J* = 11.2 Hz, 1H, CH<sub>2</sub>), 3.19 (dd, *J* = 2.0, 16.0 Hz,

1H, CH<sub>2</sub>), 4.12 (dd, *J* = 1.6, 16.0 Hz, 1H, CH<sub>2</sub>), 4.39 (d, *J* = 11.2 Hz, 1H, CH<sub>2</sub>), 5.06 (dd, *J* = 1.6, 4.0 Hz, 1H, CH), 5.47 (dd, *J* = 1.6, 4.0 Hz, 1H, =CH), 6.38 (d, *J* = 5.6 Hz, 1H, =CH), 6.42 (d, *J* = 5.6 Hz, 1H, =CH), 7.65 (d, *J* = 8.8 Hz, 2H, ArH), 7.69 (d, *J* = 8.8 Hz, 2H, ArH). Major product **3b**: <sup>1</sup>H NMR (CDCl<sub>3</sub>, TMS, 400 MHz) δ 2.61 (dd, *J* = 9.2, 9.2 Hz, 1H, CH), 2.81 (dd, *J* = 9.2, 9.2 Hz, 1H, CH<sub>2</sub>), 3.52 (d, *J* = 12.0 Hz, 1H, CH<sub>2</sub>), 3.91 (dd, *J* = 9.2, 9.2 Hz, 1H, CH<sub>2</sub>), 3.94 (d, *J* = 12.0 Hz, 1H, CH<sub>2</sub>), 4.94 (s, 2H, =CH<sub>2</sub>), 5.12 (d, *J* = 1.2 Hz, 1H, CH), 6.35 (d, *J* = 6.0 Hz, 1H, =CH), 6.45 (dd, *J* = 1.2, 6.0 Hz, 1H, =CH), 7.65 (d, *J* = 8.8 Hz, 2H, ArH), 7.69 (d, *J* = 8.8 Hz, 2H, ArH). <sup>13</sup>C NMR (CDCl<sub>3</sub>, 100 MHz, TMS) δ 47.6, 49.5, 51.5, 83.8, 95.8, 107.9, 127.8, 128.9, 132.4, 133.7, 134.4, 136.7, 145.3. IR (CH<sub>2</sub>Cl<sub>2</sub>) ν 2954, 2924, 2853, 1574, 1470, 1389, 1347, 1165, 1068, 1009, 996, 772, 741, 705 cm<sup>-1</sup>. MS (MALDI) *m/z* (%): 367.9 (100) [M<sup>+</sup>+H]; HRMS (MALDI) Calcd. For C<sub>15</sub>H<sub>15</sub>NO<sub>3</sub>BrS<sup>+</sup>(M<sup>+</sup>+H) requires 367.9951, Found: 367.9948.

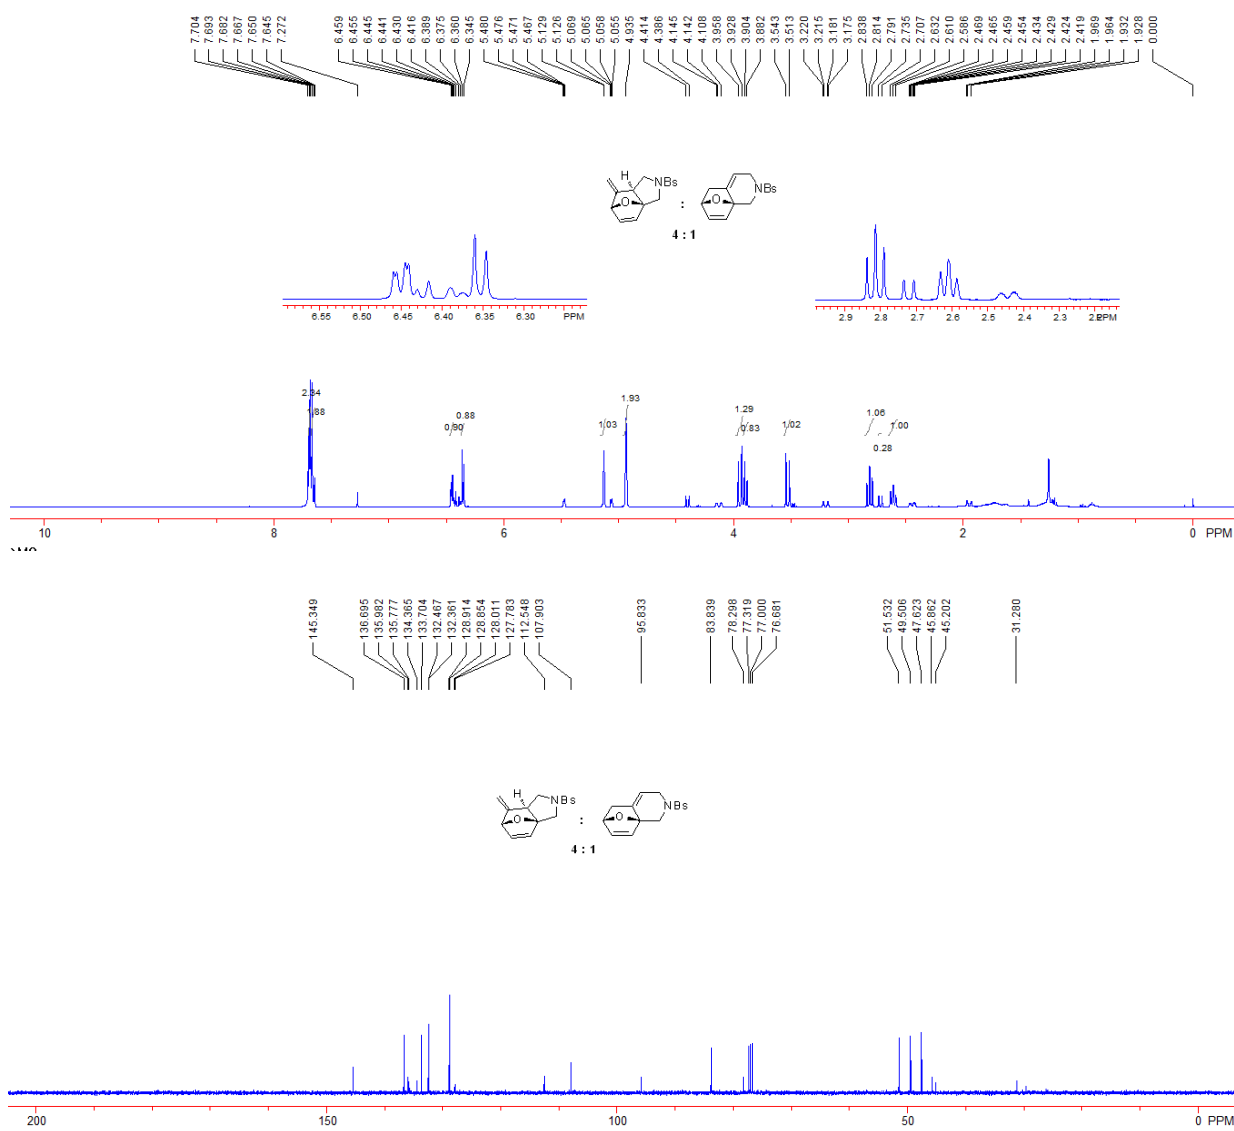

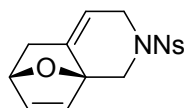

**(6S,8aS)-2-((4-nitrophenyl)sulfonyl)-2,3,5,6-tetrahydro-1H-6,8a-epoxyisoquinoline 2c**

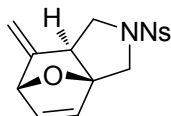

**(3aS,6R)-7-methylene-2-((4-nitrophenyl)sulfonyl)-1,2,3,6,7,7a-hexahydro-3a,6-epoxyisoindole 3c**

A Yellow solid, 80% yield (51 mg). Ratio (**2c**/**3c**) = 1/5. M.p.: 175-178 °C. Minor product **2c**, diagnostic peaks:  $^1\text{H}$  NMR ( $\text{CDCl}_3$ , TMS, 400 MHz)  $\delta$  1.96 (dd,  $J = 1.6, 14.0$  Hz, 1H,  $\text{CH}_2$ ), 2.45 (ddd,  $J = 2.0, 4.0, 14.0$  Hz, 1H,  $\text{CH}_2$ ), 2.80 (d,  $J = 11.6$  Hz, 1H,  $\text{CH}_2$ ), 3.27 (dd,  $J = 2.0, 16.0$  Hz, 1H,  $\text{CH}_2$ ), 4.19 (d,  $J = 16.0$  Hz, 1H,  $\text{CH}_2$ ), 4.46 (d,  $J = 11.6$  Hz, 1H,  $\text{CH}_2$ ), 5.07 (d,  $J = 4.0$  Hz, 1H, CH), 5.49 (dd,  $J = 1.6, 4.4$  Hz, 1H, =CH), 6.38 (d,  $J = 5.6$  Hz, 1H, =CH), 6.42 (d,  $J = 5.6$  Hz, 1H, =CH), 8.01 (d,  $J = 8.8$  Hz, 2H, ArH), 8.40 (d,  $J = 8.8$  Hz, 2H, ArH). Major product **3c**:  $^1\text{H}$  NMR ( $\text{CDCl}_3$ , TMS, 400 MHz)  $\delta$  2.66 (dd,  $J = 9.2, 9.6$  Hz, 1H,  $\text{CH}_2$ ), 2.84 (dd,  $J = 9.2, 9.2$  Hz, 1H,  $\text{CH}_2$ ), 3.59 (d,  $J = 12.4$  Hz, 1H,  $\text{CH}_2$ ), 3.97 (dd,  $J = 9.2, 9.2$  Hz, 1H, CH), 3.99 (d,  $J = 12.4$  Hz, 1H,  $\text{CH}_2$ ), 4.91 (s, 1H, = $\text{CH}_2$ ), 4.95 (s, 1H, = $\text{CH}_2$ ), 5.14 (s, 1H, CH), 6.35 (d,  $J = 5.6$  Hz, 1H, =CH), 6.46 (d,  $J = 5.6$  Hz, 1H, =CH), 8.01 (d,  $J = 8.8$  Hz, 2H, ArH), 8.37 (d,  $J = 8.8$  Hz, 2H, ArH).  $^{13}\text{C}$  NMR ( $\text{CDCl}_3$ , 100 MHz, TMS)  $\delta$  47.5, 49.6, 51.7, 83.8, 95.7, 108.1, 124.3, 128.5, 133.3, 134.1, 136.9, 142.6, 145.3. IR ( $\text{CH}_2\text{Cl}_2$ )  $\nu$  3105, 2934, 2874, 1528, 1349, 1308, 1166, 1108, 1044, 998, 855, 830, 738, 699  $\text{cm}^{-1}$ . MS (MALDI)  $m/z$  (%): 357.0 (100) [ $\text{M}^+ + \text{Na}$ ]; HRMS (MALDI) Calcd. For  $\text{C}_{15}\text{H}_{14}\text{N}_2\text{O}_5\text{NaS}^+$  ( $\text{M}^+ + \text{Na}$ ) requires 357.0516, Found: 357.0511.

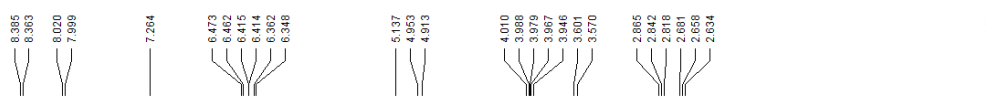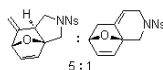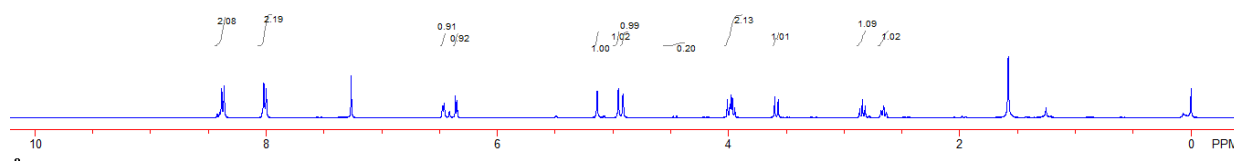

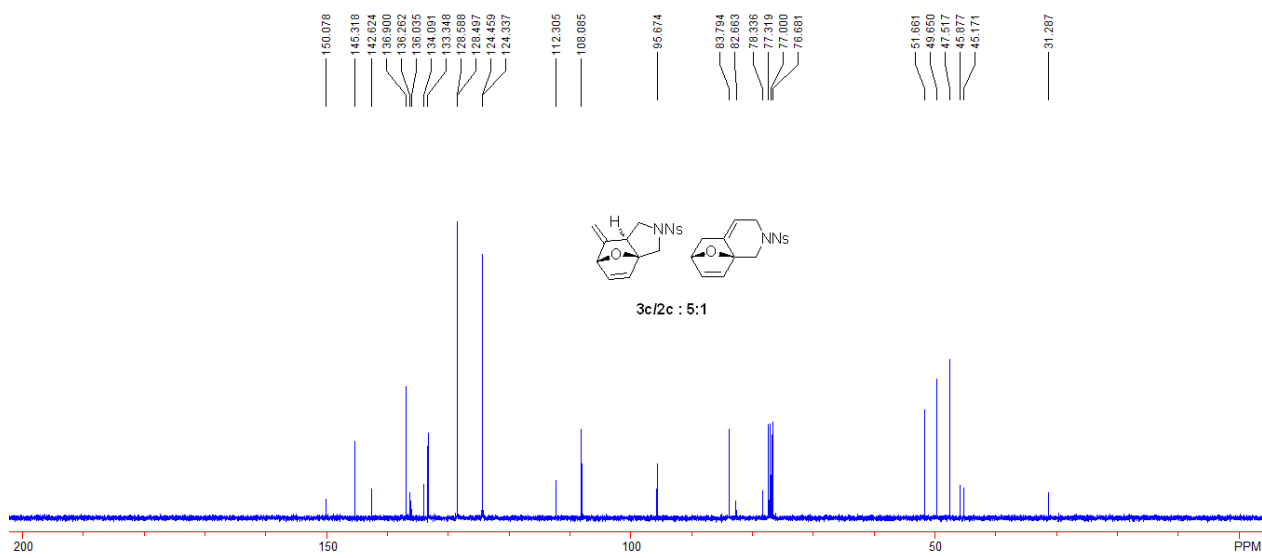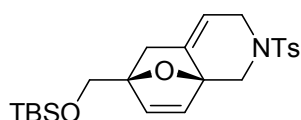

**(6S,8aS)-6-(((tert-butyl dimethylsilyl)oxy)methyl)-2-tosyl-2,3,5,6-tetrahydro-1H-6,8a-epoxyisoquinoline 2d**

A White solid, 30% yield (29 mg). M.p.: 81-83 °C. <sup>1</sup>H NMR (CDCl<sub>3</sub>, TMS, 400 MHz) δ 0.07 (s, 3H, CH<sub>3</sub>), 0.08 (s, 3H, CH<sub>3</sub>), 0.90 (s, 9H, C(CH<sub>3</sub>)<sub>3</sub>), 1.98 (dd, *J* = 1.6, 14.0 Hz, 1H, CH<sub>2</sub>), 2.36 (dd, *J* = 1.6, 14.0 Hz, 1H, CH<sub>2</sub>), 2.43 (s, 3H, CH<sub>3</sub>), 2.66 (d, *J* = 11.2 Hz, 1H, CH<sub>2</sub>), 3.16 (dd, *J* = 2.0, 16.0 Hz, 1H, CH<sub>2</sub>), 4.02 (s, 2H, CH<sub>2</sub>), 4.09 (d, *J* = 1.6 Hz, 1H, CH<sub>2</sub>), 4.37 (d, *J* = 11.2 Hz, 1H, CH<sub>2</sub>), 5.43 (dd, *J* = 1.6, 3.2 Hz, 1H, =CH), 6.29 (d, *J* = 5.6 Hz, 1H, =CH), 6.45 (d, *J* = 5.6 Hz, 1H, =CH), 7.33 (d, *J* = 8.0 Hz, 2H, ArH), 7.69 (d, *J* = 8.0 Hz, 2H, ArH). <sup>13</sup>C NMR (CDCl<sub>3</sub>, 100 MHz, TMS) δ -5.4, 18.4, 21.5, 25.8, 32.9, 45.2, 45.9, 63.0, 83.6, 90.1, 112.2, 127.5, 129.7, 133.2, 135.4, 136.2, 137.5, 143.8. IR (CH<sub>2</sub>Cl<sub>2</sub>) ν 2955, 2927, 2856, 1597, 1461, 1354, 1331, 1258, 1169, 1090, 1053, 1029, 949, 839, 813, 765, 749, 712, 667 cm<sup>-1</sup>. MS (ESI) *m/z* (%): 465.2 (100) [M<sup>+</sup>+NH<sub>4</sub>]; HRMS (ESI) Calcd. For C<sub>23</sub>H<sub>37</sub>N<sub>2</sub>O<sub>4</sub>SSi<sup>+</sup>(M<sup>+</sup>+NH<sub>4</sub>) requires 465.2238, Found: 465.2239.

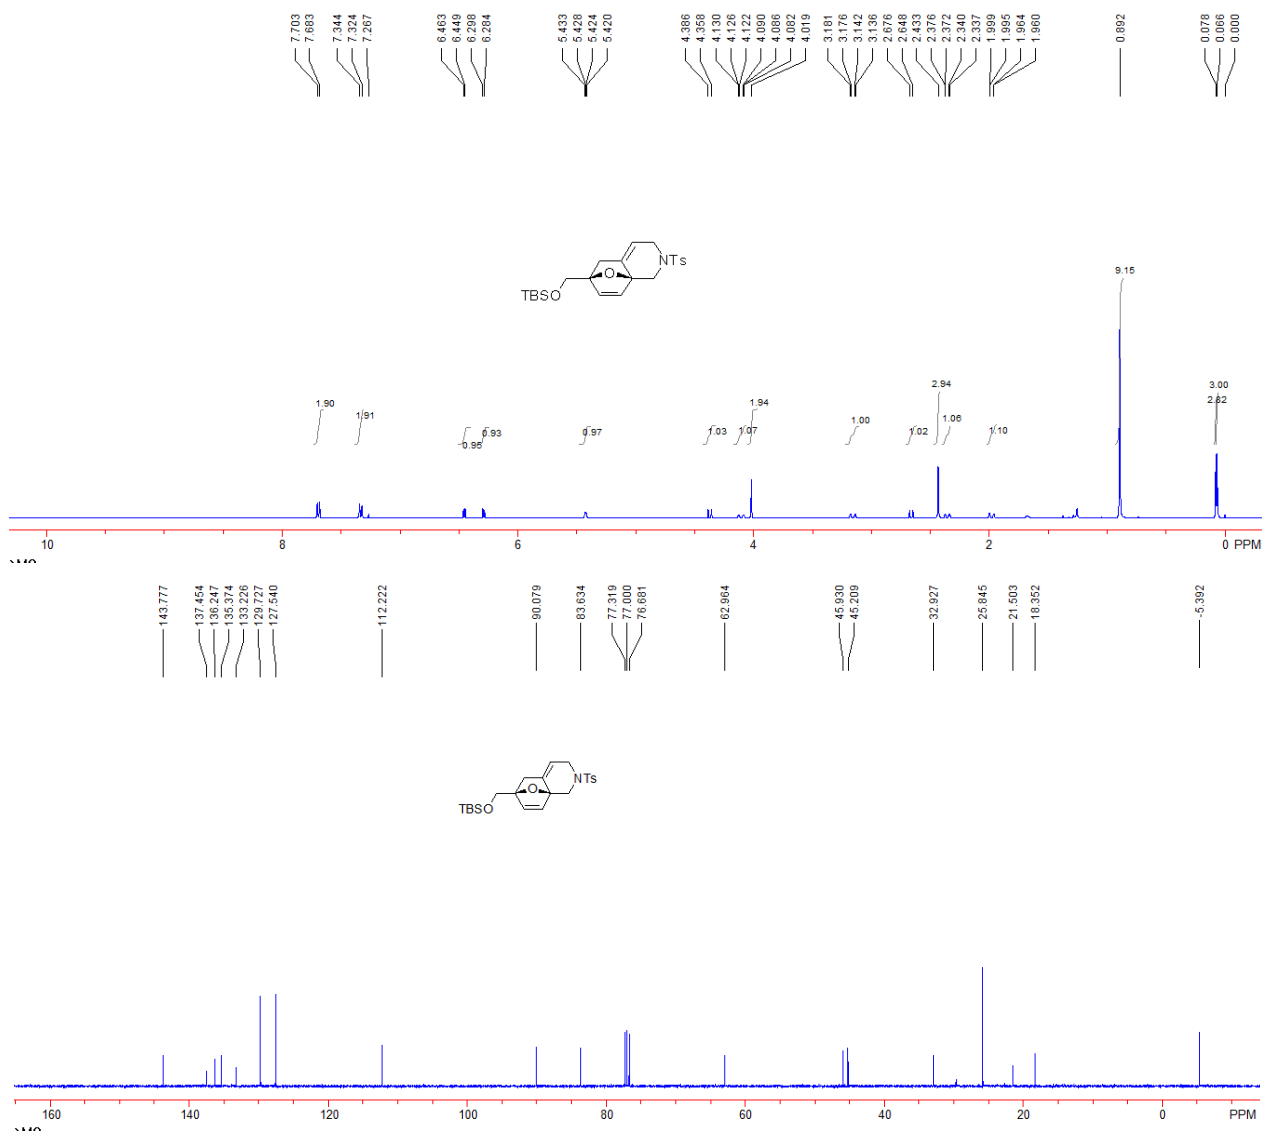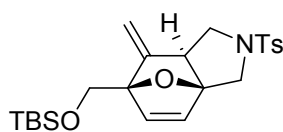

**(3a*S*,6*R*,7a*S*)-6-(((*tert*-butylidimethylsilyl)oxy)methyl)-7-methylene-2-tosyl-1,2,3,6,7,7a-hexahydro-3a,6-epoxyisoindole **3d****

A White solid, 30% yield (29 mg). M.p.: 120-123 °C. <sup>1</sup>H NMR (CDCl<sub>3</sub>, TMS, 400 MHz) δ -0.03 (s, 3H, CH<sub>3</sub>), -0.01 (s, 3H, CH<sub>3</sub>), 0.84 (s, 9H, CH<sub>3</sub>), 2.41 (s, 3H, CH<sub>3</sub>), 2.65 (dd, *J* = 8.4, 9.6 Hz, 1H, CH<sub>2</sub>), 2.79 (dd, *J* = 9.6, 10.0 Hz, 1H, CH<sub>2</sub>), 3.51 (d, *J* = 12.0 Hz, 1H, CH<sub>2</sub>), 3.84-3.91 (m, 3H, CH<sub>2</sub>), 4.03 (d, *J* = 12.0 Hz, 1H, CH<sub>2</sub>), 4.93 (d, *J* = 0.4 Hz, 1H, =CH<sub>2</sub>), 5.08 (d, *J* = 1.2 Hz, 1H, =CH<sub>2</sub>), 6.31 (d, *J* = 5.6, 1H, =CH), 6.34 (d, *J* = 5.6 Hz, 1H, =CH), 7.29 (d, *J* = 8.0 Hz, 2H, ArH), 7.69 (d, *J* = 8.0 Hz, 2H, ArH). <sup>13</sup>C NMR (CDCl<sub>3</sub>, 100 MHz, TMS) δ -5.5, -5.47, 18.2, 21.5, 25.8, 49.5, 50.0, 51.5, 61.1, 92.2, 94.3, 107.3, 127.4, 129.7, 133.7, 134.3, 137.2, 143.4, 146.5. IR

(CH<sub>2</sub>Cl<sub>2</sub>) v 2925, 2853, 1598, 1462, 1340, 1288, 1163, 1120, 1094, 999, 882, 859, 836, 814, 782, 697, 665 cm<sup>-1</sup>. MS (ESI) *m/z* (%): 465.2 (100) [M<sup>++</sup>NH<sub>4</sub>]; HRMS (ESI) Calcd. For C<sub>23</sub>H<sub>37</sub>N<sub>2</sub>O<sub>4</sub>SSi<sup>+1</sup>(M<sup>++</sup>NH<sub>4</sub>) requires 465.2238, Found: 465.2237.

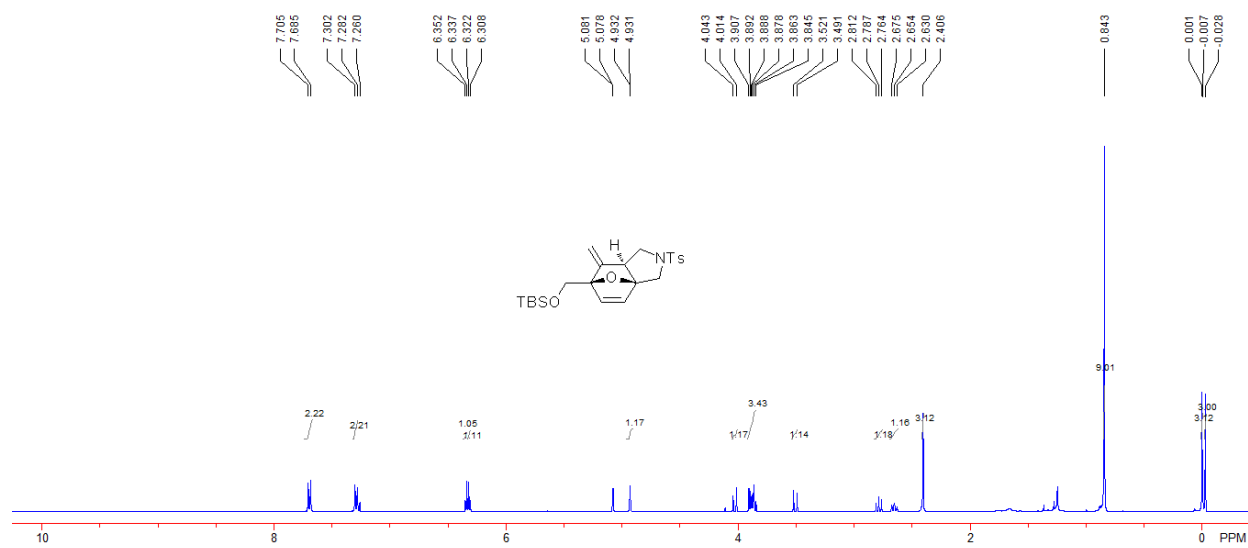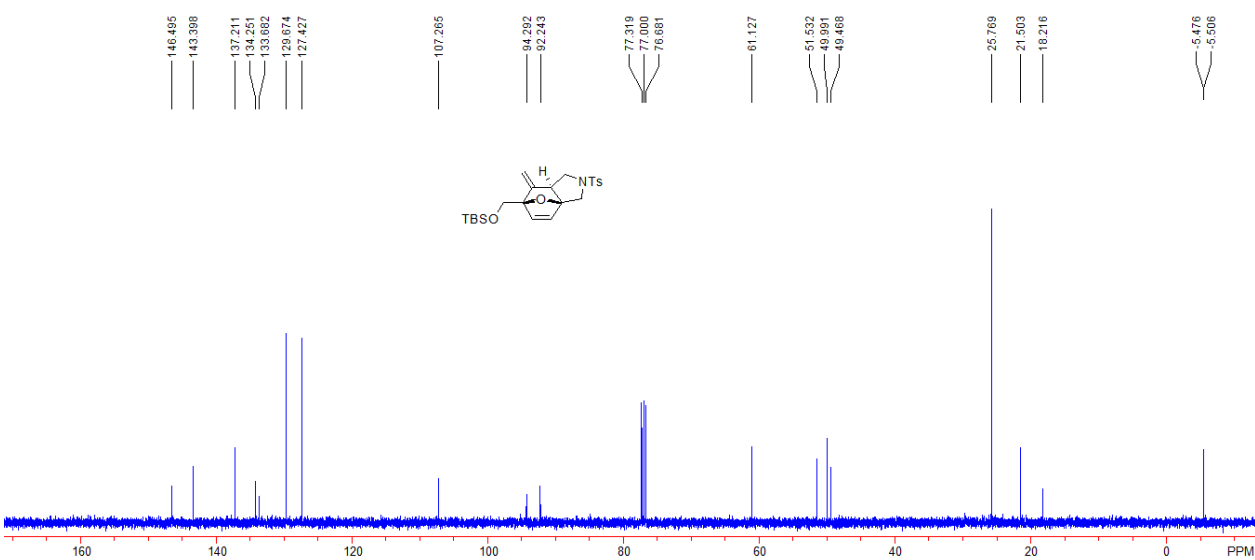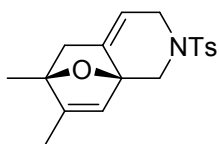

**(6S,8aS)-6,7-dimethyl-2-tosyl-2,3,5,6-tetrahydro-1H-6,8a-epoxyisoquinoline 2e**

A White solid, 12% yield (9 mg). M.p.: 121-124 °C. <sup>1</sup>H NMR (CDCl<sub>3</sub>, TMS, 400 MHz) δ 1.53 (s, 3H, CH<sub>3</sub>), 1.76 (s, 3H, CH<sub>3</sub>), 1.98 (d, *J* = 14.4 Hz, 1H, CH<sub>2</sub>), 2.10 (d, *J* = 14.4 Hz, 1H, CH<sub>2</sub>), 2.43 (s, 3H, CH<sub>3</sub>), 2.62 (d, *J* = 12.0 Hz, 1H, CH<sub>2</sub>), 3.14 (dd, *J* = 2.0, 15.6 Hz, 1H, CH<sub>2</sub>), 4.07 (dd, *J* = 0.4, 15.6 Hz, 1H, CH<sub>2</sub>), 4.31 (d, *J* = 10.8 Hz, 1H, CH<sub>2</sub>), 5.36 (d, *J* = 2.0 Hz, 1H, =CH), 6.01 (s,



1H, =CH), 7.32 (d,  $J = 8.0$  Hz, 2H, ArH), 7.68 (d,  $J = 8.0$  Hz, 2H, ArH).  $^{13}\text{C}$  NMR ( $\text{CDCl}_3$ , 100 MHz, TMS)  $\delta$  12.0, 17.0, 21.5, 36.8, 45.1, 46.2, 82.4, 87.5, 110.8, 127.5, 128.7, 129.7, 133.3, 140.0, 143.7, 147.7. IR ( $\text{CH}_2\text{Cl}_2$ )  $\nu$  2922, 2852, 1597, 1457, 1378, 1348, 1328, 1165, 1142, 1029, 1000, 948, 889, 831, 713, 695, 663  $\text{cm}^{-1}$ . MS (ESI)  $m/z$  (%): 349.1 (100) [ $\text{M}^+\text{+NH}_4$ ]; HRMS (ESI) Calcd. For  $\text{C}_{18}\text{H}_{25}\text{N}_2\text{O}_3\text{S}^+\text{(M}^+\text{+NH}_4)$  requires 349.1580, Found: 349.1590.

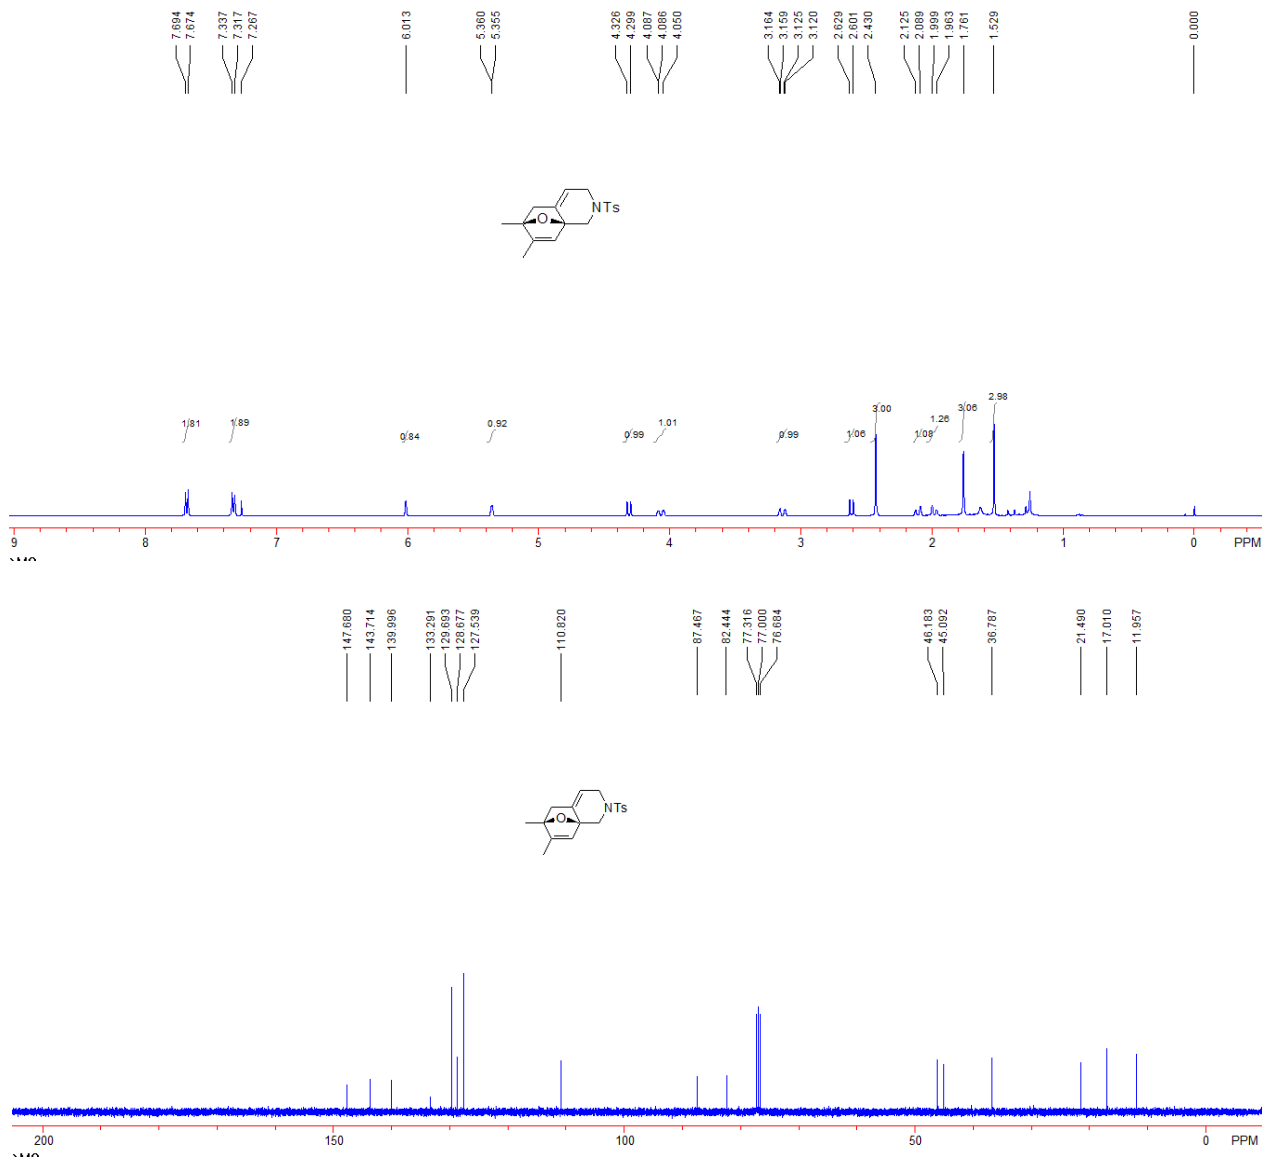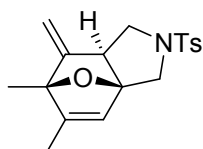

**(3aS,6R,7aS)-5,6-dimethyl-7-methylene-2-tosyl-1,2,3,6,7,7a-hexahydro-3a,6-epoxyisoindole 3e**

A white solid, 48% yield (31 mg). M.p.: 156-159 °C.  $^1\text{H}$  NMR ( $\text{CDCl}_3$ , TMS, 400 MHz)  $\delta$  1.42 (s, 3H,  $\text{CH}_3$ ), 1.71 (s, 3H,  $\text{CH}_3$ ), 2.41 (s, 3H,  $\text{CH}_3$ ), 2.67 (dd,  $J = 8.8, 9.2$  Hz, 1H,  $\text{CH}_2$ ), 2.82 (dd,  $J = 9.2, 9.6$  Hz, 1H,  $\text{CH}_2$ ), 3.46 (d,  $J = 12.0$  Hz, 1H,  $\text{CH}_2$ ), 3.81 (dd,  $J = 8.8, 9.2$  Hz, 1H, CH), 3.86 (d,  $J = 12.0$  Hz, 1H,  $\text{CH}_2$ ), 4.91 (s, 1H,  $=\text{CH}_2$ ), 4.97 (s, 1H,  $=\text{CH}_2$ ), 5.89 (s, 1H,  $=\text{CH}$ ), 7.30 (d,  $J = 8.0$  Hz, 2H, ArH), 7.70 (d,  $J = 8.0$  Hz, 2H, ArH).  $^{13}\text{C}$  NMR ( $\text{CDCl}_3$ , 100 MHz, TMS)  $\delta$  11.4, 13.9, 21.5, 49.5, 50.6, 51.7, 90.7, 92.8, 105.8, 127.4, 128.1, 129.7, 134.1, 143.4, 148.8, 149.9. IR ( $\text{CH}_2\text{Cl}_2$ )  $\nu$  2933, 1670, 1598, 1494, 1454, 1343, 1290, 1162, 1108, 1093, 1000, 886, 817, 781, 668  $\text{cm}^{-1}$ . MS (ESI)  $m/z$  (%): 332.1 (100)  $[\text{M}^++\text{H}]$ ; HRMS (ESI) Calcd. For  $\text{C}_{18}\text{H}_{22}\text{NO}_3\text{S}^+1(\text{M}^++\text{H})$  requires 332.1315, Found: 332.1322.

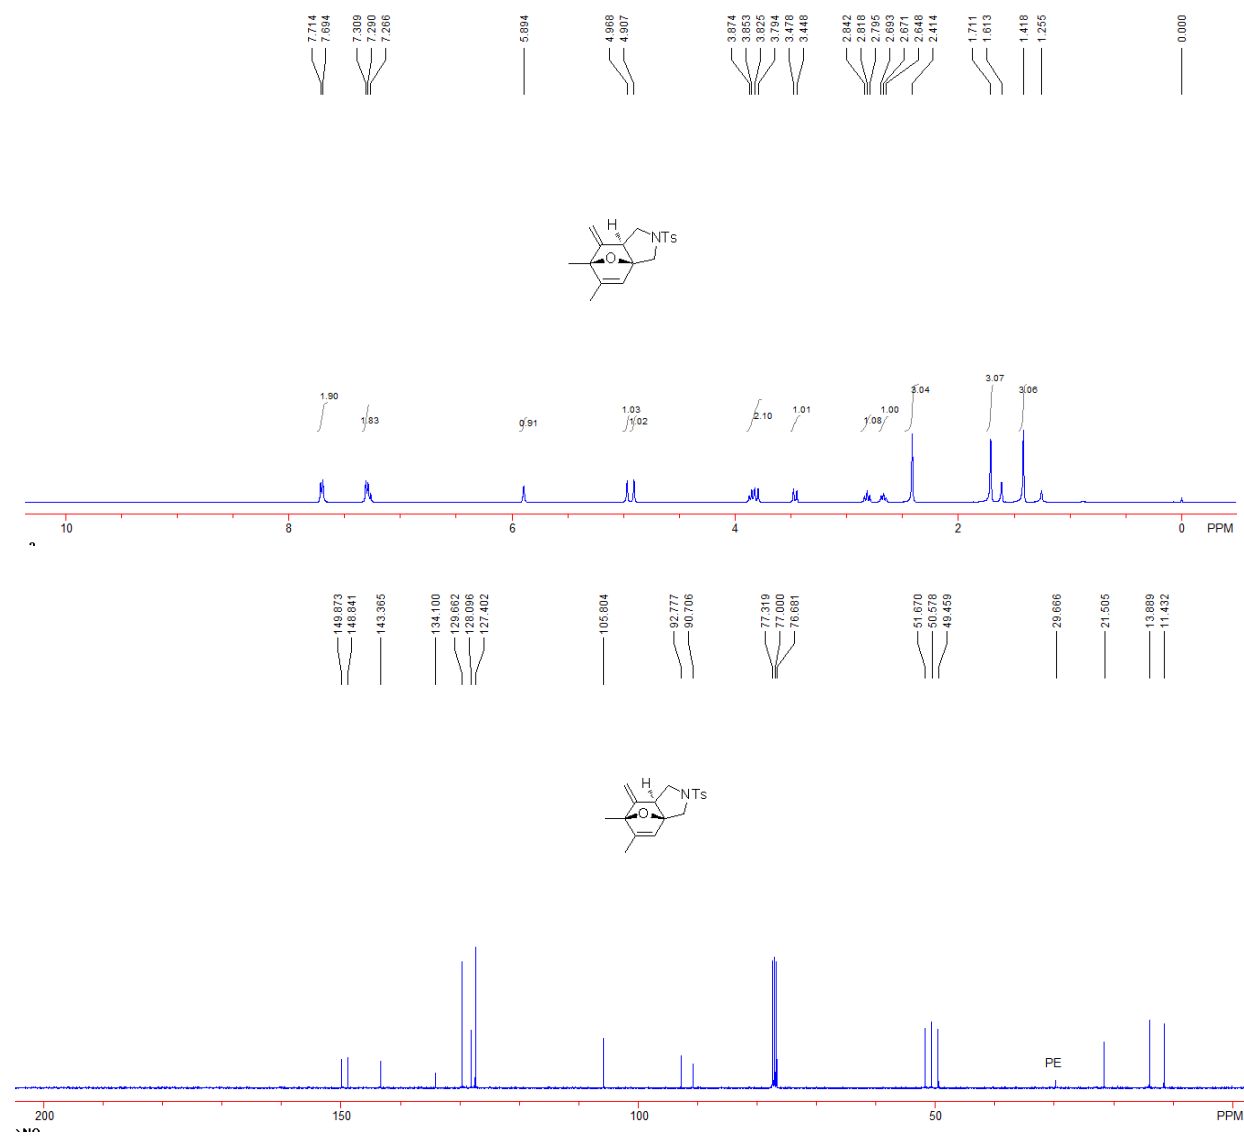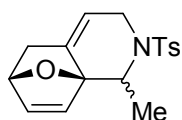

**(6S,8aS)-1-methyl-2-tosyl-2,3,5,6-tetrahydro-1H-6,8a-epoxyisoquinoline 2f**

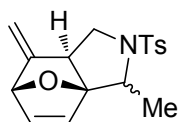

**(3aS, 6R, 7aS)-3-methyl-7-methylene-2-tosyl-1,2,3,6,7,7a-hexahydro-3a,6-epoxyisoindole 3f**

A white solid. 81% yield (51 mg). Ratio (**2f**/**3f**) = 1/2. <sup>1</sup>H NMR (CDCl<sub>3</sub>, TMS, 400 MHz) select resonances for **2f** (showing as a mixture of diastereomers in 3/1 ratio) δ 0.85 (d, *J* = 6.8 Hz, 3H, CH<sub>3</sub>), 1.93 (ddd, *J* = 2.0, 3.6, 14.0 Hz, 1H, CH<sub>2</sub>), 2.44 (s, 3H, CH<sub>3</sub>), 2.45-2.49 (m, 1H, CH<sub>2</sub>), 3.46 (ddd, *J* = 2.4, 5.6, 16.0 Hz, 1H, CH<sub>2</sub>), 4.19 (ddd, *J* = 1.6, 3.6, 16.0 Hz, 1H, CH<sub>2</sub>), 4.72 (q, *J* = 6.8 Hz, 1H, CH), 5.03 (d, *J* = 3.6 Hz, 1H, CH), 5.51 (dd, *J* = 1.6, 3.6 Hz, 1H, =CH), 6.30 (s, 2H, =CH), 7.32 (d, *J* = 8.0 Hz, 2H, ArH), 7.74 (d, *J* = 8.0 Hz, 2H, ArH). <sup>13</sup>C NMR (CDCl<sub>3</sub>, 100 MHz, TMS) not recorded for mixture. <sup>1</sup>H NMR (CDCl<sub>3</sub>, TMS, 400 MHz) select resonances for **3f** (showing as a mixture of diastereomers in 2/1 ratio) δ 1.41 (d, *J* = 6.8 Hz, 3H, CH<sub>3</sub>), 2.12 (dd, *J* = 9.2, 10.0 Hz, 1H, CH<sub>2</sub>), 2.43 (s, 3H, CH<sub>3</sub>), 3.17 (dd, *J* = 10.4, 11.2 Hz, 1H, CH<sub>2</sub>), 3.92 (dd, *J* = 10.4, 11.2 Hz, 1H, CH<sub>2</sub>), 4.20 (q, *J* = 6.8 Hz, 1H, CH), 4.86 (s, 1H, =CH<sub>2</sub>), 5.04 (s, 1H, CH), 5.10 (d, *J* = 1.2 Hz, 1H, CH), 6.22 (d, *J* = 5.6 Hz, 1H, =CH), 6.44 (d, *J* = 5.6 Hz, 1H, =CH), 7.31 (d, *J* = 8.0 Hz, 2H, ArH), 7.76 (d, *J* = 8.0 Hz, 2H, ArH). <sup>13</sup>C NMR (CDCl<sub>3</sub>, 100 MHz, TMS) not recorded for mixture. IR (CH<sub>2</sub>Cl<sub>2</sub>) ν 2925, 1672, 1598, 1452, 1341, 1161, 1094, 1045, 960, 931, 779, 746, 699, 666, 655 cm<sup>-1</sup>. MS (ESI) *m/z* (%): 318.1 (100) [M<sup>+</sup>+H]; HRMS (ESI) Calcd. For C<sub>17</sub>H<sub>20</sub>NO<sub>3</sub>S<sup>+</sup>(M<sup>+</sup>+H) requires 318.1158, Found: 318.1161.

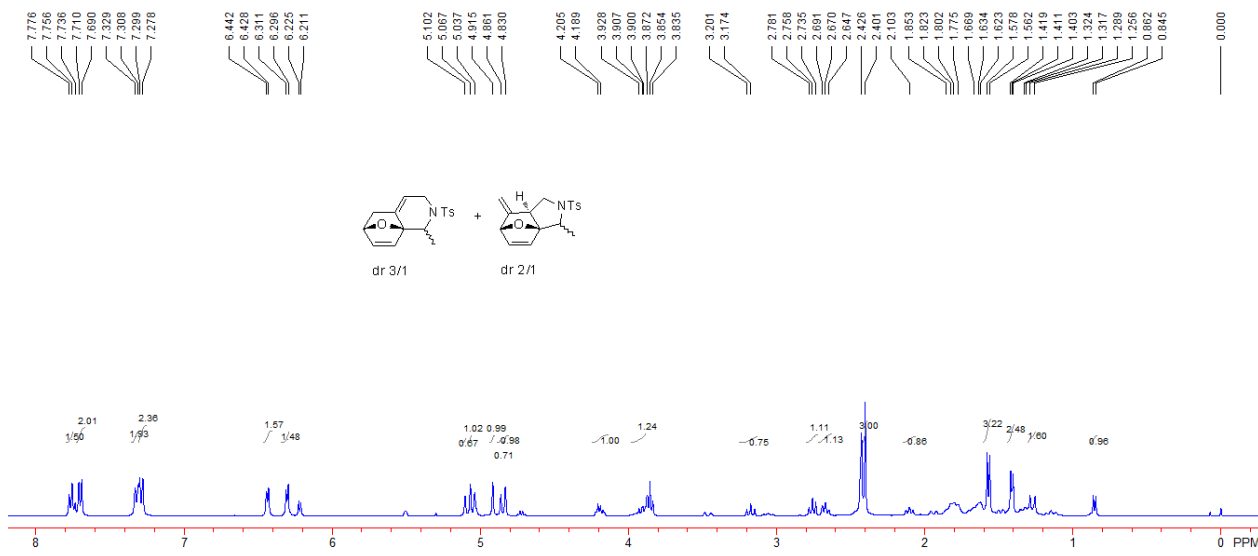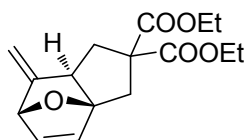

**(3aS,6R,7aR)-diethyl-7-methylene-1,6,7,7a-tetrahydro-3a,6-epoxyindene-2,2(3H)-dicarboxylate 3g**

A yellow liquid, 46% yield (28 mg).  $^1\text{H}$  NMR ( $\text{CDCl}_3$ , TMS, 400 MHz)  $\delta$  1.25 (t,  $J = 6.4$  Hz, 3H,  $\text{CH}_3$ ), 1.26 (t,  $J = 6.4$  Hz, 3H,  $\text{CH}_3$ ), 2.23 (dd,  $J = 10.8, 12.8$  Hz, 1H,  $\text{CH}_2$ ), 2.45 (dd,  $J = 8.4, 10.8$  Hz, 1H,  $\text{CH}_2$ ), 2.60 (dd,  $J = 8.4, 12.8$  Hz, 1H,  $\text{CH}_2$ ), 2.72 (d,  $J = 15.2$  Hz, 1H,  $\text{CH}_2$ ), 2.87 (d,  $J = 15.2$  Hz, 1H,  $\text{CH}_2$ ), 4.16-4.25 (m, 4H,  $\text{CH}_2$ ), 4.91 (s, 1H, CH), 4.98 (s, 1H,  $=\text{CH}_2$ ), 5.09 (s, 1H,  $=\text{CH}_2$ ), 6.40 (s, 2H,  $=\text{CH}$ ).  $^{13}\text{C}$  NMR ( $\text{CDCl}_3$ , 100 MHz, TMS)  $\delta$  14.0, 36.0, 38.1, 48.7, 61.6, 61.8, 63.0, 84.0, 98.3, 106.1, 135.7, 136.4, 149.3, 171.0, 172.5. IR ( $\text{CH}_2\text{Cl}_2$ )  $\nu$  2984, 2934, 2854, 1729, 1447, 1366, 1254, 1215, 1093, 931, 899, 766, 694  $\text{cm}^{-1}$ . MS (ESI)  $m/z$  (%): 293.0 (100) ( $\text{M}+\text{H}$ ) $^+$ ; HRMS (ESI) Calcd. for  $\text{C}_{16}\text{H}_{21}\text{O}_5^+(\text{M}+\text{H})^+$  requires 293.1384, Found: 293.1381.

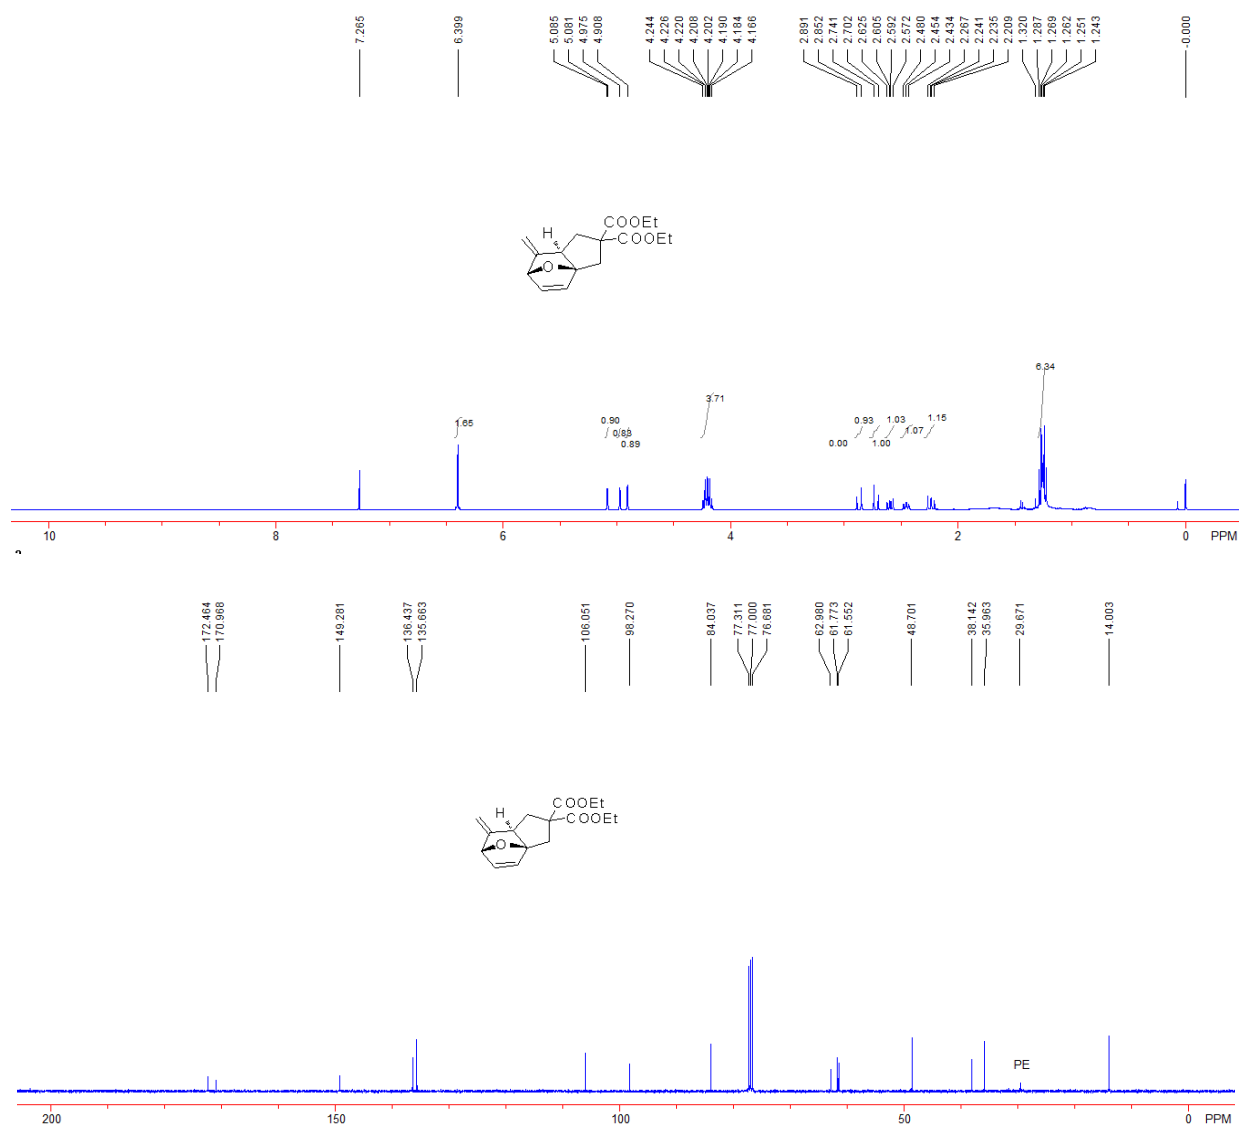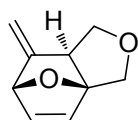

**(3aS,6R,7aS)-7-methylene-3,6,7,7a-tetrahydro-1H-3a,6-epoxyisobenzofuran 3h**

A yellow liquid, 14% yield (4 mg).  $^1\text{H}$  NMR ( $\text{CDCl}_3$ , TMS, 400 MHz)  $\delta$  2.66 (dd,  $J = 8.8, 9.2$  Hz, 1H, CH), 3.53 (dd,  $J = 8.8, 9.2$  Hz, 1H,  $\text{CH}_2$ ), 4.08 (d,  $J = 10.4$  Hz, 1H,  $\text{CH}_2$ ), 4.18 (dd,  $J = 8.8, 8.8$  Hz, 1H,  $\text{CH}_2$ ), 4.21 (d,  $J = 10.4$  Hz, 1H,  $\text{CH}_2$ ), 4.94 (s, 1H, CH), 5.09 (s, 1H,  $=\text{CH}_2$ ), 5.18 (s, 1H,  $=\text{CH}_2$ ), 6.46 (d,  $J = 5.6$  Hz, 1H,  $=\text{CH}$ ), 6.52 (d,  $J = 5.6$  Hz, 1H,  $=\text{CH}$ ).  $^{13}\text{C}$  NMR ( $\text{CDCl}_3$ , 100 MHz, TMS)  $\delta$  50.4, 68.0, 71.1, 84.5, 99.2, 107.5, 134.0, 136.6, 145.4. IR ( $\text{CH}_2\text{Cl}_2$ )  $\nu$  2923, 2853, 1717, 1653, 1507, 1452, 1149, 1080, 1014, 894, 799, 725, 695  $\text{cm}^{-1}$ . MS (EI)  $m/z$  (%): 81 (78), 91 (100), 92 (58), 120 (19), 121 (16), 150 (2) [ $\text{M}^+$ ]; HRMS (EI) Calcd. for  $\text{C}_9\text{H}_{10}\text{O}_2$  [ $\text{M}^+$ ] requires 150.0681, Found: 150.0683.

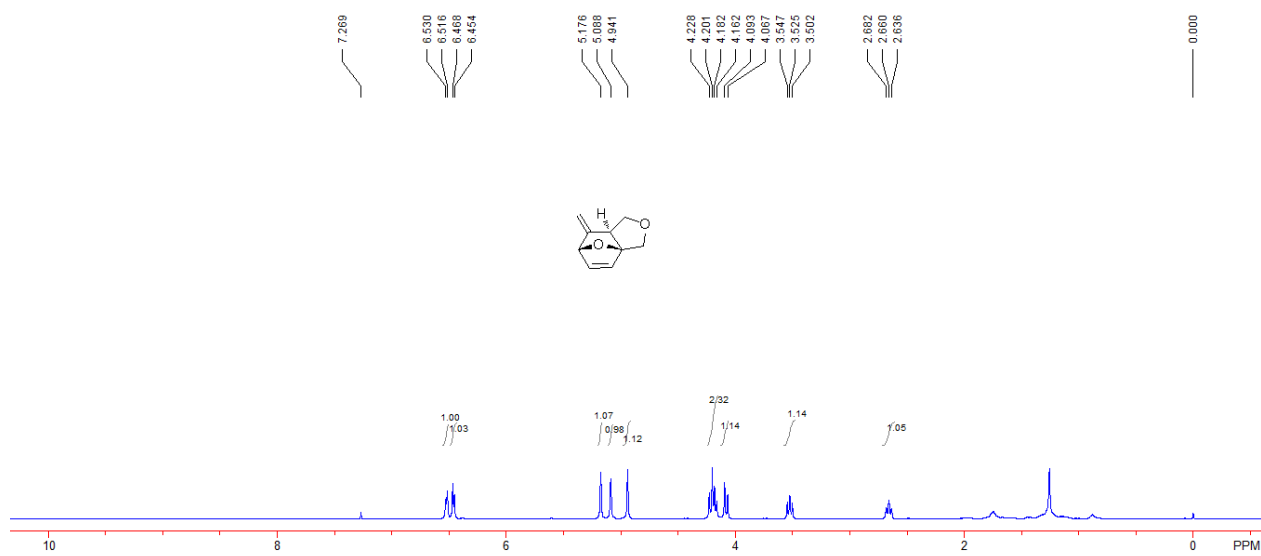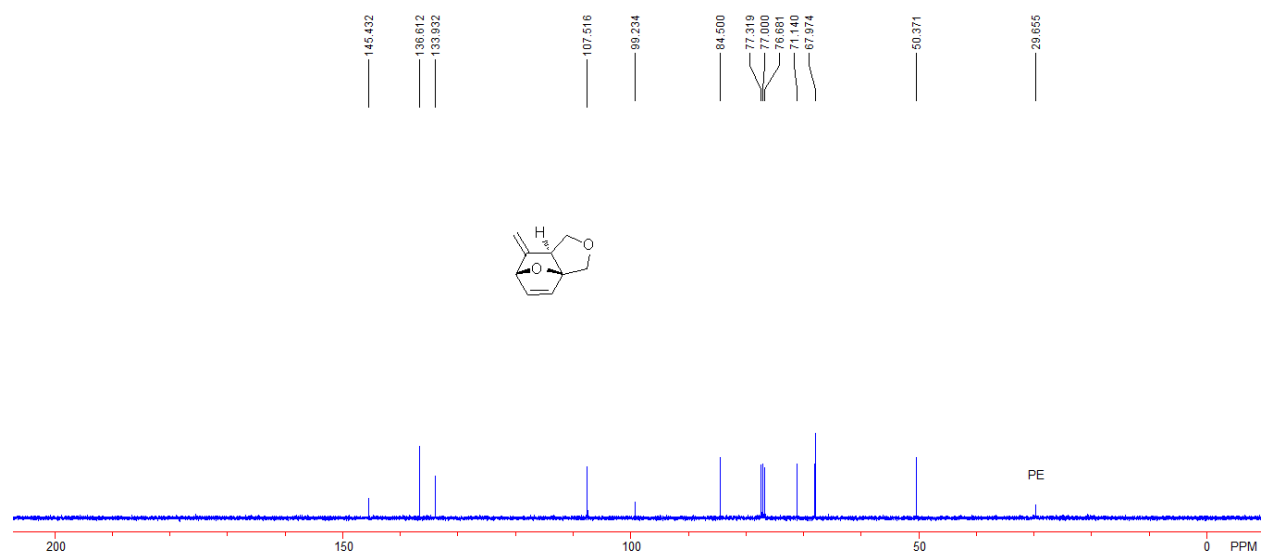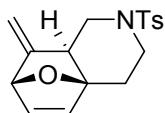

**(4aS,7R,8aS)-8-methylene-2-tosyl-2,3,4,7,8,8a-hexahydro-1H-4a,7-epoxyisoquinoline 5a**

A white solid, 85% yield (54 mg). M.p.: 123-126 °C. <sup>1</sup>H NMR (CDCl<sub>3</sub>, TMS, 400 MHz) δ 2.17 (dd, *J* = 11.6, 11.6 Hz, 1H, CH<sub>2</sub>), 2.19-2.23 (m, 1H, CH<sub>2</sub>), 2.36-2.41 (m, 3H, CH<sub>2</sub>), 2.42 (s, 3H, CH<sub>3</sub>), 3.76-3.79 (m, 1H, CH<sub>2</sub>), 3.97 (ddd, *J* = 1.6, 7.2, 10.0 Hz, 1H, CH<sub>2</sub>), 4.86 (s, 1H, =CH<sub>2</sub>), 4.90 (s, 1H, =CH<sub>2</sub>), 5.02 (s, 1H, CH), 6.08 (d, *J* = 5.6 Hz, 1H, =CH), 6.44 (d, *J* = 5.6 Hz, 1H, =CH), 7.31 (d, *J* = 8.0 Hz, 2H, ArH), 7.64 (d, *J* = 8.0 Hz, 2H, ArH). <sup>13</sup>C NMR (CDCl<sub>3</sub>, 100 MHz, TMS) δ 21.5, 28.2, 40.8, 42.9, 49.4, 82.9, 85.1, 105.4, 127.6, 129.7, 133.2, 136.5, 137.6, 143.6, 147.9. IR (CH<sub>2</sub>Cl<sub>2</sub>) ν 2928, 2857, 1661, 1593, 1463, 1341, 1302, 1165, 1140, 1090, 1016, 956, 928, 816, 740, 680, 659 cm<sup>-1</sup>. MS (ESI) *m/z* (%): 318.1 (100) [M<sup>+</sup>+H]; HRMS (ESI) Calcd. for C<sub>17</sub>H<sub>20</sub>NO<sub>3</sub>S<sup>+</sup>(M+H)<sup>+</sup> requires 318.1158, Found: 318.1159.

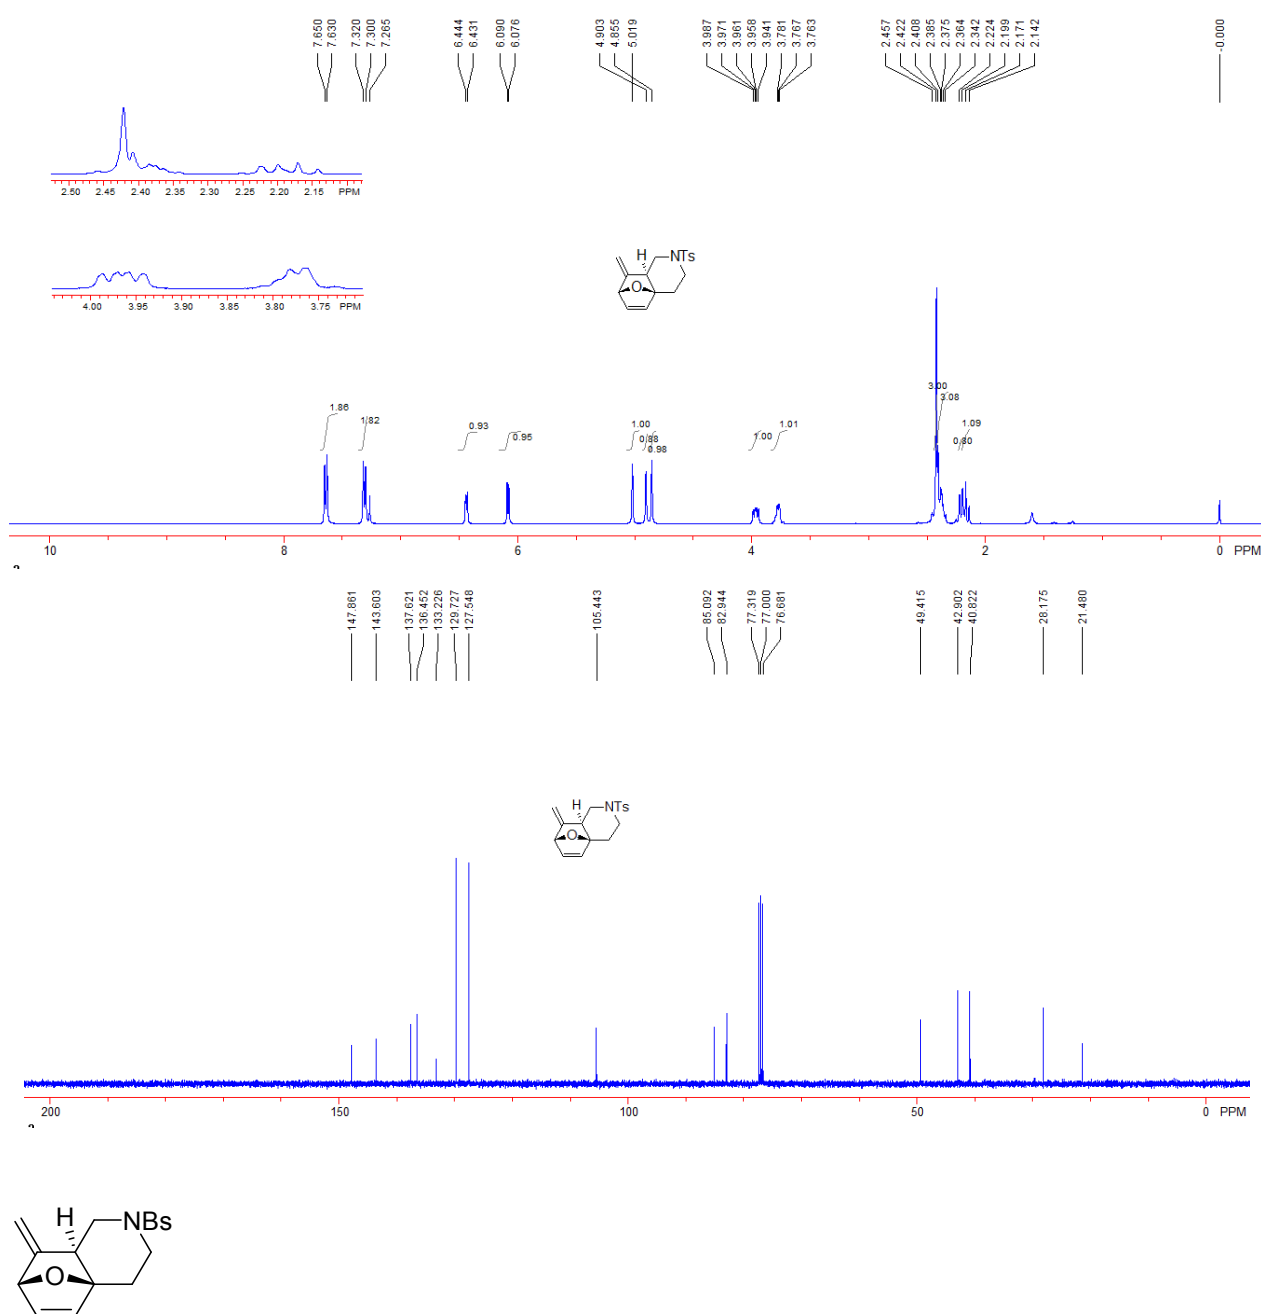

**(4aS,7R,8aS)-2-((4-bromophenyl)sulfonyl)-8-methylene-2,3,4,7,8,8a-hexahydro-1H-4a,7-epoxyisoquinoline 5b**

A white solid, 80% yield (61 mg). M.p.: 135-138 °C. <sup>1</sup>H NMR (CDCl<sub>3</sub>, TMS, 400 MHz) δ 2.18 (dd, *J* = 11.2, 11.6 Hz, 1H, CH<sub>2</sub>), 2.21-2.25 (m, 1H, CH<sub>2</sub>), 2.34-2.43 (m, 2H, CH<sub>2</sub>), 2.46 (td, *J* = 2.4, 13.2 Hz, 1H, CH<sub>2</sub>), 3.76-3.80 (m, 1H, CH<sub>2</sub>), 3.95 (ddd, *J* = 2.0, 7.6, 10.8 Hz, 1H, CH<sub>2</sub>), 4.86 (s, 1H, =CH<sub>2</sub>), 4.92 (s, 1H, =CH<sub>2</sub>), 5.03 (s, 1H, CH), 6.09 (d, *J* = 5.6 Hz, 1H, =CH), 6.43 (dd, *J* = 1.6 Hz, 5.6 Hz, 1H, =CH), 7.62 (d, *J* = 8.8 Hz, 2H, ArH), 7.67 (d, *J* = 8.8 Hz, 2H, ArH). <sup>13</sup>C NMR (CDCl<sub>3</sub>, 100 MHz, TMS) δ 28.1, 40.8, 42.9, 49.4, 82.9, 85.0, 105.6, 127.9, 129.0, 132.4, 135.4, 136.6, 137.5, 147.7. IR (CH<sub>2</sub>Cl<sub>2</sub>) ν 2927, 2856, 1660, 1574, 1463, 1349, 1165, 1087, 955, 927, 772, 751, 728, 678 cm<sup>-1</sup>. MS (EI) *m/z* (%): 42 (42.9), 81 (61.73), 134 (100), 162 (82.04), 221 (26.87), 302 (16.35), 381.0 (3.69) [M<sup>+</sup>]; HRMS (EI) Calcd. for C<sub>16</sub>H<sub>16</sub>NO<sub>3</sub>SBr<sup>+</sup>(M<sup>+</sup>) requires 381.0034, Found: 381.0033.

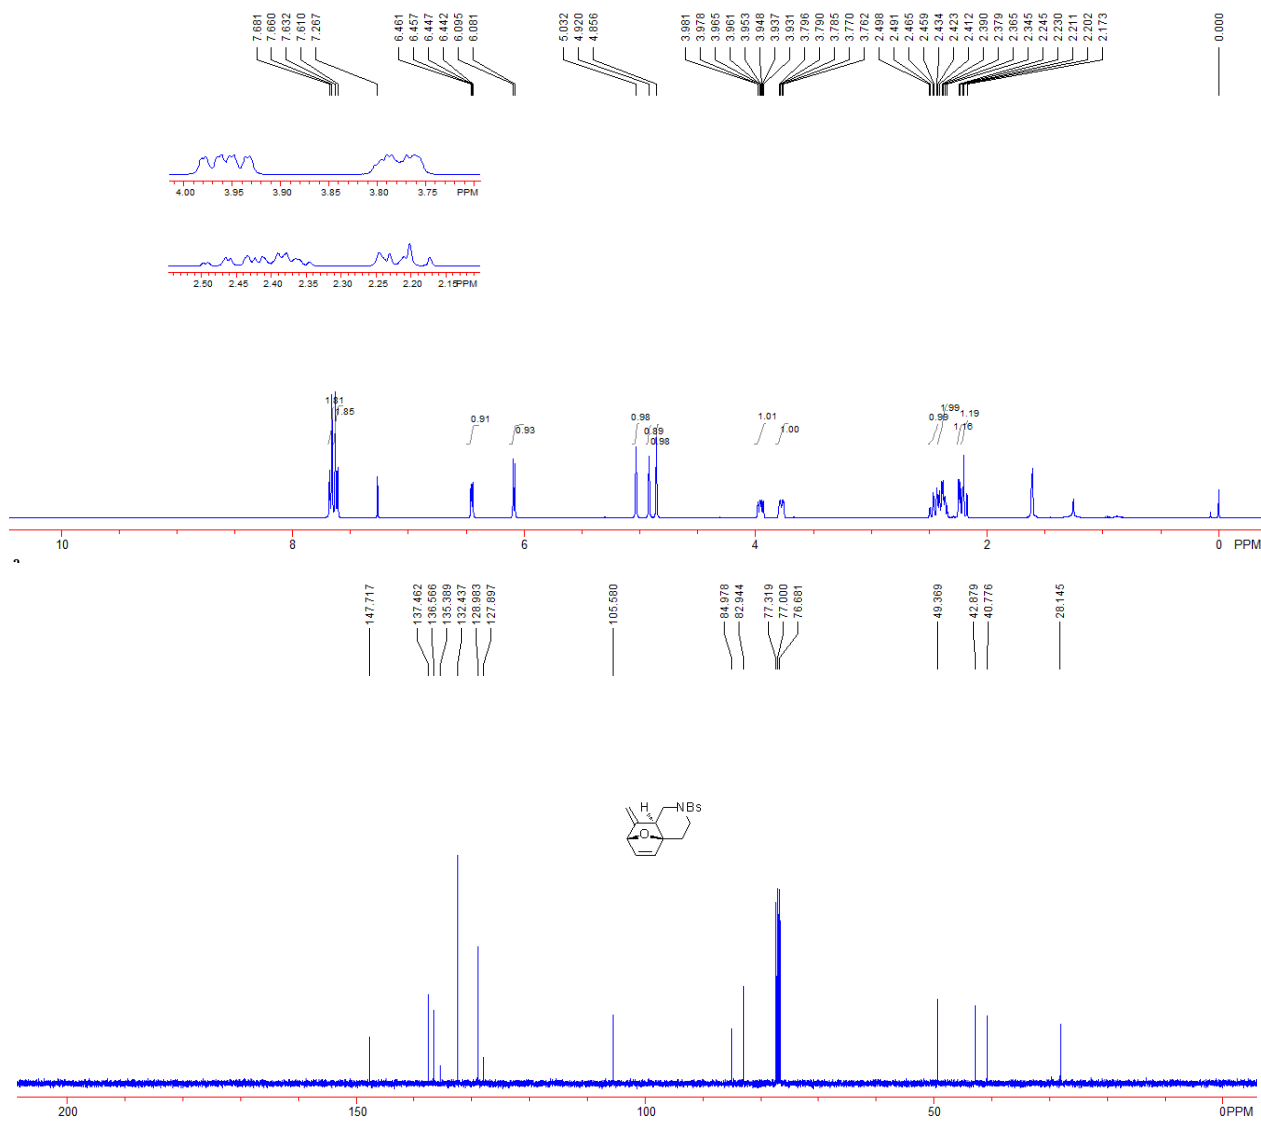

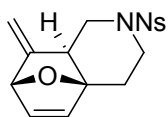

**(4a*S*,7*R*,8*aS*)-8-methylene-2-((4-nitrophenyl)sulfonyl)-2,3,4,7,8,8*a*-hexahydro-1*H*-4*a*,7-epoxyisoquinoline 5c**

A pale yellow solid, 56% yield (39 mg). M.p.: 175-178 °C. <sup>1</sup>H NMR (CDCl<sub>3</sub>, TMS, 400 MHz) δ 2.23-2.30 (m, 2H, CH<sub>2</sub>), 2.36-2.45 (m, 2H, CH<sub>2</sub>), 2.53 (td, *J* = 1.6, 12.4 Hz, 1H, CH<sub>2</sub>), 3.81-3.86 (m, 1H, CH<sub>2</sub>), 4.00 (ddd, *J* = 1.6, 6.4, 10.0 Hz, 1H, CH<sub>2</sub>), 4.87 (s, 1H, =CH<sub>2</sub>), 4.93 (s, 1H, =CH<sub>2</sub>), 5.05 (s, 1H, CH), 6.09 (d, *J* = 5.6 Hz, 1H, =CH), 6.46 (d, *J* = 5.6 Hz, 1H, =CH), 7.95 (d, *J* = 8.8 Hz, 2H, ArH), 8.38 (d, *J* = 8.8 Hz, 2H, ArH). <sup>13</sup>C NMR (CDCl<sub>3</sub>, 100 MHz, TMS) δ 28.2, 40.8, 42.9, 49.3, 83.0, 84.9, 105.7, 124.4, 128.6, 136.7, 137.3, 142.6, 147.6, 150.2. IR (CH<sub>2</sub>Cl<sub>2</sub>) ν 2926, 1674, 1575, 1471, 1347, 1166, 1069, 1010, 825, 742, 705 cm<sup>-1</sup>. MS (EI) *m/z* (%): 81 (100), 134 (70.86), 162 (52.45), 215 (26.71), 267 (40.59), 348 (4.7) [M<sup>+</sup>]; HRMS (EI) Calcd. for C<sub>16</sub>H<sub>16</sub>N<sub>2</sub>O<sub>5</sub>S<sup>+</sup>(M<sup>+</sup>) requires 348.0780, Found: 348.0778.

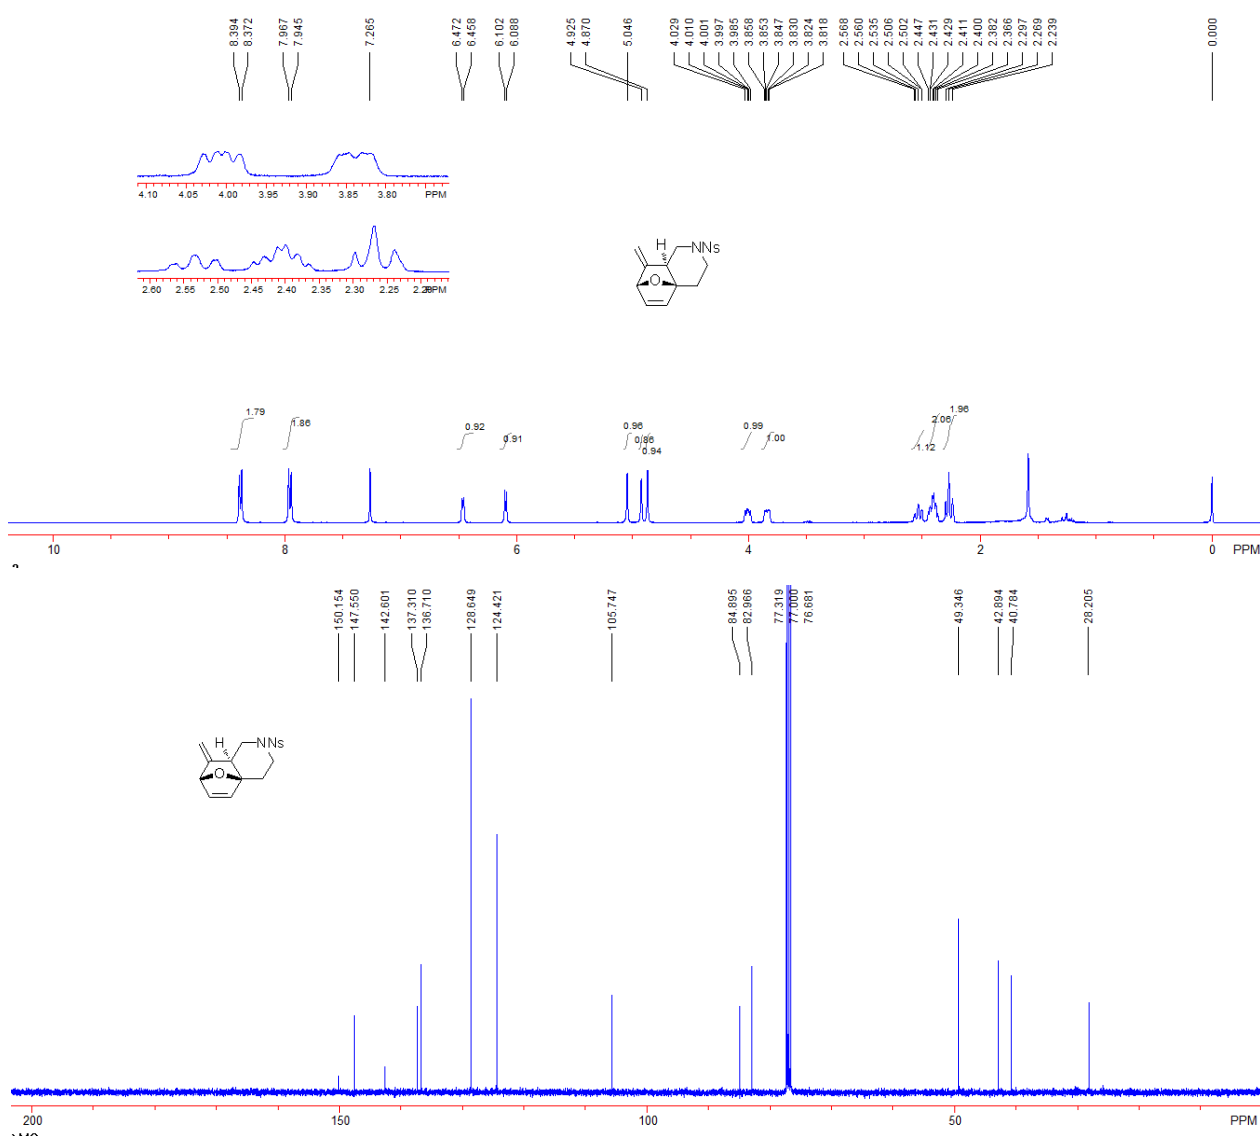



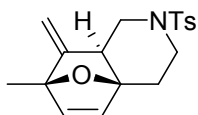

**(4aS,7R,8aS)-7-methyl-8-methylene-2-tosyl-2,3,4,7,8,8a-hexahydro-1H-4a,7-epoxyisoquinoline 5d**

A white solid, 83% yield (55 mg). M.p.: 145-148 °C. <sup>1</sup>H NMR (CDCl<sub>3</sub>, TMS, 400 MHz) δ 1.53 (s, 3H, CH<sub>3</sub>), 2.16 (dd, *J* = 11.2, 11.6 Hz, 1H, CH<sub>2</sub>), 2.18 (dt, *J* = 2.4, 14.0 Hz, 1H, CH<sub>2</sub>), 2.30 (td, *J* = 2.4, 14.0 Hz, 1H, CH<sub>2</sub>), 2.42 (s, 3H, CH<sub>3</sub>), 2.39-2.45 (m, 1H, CH<sub>2</sub>), 2.48 (ddd, *J* = 2.8, 6.4, 9.2 Hz, 1H, CH<sub>2</sub>), 3.76 (ddd, *J* = 2.0, 5.6, 8.0 Hz, 1H, CH<sub>2</sub>), 3.97 (ddd, *J* = 2.0, 8.0, 11.2 Hz, 1H, CH<sub>2</sub>), 4.85 (s, 1H, =CH<sub>2</sub>), 4.92 (s, 1H, =CH<sub>2</sub>), 6.06 (d, *J* = 5.6 Hz, 1H, =CH), 6.18 (d, *J* = 5.6 Hz, 1H, =CH), 7.31 (d, *J* = 8.0 Hz, 2H, ArH), 7.63 (d, *J* = 8.0 Hz, 2H, ArH). <sup>13</sup>C NMR (CDCl<sub>3</sub>, 100 MHz, TMS) δ 15.3, 21.5, 28.2, 42.8, 49.5, 83.4, 88.2, 104.0, 127.5, 129.7, 133.3, 138.3, 139.3, 143.5, 151.8. IR (CH<sub>2</sub>Cl<sub>2</sub>) ν 2930, 2857, 1667, 1463, 1341, 1165, 1120, 935, 709, 660 cm<sup>-1</sup>. MS (ESI) *m/z* (%): 332.1 (100) [M<sup>+</sup>+H]; HRMS (ESI) Calcd. for C<sub>18</sub>H<sub>22</sub>NO<sub>3</sub>S<sup>+</sup>(M<sup>+</sup>+H) requires 332.1315 Found: 332.1317.

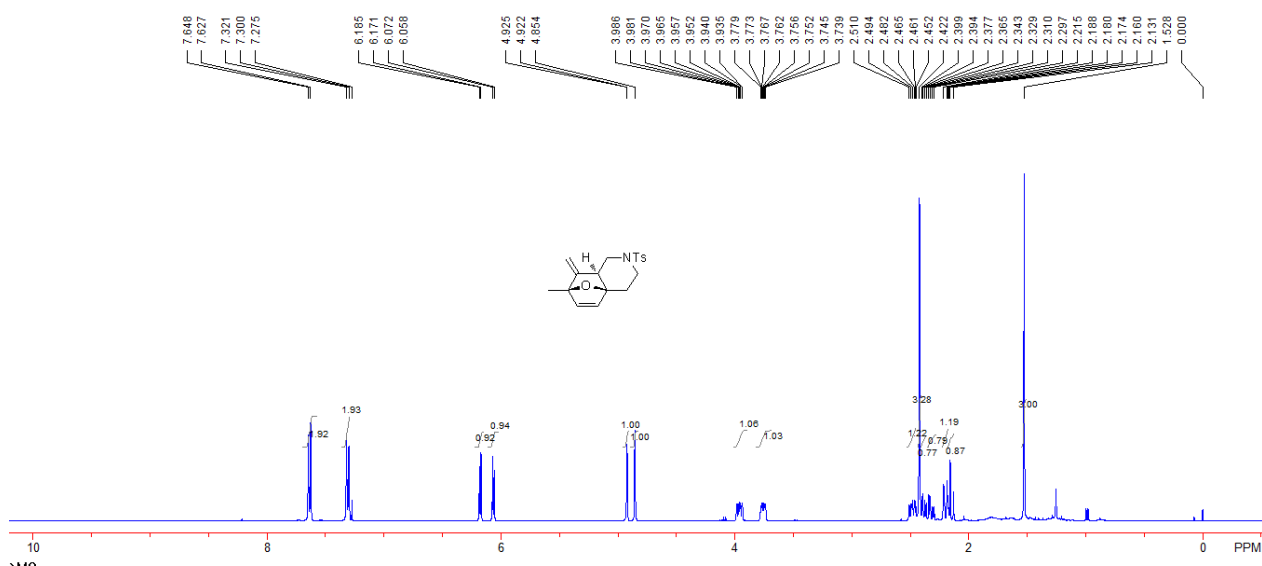

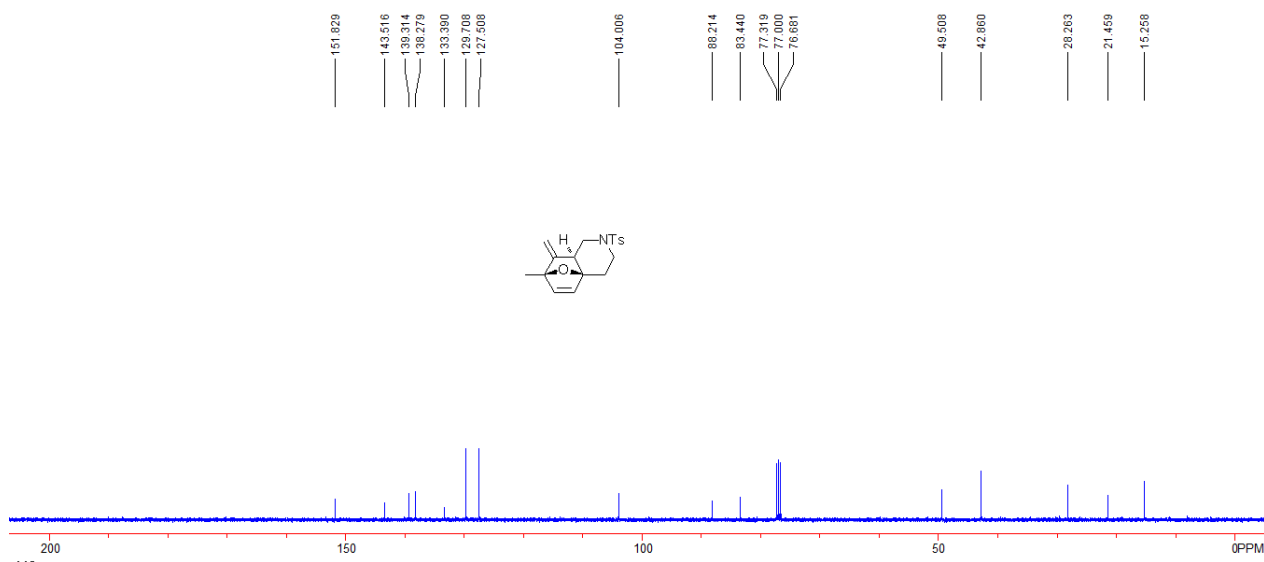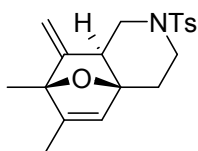

**(4a*S*,7*R*,8a*S*)-6,7-dimethyl-8-methylene-2-tosyl-2,3,4,7,8,8a-hexahydro-1*H*-4a,7-epoxyisoquinoline 5e**

A white solid, 87% yield (60 mg). M.p.: 112-115 °C. <sup>1</sup>H NMR (CDCl<sub>3</sub>, TMS, 400 MHz) δ 1.44 (s, 3H, CH<sub>3</sub>), 1.69 (s, 3H, CH<sub>3</sub>), 2.11-2.18 (m, 2H, CH<sub>2</sub>), 2.27 (td, *J* = 5.2, 13.2 Hz, 1H, CH<sub>2</sub>), 2.38-2.46 (m, 1H, CH<sub>2</sub>), 2.42 (s, 3H, CH<sub>3</sub>), 2.50 (ddd, *J* = 2.0, 6.8, 10.8 Hz, 1H, CH<sub>2</sub>), 3.71-3.77 (m, 1H, CH<sub>2</sub>), 3.92 (ddd, *J* = 1.6, 7.6, 10.8 Hz, 1H, CH<sub>2</sub>), 4.84 (s, 1H, =CH<sub>2</sub>), 4.88 (s, 1H, =CH<sub>2</sub>), 5.66 (s, 1H, =CH), 7.31 (d, *J* = 8.4 Hz, 2H, ArH), 7.63 (d, *J* = 8.4 Hz, 2H, ArH). <sup>13</sup>C NMR (CDCl<sub>3</sub>, 100 MHz, TMS) δ 10.9, 13.6, 21.5, 28.3, 42.8, 43.8, 49.7, 82.1, 89.5, 103.4, 127.5, 129.7, 132.3, 133.4, 143.5, 148.2, 152.1. IR (CH<sub>2</sub>Cl<sub>2</sub>) ν 2930, 2855, 1664, 1452, 1377, 1349, 1167, 1144, 1014, 919, 815, 744, 671 cm<sup>-1</sup>. MS (ESI) *m/z* (%): 346.1 (100) [M<sup>+</sup>+H]; HRMS (ESI) Calcd. for C<sub>19</sub>H<sub>24</sub>NO<sub>3</sub>S<sup>+</sup>(M<sup>+</sup>+H) requires 346.1471, Found: 346.1475.

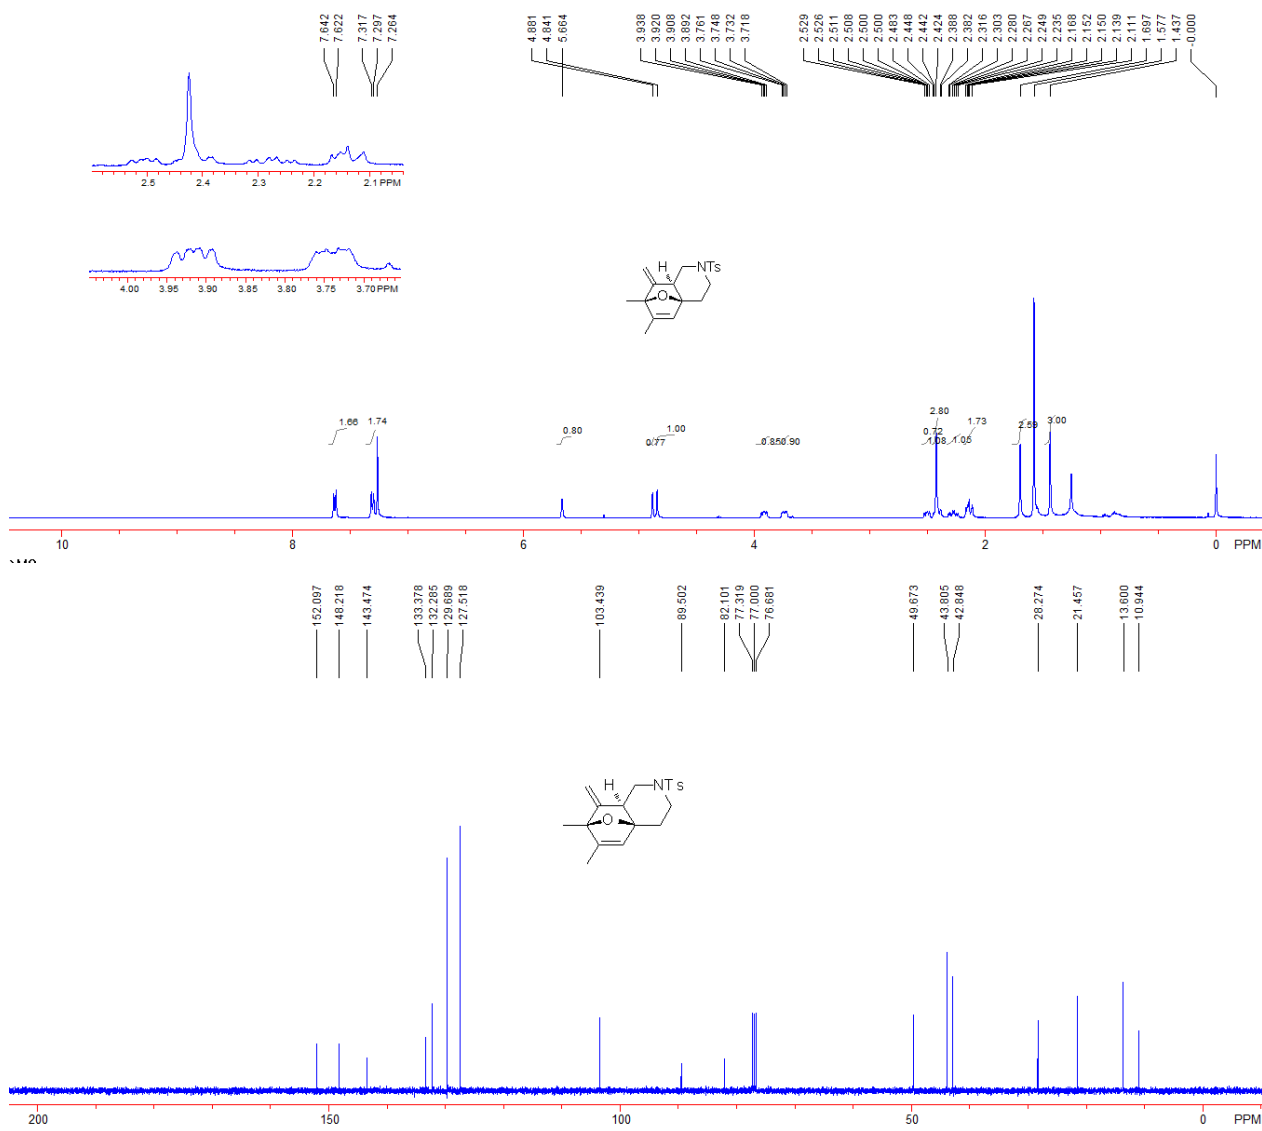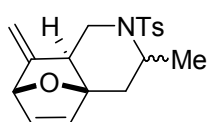

**(4a*S*,7*R*,8a*S*)-3-methyl-8-methylene-2-tosyl-2,3,4,7,8,8a-hexahydro-1*H*-4a,7-epoxyisoquinoline 5f**

A pale yellow solid, 61% yield (40 mg). M.p: 140-142 °C. <sup>1</sup>H NMR (CDCl<sub>3</sub>, TMS, 400 MHz) (showing as mixture of diastereomers in ~6:1 ratio) major diastereomer δ 1.07 (d, *J* = 7.2 Hz, 3H, CH<sub>3</sub>), 2.02 (d, *J* = 15.2 Hz, 1H, CH<sub>2</sub>), 2.25 (dd, *J* = 6.8 Hz, 11.6 Hz, 1H, CH), 2.37 (dd, *J* = 6.8 Hz, 15.2 Hz, 1H, CH<sub>2</sub>), 2.42 (s, 3H, CH<sub>3</sub>), 2.94 (dd, *J* = 11.6 Hz, 13.6 Hz, 1H, CH<sub>2</sub>), 3.99 (dd, *J* = 6.8 Hz, 13.6 Hz, 1H, CH<sub>2</sub>), 4.29 (qd, *J* = 7.2, 7.2 Hz, 1H, CH), 4.88 (s, 1H, =CH<sub>2</sub>), 4.96 (s, 1H, =CH<sub>2</sub>), 5.06 (d, *J* = 1.2 Hz, 1H, CH), 6.00 (d, *J* = 5.6 Hz, 1H, =CH), 6.39 (dd, *J* = 1.2 Hz, 5.6 Hz, 1H, =CH), 7.29 (d, *J* = 8.0 Hz, 2H, ArH), 7.71 (d, *J* = 8.0 Hz, 2H, ArH). <sup>1</sup>H NMR (CDCl<sub>3</sub>, TMS, 400 MHz). <sup>1</sup>H NMR (CDCl<sub>3</sub>, TMS, 400 MHz) minor diastereomer δ 1.37 (d, *J* = 7.2 Hz, 3H,

CH<sub>3</sub>), 2.02 (d, *J* = 15.2 Hz, 1H, CH<sub>2</sub>), 2.45 (dd, *J* = 6.0 Hz, 15.2 Hz, 1H, CH<sub>2</sub>), 2.70 (dd, *J* = 11.6, 13.4 Hz, 1H, CH<sub>2</sub>), 4.22 (dd, *J* = 6.0, 12.4 Hz, 1H, CH<sub>2</sub>), 4.92 (s, 2H, =CH<sub>2</sub>), 5.09 (d, *J* = 1.6 Hz, 1H, CH), 6.15 (d, *J* = 5.6 Hz, 1H, =CH), 6.42 (dd, *J* = 1.6, 5.6 Hz, 1H, =CH), 7.29 (d, *J* = 8.0 Hz, 2H, ArH), 7.71 (d, *J* = 8.0 Hz, 2H, ArH). <sup>13</sup>C NMR (CDCl<sub>3</sub>, 100 MHz, TMS) not recorded for mixture. IR (CH<sub>2</sub>Cl<sub>2</sub>) ν 2924, 1670, 1451, 1368, 1338, 1153, 1086, 960, 920, 762, 728, 657 cm<sup>-1</sup>. MS (ESI) *m/z* (%): 332.1 (100) [M<sup>+</sup>+H]; HRMS (ESI) Calcd. for C<sub>18</sub>H<sub>22</sub>NO<sub>3</sub>S<sup>+</sup>(M<sup>+</sup>+H) requires 332.1315, Found: 332.1314.

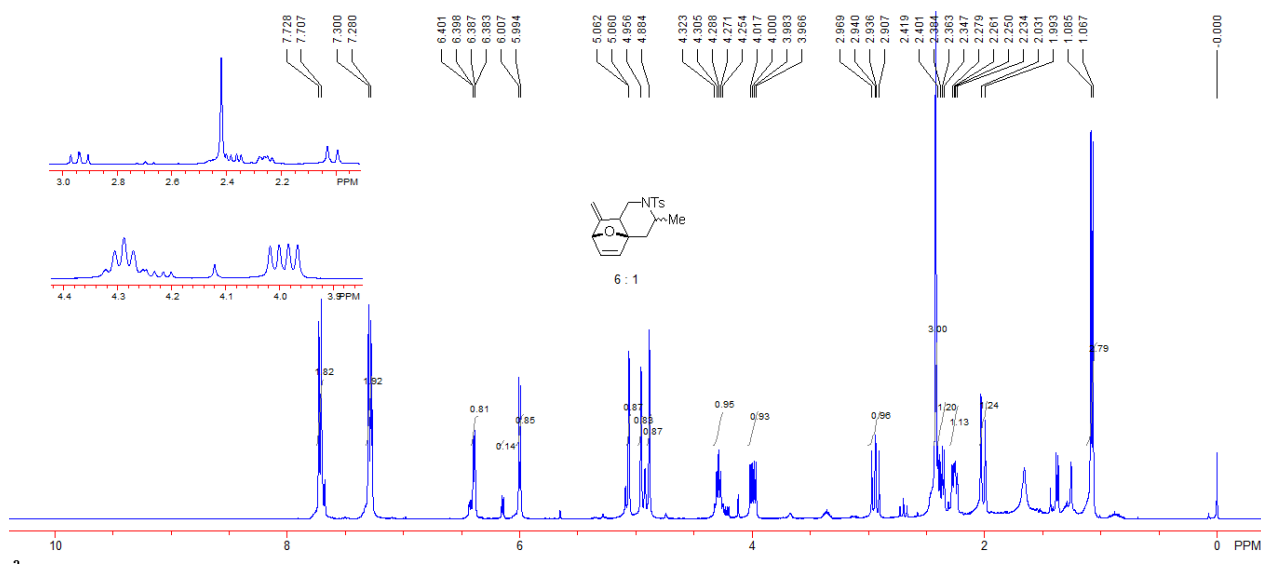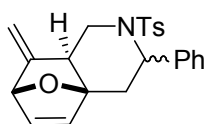

**(4a*S*,7*R*,8a*S*)-8-methylene-3-phenyl-2-tosyl-2,3,4,7,8,8a-hexahydro-1*H*-4a,7-epoxyisoquinoline 5g**

A pale yellow solid, 71% yield (56 mg). M.p.: 173-176 °C. <sup>1</sup>H NMR (CDCl<sub>3</sub>, TMS, 400 MHz) (showing as mixture of diastereomers in ~7:1 ratio) major diastereomer δ 2.22 (dd, *J* = 6.4, 11.2 Hz, 1H, CH<sub>2</sub>), 2.46 (s, 3H, CH<sub>3</sub>), 2.53 (dd, *J* = 7.2, 15.6 Hz, 1H, CH<sub>2</sub>), 2.81-2.91 (m, 2H, CH<sub>2</sub>), 3.94 (dd, *J* = 6.4, 14.4 Hz, 1H, CH<sub>2</sub>), 4.81 (s, 1H, CH), 4.85 (s, 1H, =CH<sub>2</sub>), 4.96 (s, 1H, =CH<sub>2</sub>), 5.35 (d, *J* = 7.2 Hz, 1H, CH), 6.00 (d, *J* = 5.6 Hz, 1H, =CH), 6.37 (d, *J* = 5.6 Hz, 1H, =CH), 7.19-7.30 (m, 3H, ArH), 7.32-7.39 (m, 4H, ArH), 7.80 (d, *J* = 8.0 Hz, 2H, ArH). <sup>13</sup>C NMR (CDCl<sub>3</sub>, 100 MHz, TMS) δ 21.5, 32.0, 40.0, 43.5, 53.5, 83.3, 85.3, 105.6, 127.06, 127.11, 127.17, 128.1, 129.8, 135.7, 138.1, 138.59, 138.63, 143.4, 147.1. Minor diastereomer: <sup>1</sup>H NMR (CDCl<sub>3</sub>, TMS, 400 MHz) select resonances: δ 2.09 (dd, *J* = 4.0, 16.0 Hz, 1H, CH<sub>2</sub>), 2.38 (s, 3H, CH<sub>3</sub>), 2.92-2.97 (m, 2H, CH<sub>2</sub>), 4.23 (dd, *J* = 5.2, 12.0 Hz, 1H, CH<sub>2</sub>), 4.85 (s, 1H, =CH<sub>2</sub>), 4.94 (s, 1H, =CH<sub>2</sub>), 5.10 (s, 1H, CH), 5.86 (d, *J* = 5.6 Hz, 1H, =CH), 6.29 (dd, *J* = 1.6, 5.6 Hz, 1H, =CH), 7.39 (d, *J* = 8.0

Hz, 2H, ArH), 7.49 (d,  $J = 8.0$  Hz, 2H, ArH). IR (CH<sub>2</sub>Cl<sub>2</sub>)  $\nu$  2927, 1671, 1598, 1448, 1368, 1340, 1158, 1116, 854, 768, 743, 707, 694, 663 cm<sup>-1</sup>. MS (ESI)  $m/z$  (%): 394.1 (100) [M<sup>+</sup>+H]; HRMS (ESI) Calcd. for C<sub>23</sub>H<sub>24</sub>NO<sub>3</sub>S<sup>+1</sup>(M<sup>+</sup>+H) requires 394.1471, Found: 394.1472.

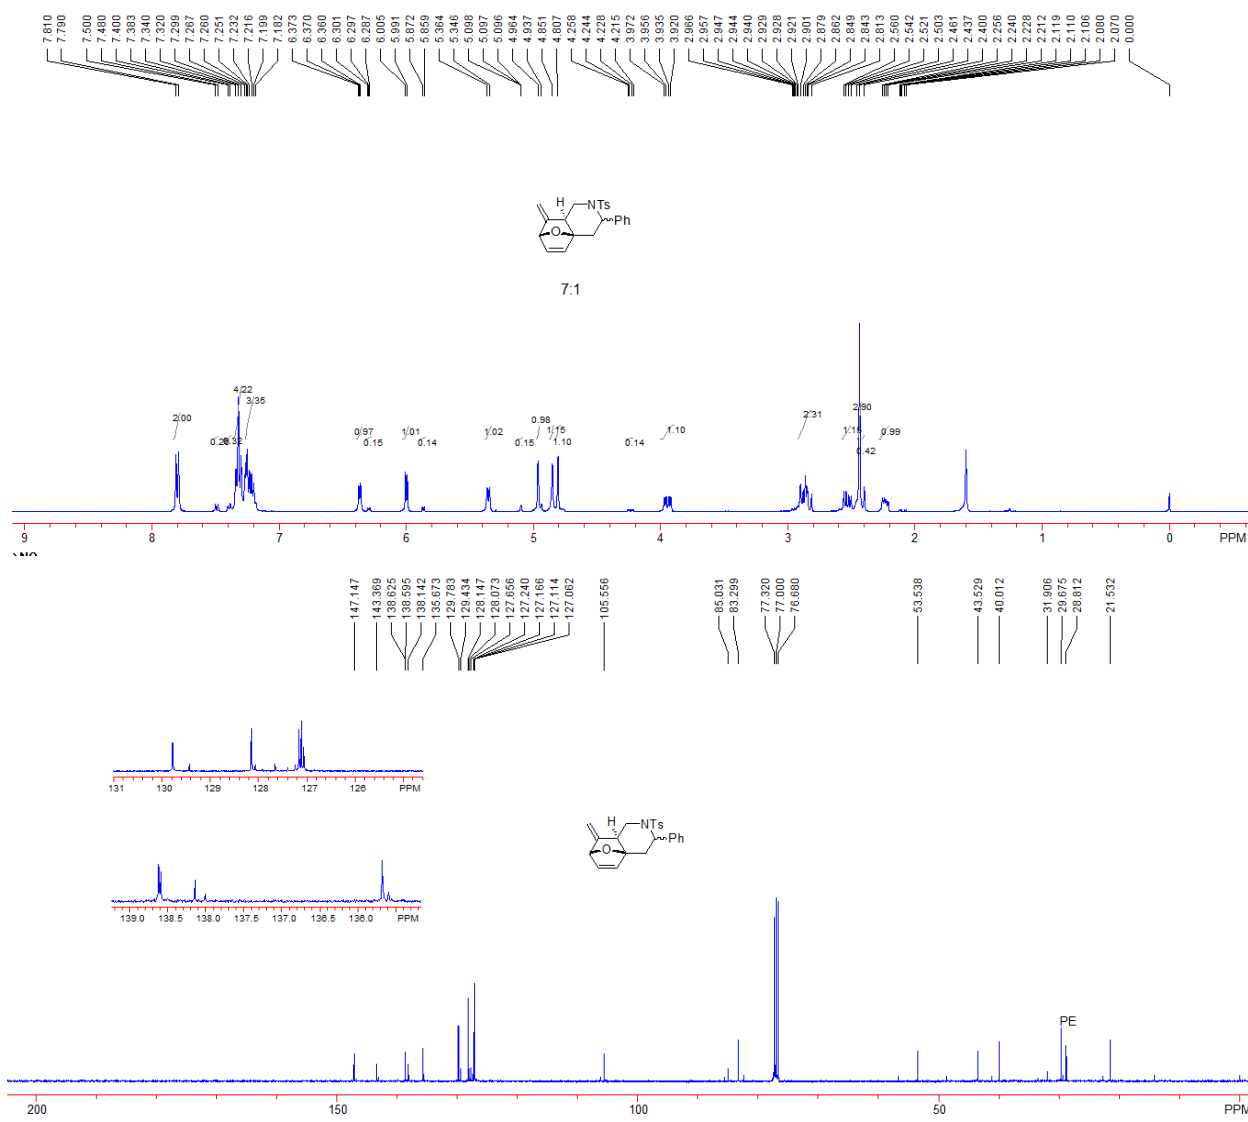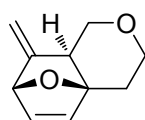

### (4a*S*,7*R*,8a*S*)-8-methylene-1,3,4,7,8,8a-hexahydro-4a,7-epoxyisochromene **5h**

A Yellow liquid, 9% yield (8 mg). <sup>1</sup>H NMR (CDCl<sub>3</sub>, TMS, 400 MHz)  $\delta$  2.08 (dd,  $J = 2.0, 14.4$  Hz, 1H, CH<sub>2</sub>), 2.26-2.37 (m, 2H, CH<sub>2</sub>), 3.32 (dd,  $J = 11.2, 11.2$  Hz, 1H, CH<sub>2</sub>), 3.60 (td, 1H,  $J = 2.0, 11.2$  Hz, 1H, CH<sub>2</sub>), 3.92 (dd,  $J = 1.6, 11.6$  Hz, 1H, CH<sub>2</sub>), 4.07 (dd,  $J = 6.8, 11.6$  Hz, 1H, CH<sub>2</sub>), 4.77 (s, 1H, =CH<sub>2</sub>), 5.00 (s, 1H, =CH<sub>2</sub>), 5.02 (d,  $J = 1.6$  Hz, 1H, CH), 6.12 (d,  $J = 5.6$  Hz, 1H, =CH), 6.45 (dd,  $J = 1.6, 5.6$  Hz, 1H, =CH). <sup>13</sup>C NMR (CDCl<sub>3</sub>, 100 MHz, TMS)  $\delta$  28.9, 40.9, 64.2, 70.6, 83.3, 84.9, 104.9, 136.0, 138.1, 147.4. IR (CH<sub>2</sub>Cl<sub>2</sub>)  $\nu$  2927, 2856, 1710, 1668, 1449,

1376, 1263, 1084, 1011, 971, 943, 927, 889, 817, 769, 702, 678  $\text{cm}^{-1}$ . MS (EI)  $m/z$  (%): 81 (100), 91 (66), 92 (58), 105 (43), 134 (41), 149 (27), 164 (9)  $[\text{M}^+]$ ; HRMS (EI) Calcd. for  $\text{C}_{10}\text{H}_{12}\text{O}_2^{+1}(\text{M}+\text{H})^+$  requires 164.0837, Found: 164.0838.

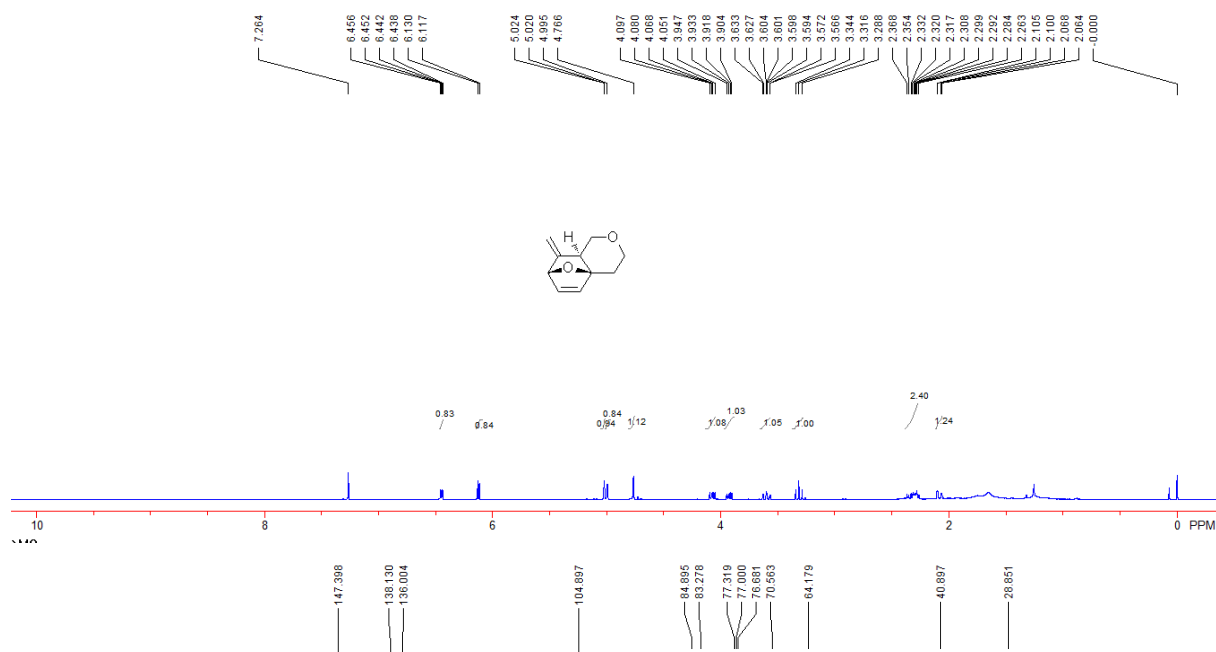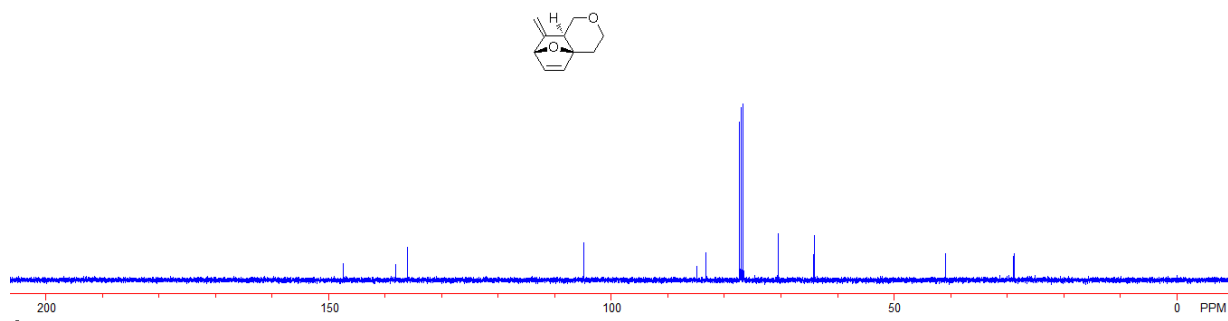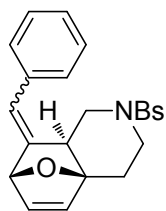

**(4a*S*,7*R*,8a*S*)-8-benzylidene-2-((4-bromophenyl)sulfonyl)-2,3,4,7,8,8a-hexahydro-1*H*-4a,7-epoxyisoquinoline 7a**

A white solid, 55% yield (50 mg). M.p.: 122-125 °C.  $^1\text{H}$  NMR ( $\text{CDCl}_3$ , TMS, 400 MHz)  $\delta$  2.15 (dd,  $J = 11.6, 12.0$  Hz, 1H,  $\text{CH}_2$ ), 2.44 (dt,  $J = 5.6, 12.8$  Hz, 1H,  $\text{CH}_2$ ), 2.56 (td,  $J = 2.8, 12.8$  Hz, 1H,  $\text{CH}_2$ ), 2.56 (td,  $J = 2.8, 12.8$  Hz, 1H,  $\text{CH}_2$ ), 2.94 (ddd,  $J = 1.6, 6.4, 10.0$  Hz, 1H,  $\text{CH}_2$ ), 3.79-3.84 (m, 1H,  $\text{CH}_2$ ), 3.97 (ddd,  $J = 2.0, 6.8, 11.2$  Hz, 1H,  $\text{CH}_2$ ), 5.03 (d,  $J = 1.6$  Hz, 1H, CH), 6.14

(d,  $J = 5.6$  Hz, 1H, =CH), 6.42 (s, 1H, =CH), 6.51 (dd,  $J = 1.6, 5.6$  Hz, 1H, =CH), 7.27-7.40 (m, 5H, ArH), 7.49 (d,  $J = 8.8$  Hz, 2H, ArH), 7.59 (d,  $J = 8.8$  Hz, 2H, ArH).  $^{13}\text{C}$  NMR ( $\text{CDCl}_3$ , 100 MHz, TMS)  $\delta$  29.7, 40.6, 42.7, 46.9, 84.5, 85.6, 122.4, 127.5, 127.7, 127.8, 128.8, 128.9, 132.3, 136.0, 136.2, 136.7, 137.3, 139.7. IR ( $\text{CH}_2\text{Cl}_2$ )  $\nu$  2923, 2853, 1574, 1352, 1166, 1068, 771, 750, 718, 696  $\text{cm}^{-1}$ . MS (ESI)  $m/z$  (%): 458.0 (100) [ $\text{M}^+\text{H}$ ]; HRMS (ESI) Calcd. for  $\text{C}_{22}\text{H}_{21}\text{NO}_3\text{BrS}^+\text{(M}^+\text{H)}$  requires 458.0420, Found: 458.0413. (note: by-product: 10%.  $^1\text{H}$  NMR ( $\text{CDCl}_3$ , TMS, 400 MHz)  $\delta$  2.80, 3.25, 4.63, 6.02, 6.28, 7.64, 7.69 ppm).

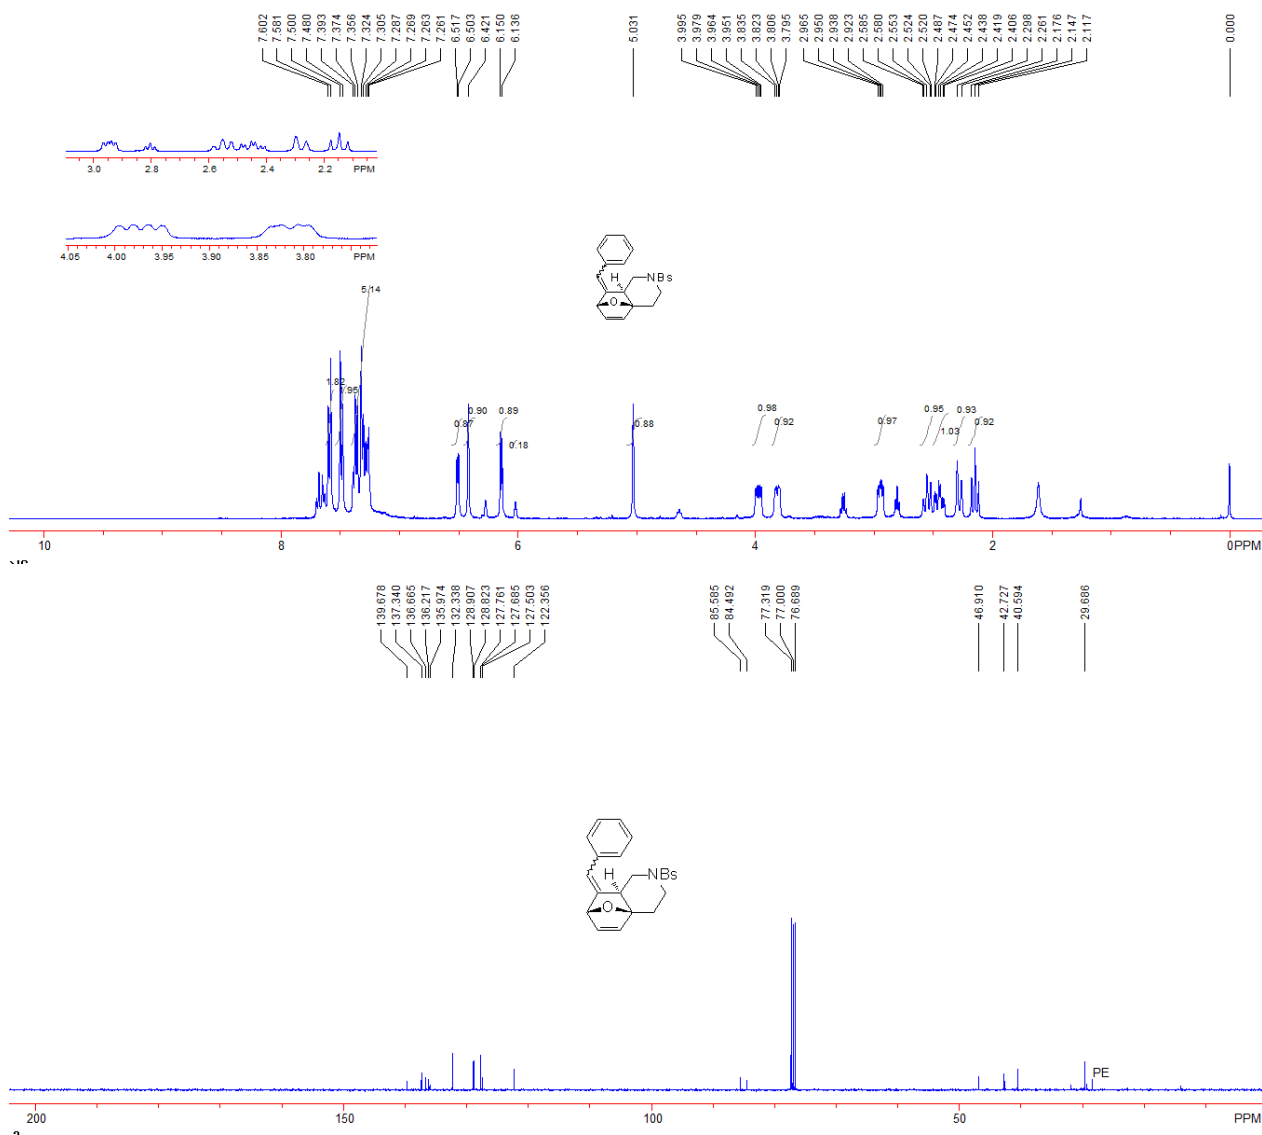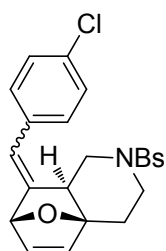

**(4a*S*,7*R*,8*aS*)-2-((4-bromophenyl)sulfonyl)-8-(4-chlorobenzylidene)-2,3,4,7,8,8*a*-hexahydro-1*H*-4*a*,7-epoxyisoquinoline **7b****

A white solid, 47% yield (46 mg). M.p.: 216-218 °C. <sup>1</sup>H NMR (CDCl<sub>3</sub>, TMS, 400 MHz) δ 2.16 (dd, *J* = 11.6, 12.4 Hz, 1H, CH<sub>2</sub>), 2.28 (dt, *J* = 2.4, 14.8 Hz, 1H, CH<sub>2</sub>), 2.45 (td, *J* = 5.6, 12.8 Hz, 1H, CH<sub>2</sub>), 2.57 (td, *J* = 2.8, 12.0 Hz, 1H, CH<sub>2</sub>), 2.91 (ddd, *J* = 1.6, 6.8, 10.4 Hz, 1H, CH<sub>2</sub>), 3.79-3.85 (m, 1H, CH<sub>2</sub>), 3.93 (ddd, *J* = 1.6, 6.8, 11.2 Hz, 1H, CH<sub>2</sub>), 5.02 (d, *J* = 1.2 Hz, 1H, CH), 6.15 (d, *J* = 6.0 Hz, 1H, =CH), 6.37 (s, 1H, =CH), 6.50 (dd, *J* = 1.6, 6.0 Hz, 1H, =CH), 7.24 (d, *J* = 8.8 Hz, 2H, ArH), 7.33 (d, *J* = 8.8 Hz, 2H, ArH), 7.51 (d, *J* = 8.8 Hz, 2H, ArH), 7.61 (d, *J* = 8.8 Hz, 2H, ArH). <sup>13</sup>C NMR (CDCl<sub>3</sub>, 100 MHz, TMS) δ 28.3, 40.6, 42.7, 46.7, 84.4, 85.6, 121.1, 127.8, 128.88, 128.90, 129.0, 132.4, 133.1, 134.7, 136.0, 136.6, 137.5, 140.4. IR (CH<sub>2</sub>Cl<sub>2</sub>) ν 3088, 2923, 2853, 1574, 1491, 1349, 1166, 1053, 1037, 884, 771, 754, 723, 704 cm<sup>-1</sup>. MS (MALDI) *m/z* (%): 492.0 (100) [M<sup>+</sup>+H]; HRMS (MALDI) Calcd. for C<sub>22</sub>H<sub>20</sub>O<sub>3</sub>NBrClS<sup>+</sup>(M<sup>+</sup>+H) requires 492.0030, Found: 492.0028.

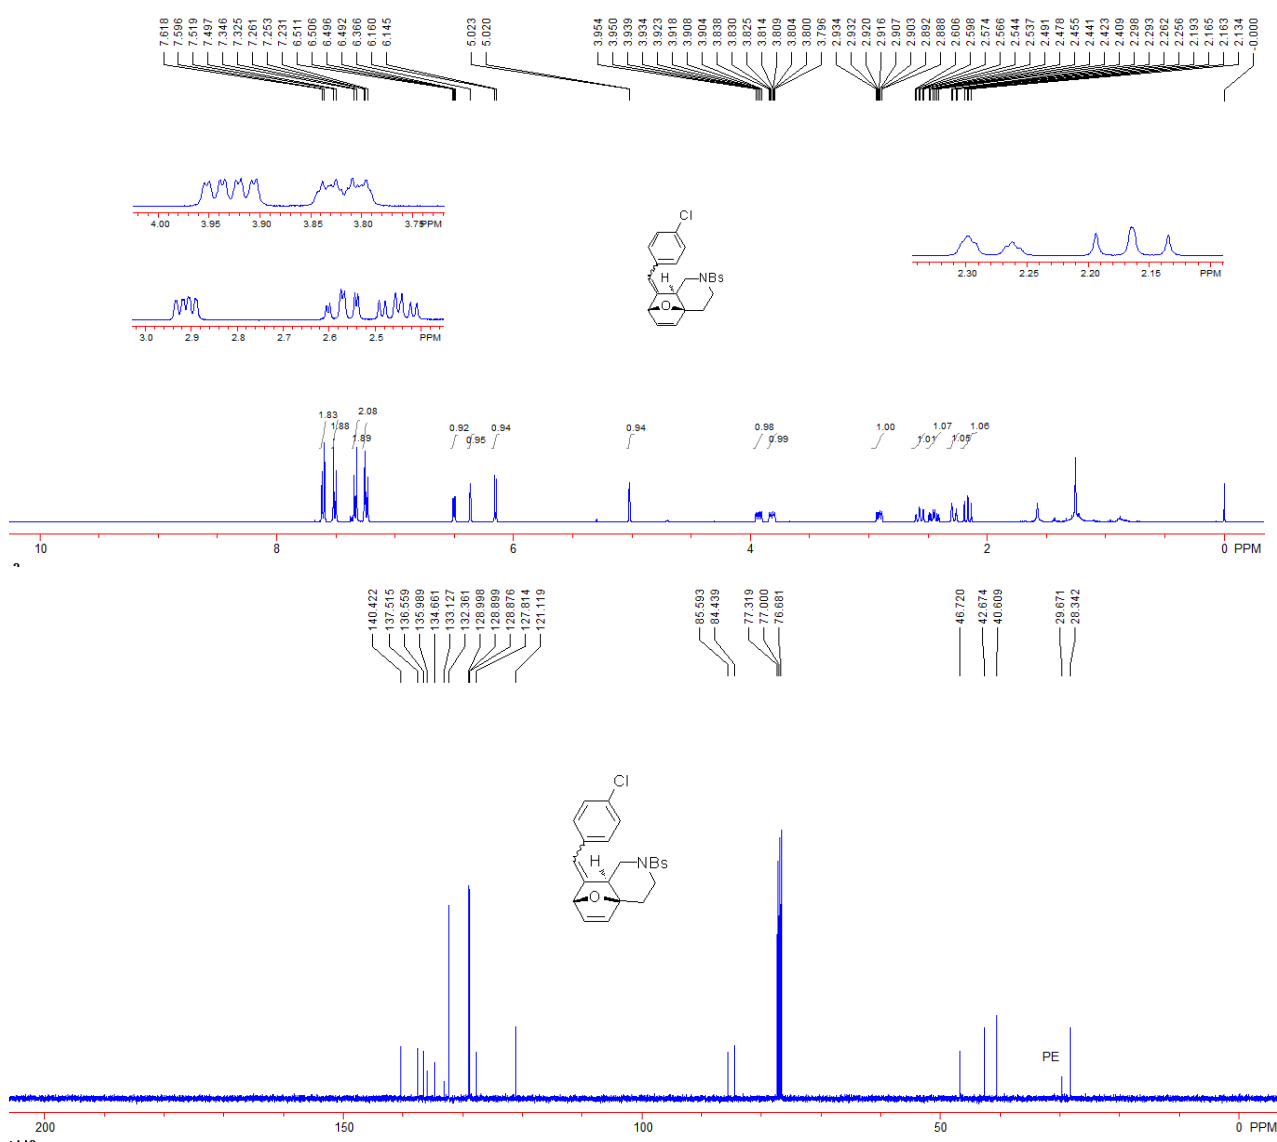



NOE of **7b** (600 MHz, CDCl<sub>3</sub>)

major

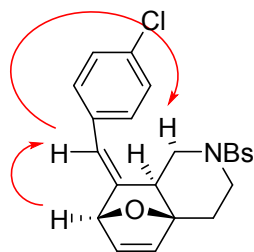

minor

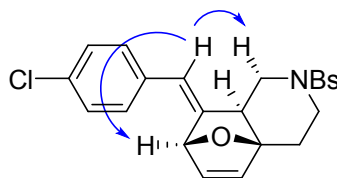

```

ZY-3-37-NOESY
Sample Name:
ZY-3-37-NOESY
Data Collected on:
OMC-NMR600-vnmrs600
Archive directory:
/home/omc/vnmrsys/data
Sample directory:
ZY-3-37-NOESY_20141105_01
FidFile: NOESY

Pulse Sequence: NOESY
Solvent: CDCl3
Data collected on: Nov 5 2014

Temp. 23.0 C / 296.1 K
Operator: omc

Relax. delay 1.000 sec
Acq. time 0.261 sec
Width 5896.2 Hz
2D Width 5896.2 Hz
4 repetitions
2 x 128 increments
OBSERVE H1, 599.7754542 MHz
DATA PROCESSING
Line broadening 3.0 Hz
Gauss apodization 0.065 sec
F1 DATA PROCESSING
Gauss apodization 0.012 sec
FT size 4096 x 2048
Total time 33 min
  
```

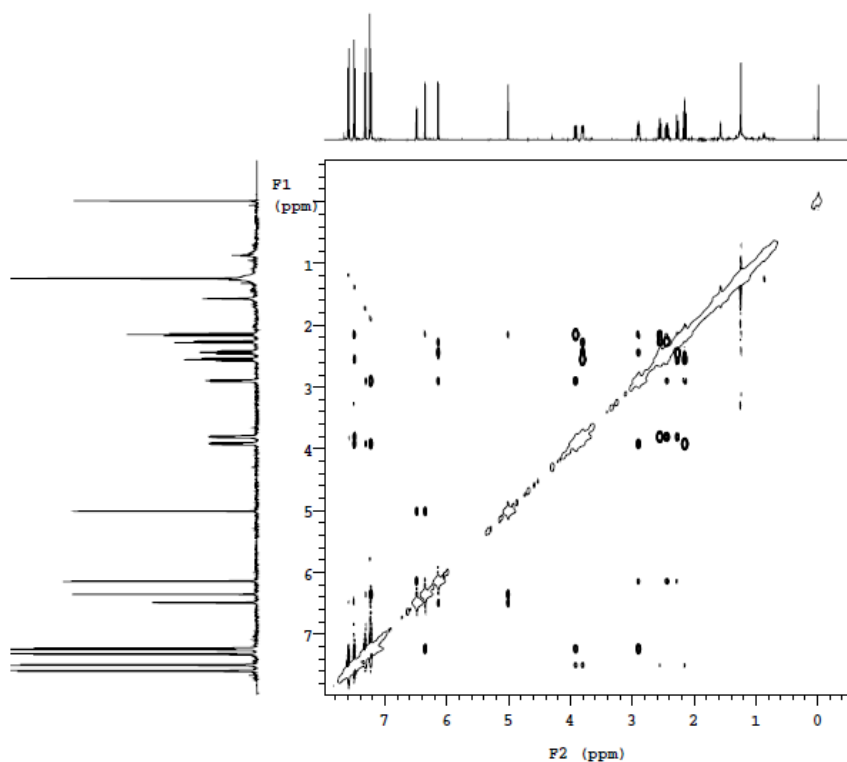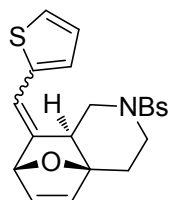

**(4a*S*,7*R*,8a*S*)-2-((4-bromophenyl)sulfonyl)-8-(thiophen-2-ylmethylene)-2,3,4,7,8,8a-hexahydro-1*H*-4a,7-epoxyisoquinoline **7c****

A white solid, 32% yield (30 mg). M.p.: 217-219 °C. <sup>1</sup>H NMR (CDCl<sub>3</sub>, TMS, 400 MHz) δ 2.24 (dd, *J* = 11.6, 12.0 Hz, 1H, CH<sub>2</sub>), 2.28 (dt, *J* = 2.0, 14.8 Hz, 1H, CH<sub>2</sub>), 2.44 (td, *J* = 5.6, 13.2 Hz,

1H, CH<sub>2</sub>), 2.58 (td, *J* = 2.8, 12.0 Hz, 1H, CH<sub>2</sub>), 3.80 (ddd, *J* = 1.2, 6.8, 10.8 Hz, 1H, CH<sub>2</sub>), 3.82-3.87 (m, 1H, CH<sub>2</sub>), 4.43 (ddd, *J* = 2.0, 6.8, 10.8 Hz, 1H, CH<sub>2</sub>), 5.01 (d, *J* = 1.2 Hz, 1H, CH), 6.10 (d, *J* = 5.2 Hz, 1H, =CH), 6.48 (dd, *J* = 2.0, 5.6 Hz, 1H, =CH), 6.59 (s, 1H, =CH), 6.96 (d, *J* = 3.2 Hz, 1H, ArH), 7.01 (dd, *J* = 1.2, 3.6 Hz, 1H, ArH), 7.28 (d, *J* = 5.2 Hz, 1H, ArH), 7.59 (d, *J* = 8.8 Hz, 2H, ArH), 7.63 (d, *J* = 8.8 Hz, 2H, ArH). <sup>13</sup>C NMR (CDCl<sub>3</sub>, 100 MHz, TMS) δ 28.3, 41.2, 42.7, 46.9, 83.7, 85.8, 115.4, 125.5, 127.25, 127.30, 127.8, 129.0, 132.4, 136.0, 136.8, 136.9, 138.2, 140.0. IR (CH<sub>2</sub>Cl<sub>2</sub>) ν 2925, 2856, 1574, 1643, 1353, 1167, 1008, 941, 776, 852, 719, 703 cm<sup>-1</sup>. MS (MALDI) *m/z* (%): 485.9 (100) [M+Na]<sup>+</sup>; HRMS (MALDI) Calcd. for C<sub>20</sub>H<sub>18</sub>NO<sub>3</sub>BrNaS<sub>2</sub><sup>+</sup>[M+Na]<sup>+</sup> requires 485.9804, Found: 485.9806.

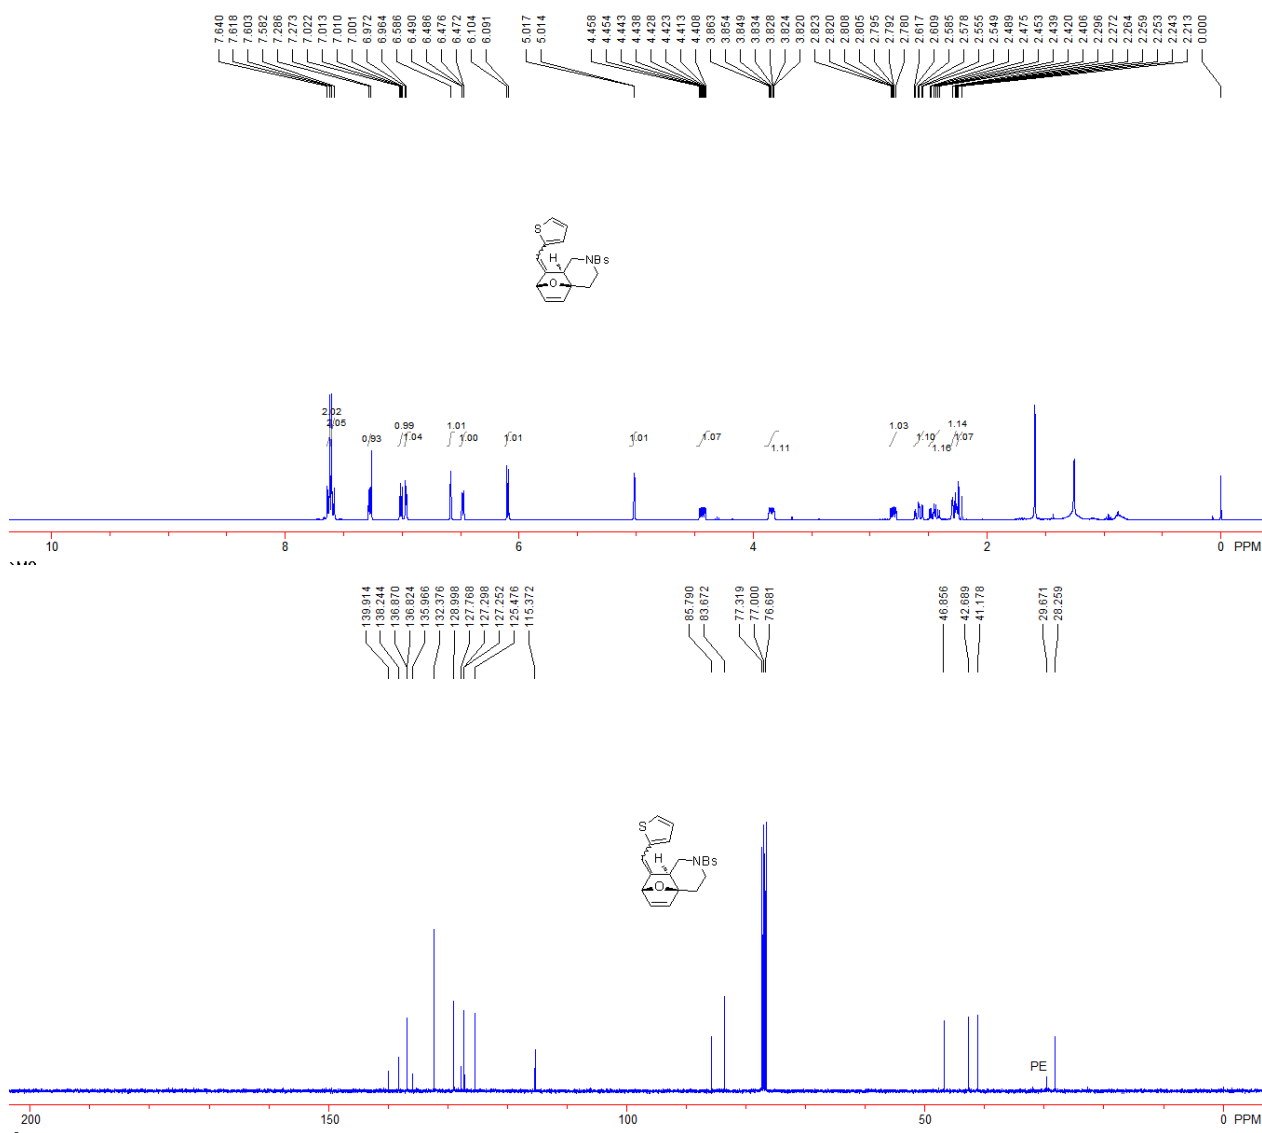

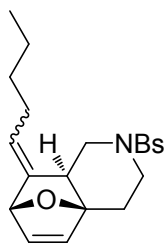

**(4a*S*,7*R*,8a*S*)-2-((4-bromophenyl)sulfonyl)-8-pentylidene-2,3,4,7,8,8a-hexahydro-1*H*-4a,7-epoxyisoquinoline 7d**

A white solid, 37% yield (32 mg). M.p.: 129-131 °C. <sup>1</sup>H NMR (CDCl<sub>3</sub>, TMS, 400 MHz) δ 0.89-0.94 (m, 3H, CH<sub>3</sub>), 1.28-1.34 (m, 4H, CH<sub>2</sub>), 1.92-2.05 (m, 2H, CH<sub>2</sub>), 2.15-2.24 (m, 2H, CH<sub>2</sub>), 2.34-2.52 (m, 3H, CH<sub>2</sub>), 3.75-3.79 (m, 1H, CH<sub>2</sub>), 4.03 (ddd, *J* = 2.0, 6.8, 10.4 Hz, 1H, CH<sub>2</sub>), 4.83 (d, *J* = 1.2 Hz, 1H, CH), 5.37 (t, *J* = 7.2 Hz, 1H, =CH), 6.01 (d, *J* = 5.6 Hz, 1H, =CH), 6.44 (dd, *J* = 1.6, 5.6 Hz, 1H, =CH), 7.61 (d, *J* = 8.8 Hz, 2H, ArH), 7.66 (d, *J* = 8.8 Hz, 2H, ArH). <sup>13</sup>C NMR (CDCl<sub>3</sub>, 100 MHz, TMS) δ 14.0, 22.2, 28.3, 29.7, 31.9, 39.4, 42.8, 48.5, 82.9, 85.1, 122.5, 127.9, 129.0, 132.4, 135.4, 136.1, 137.3, 138.4. IR (CH<sub>2</sub>Cl<sub>2</sub>) ν 2926, 2857, 1575.1352, 1166, 1088, 913, 750, 703 cm<sup>-1</sup>. MS (MALDI) *m/z* (%): 438.0 (100) [M+H]<sup>+</sup>; HRMS (MALDI) Calcd. for C<sub>20</sub>H<sub>25</sub>O<sub>3</sub>NBrS<sup>+</sup>(M+H)<sup>+</sup> requires 438.0733, Found: 438.0739.

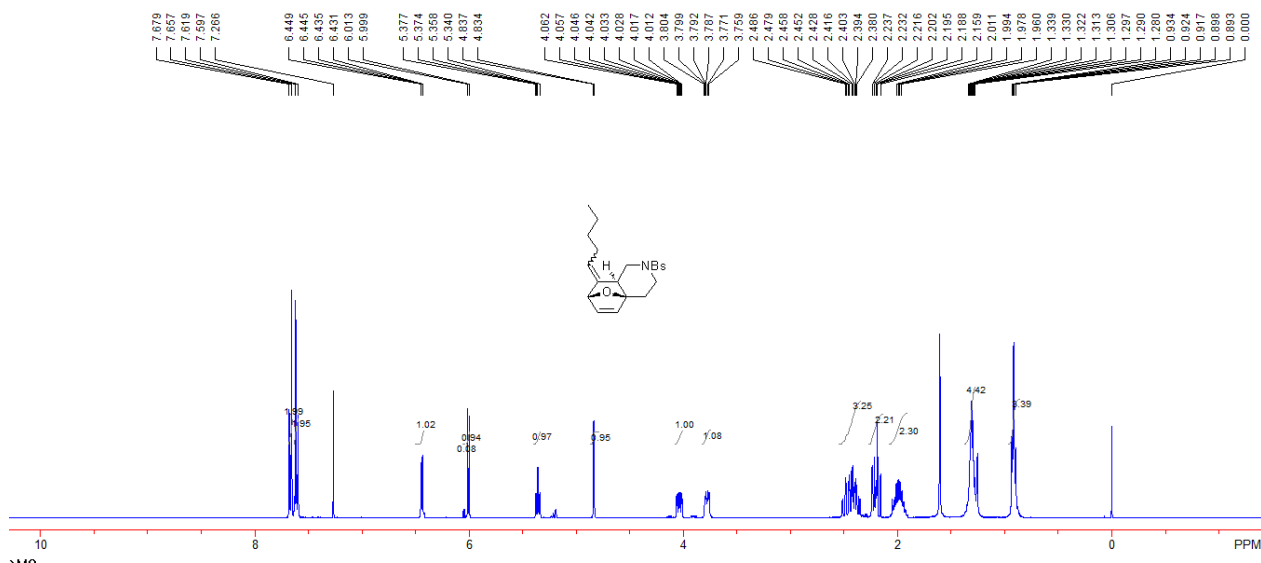

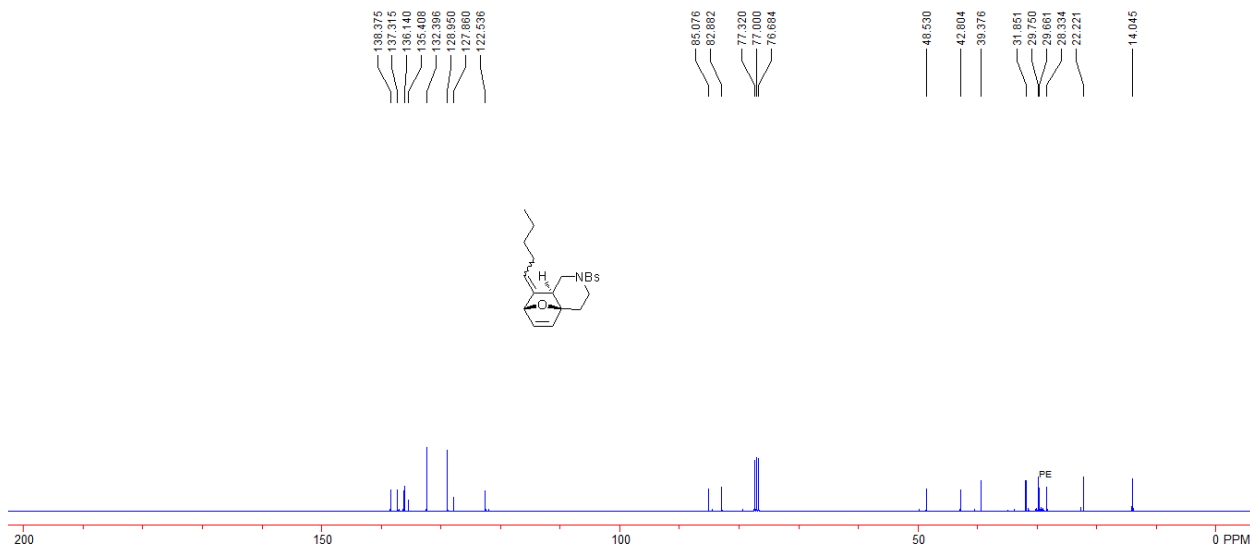

NOE of **7d** (600 MHz,  $\text{CDCl}_3$ )

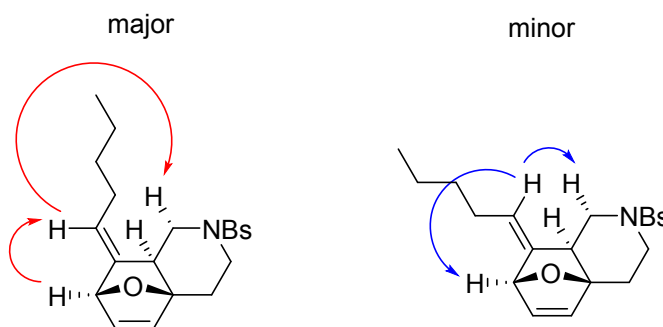

```

ZY-3-53-2a-noesy

Sample Name:
ZY-3-53-2a-noesy
Data Collected on:
OMC-NMR600-vnmrs600
Archive directory:
/home/omc/vnmrsys/data
Sample directory:
ZY-3-53-2a-noesy_20140826_01
FidFile: NOESY_01

Pulse Sequence: NOESY
Solvent: cdcl3
Data collected on: Aug 26 2014

Temp. 23.0 C / 296.1 K
Operator: omc

Relax. delay 1.500 sec
Acq. time 0.260 sec
Width 5924.2 Hz
2D Width 5924.2 Hz
8 repetitions
2 x 128 increments
OBSERVE H1, 599.7754542 MHz
DATA PROCESSING
Gauss apodization 0.074 sec
F1 DATA PROCESSING
Gauss apodization 0.012 sec
FT size 4096 x 2048
Total time 1 hr, 24 min
  
```

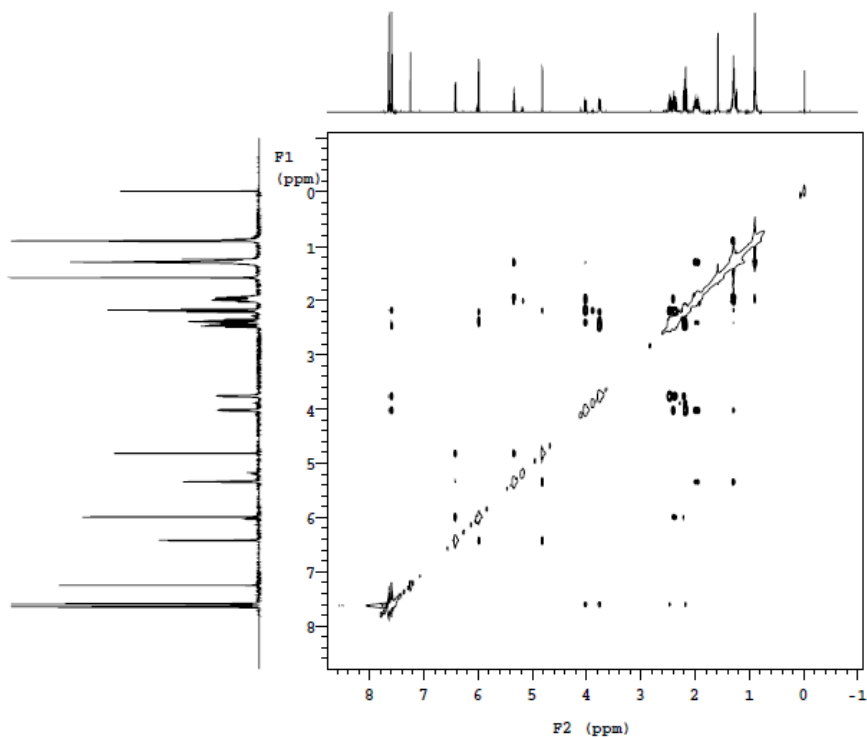

Plotname: --Not assigned--

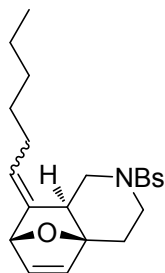

**(4a*S*,7*R*,8a*S*)-2-((4-bromophenyl)sulfonyl)-8-hexylidene-2,3,4,7,8,8a-hexahydro-1*H*-4a,7-epoxyisoquinoline 7e**

A white solid, 43% yield (39 mg). M.p.: 139-141 °C. <sup>1</sup>H NMR (CDCl<sub>3</sub>, TMS, 400 MHz) δ 0.91 (t, *J* = 6.4 Hz, 3H, CH<sub>3</sub>), 1.25-1.38 (m, 6H, CH<sub>2</sub>), 1.91-2.03 (m, 2H, CH<sub>2</sub>), 2.16-2.24 (m, 2H, CH<sub>2</sub>), 2.34-2.52 (m, 3H, CH<sub>2</sub>), 3.75-3.80 (m, 1H, CH<sub>2</sub>), 4.03 (ddd, *J* = 2.0, 6.4, 10.4 Hz, 1H, CH<sub>2</sub>), 4.83 (s, 1H, CH), 5.36 (td, *J* = 0.8, 7.2 Hz, 1H, =CH), 6.00 (d, *J* = 5.6 Hz, 1H, =CH), 6.44 (dd, *J* = 2.0, 5.6 Hz, 1H, =CH), 7.60 (d, *J* = 8.8 Hz, 2H, ArH), 7.66 (d, *J* = 8.8 Hz, 2H, ArH). <sup>13</sup>C NMR (CDCl<sub>3</sub>, 100 MHz, TMS) δ 14.0, 22.5, 28.3, 29.3, 30.0, 31.3, 39.3, 42.8, 48.5, 82.8, 85.0, 122.5, 127.8, 128.9, 132.3, 135.4, 136.1, 137.3, 138.3. IR (CH<sub>2</sub>Cl<sub>2</sub>) ν 2960, 2925, 2856, 1575, 1352, 1166, 1008, 914, 751, 705 cm<sup>-1</sup>. MS (MALDI) *m/z* (%): 474.0 (100) [M+Na]<sup>+</sup>; HRMS (MALDI) Calcd. for C<sub>21</sub>H<sub>26</sub>NO<sub>3</sub>BrNaS<sup>+</sup>[M+Na]<sup>+</sup> requires 474.0709, Found: 474.0709.

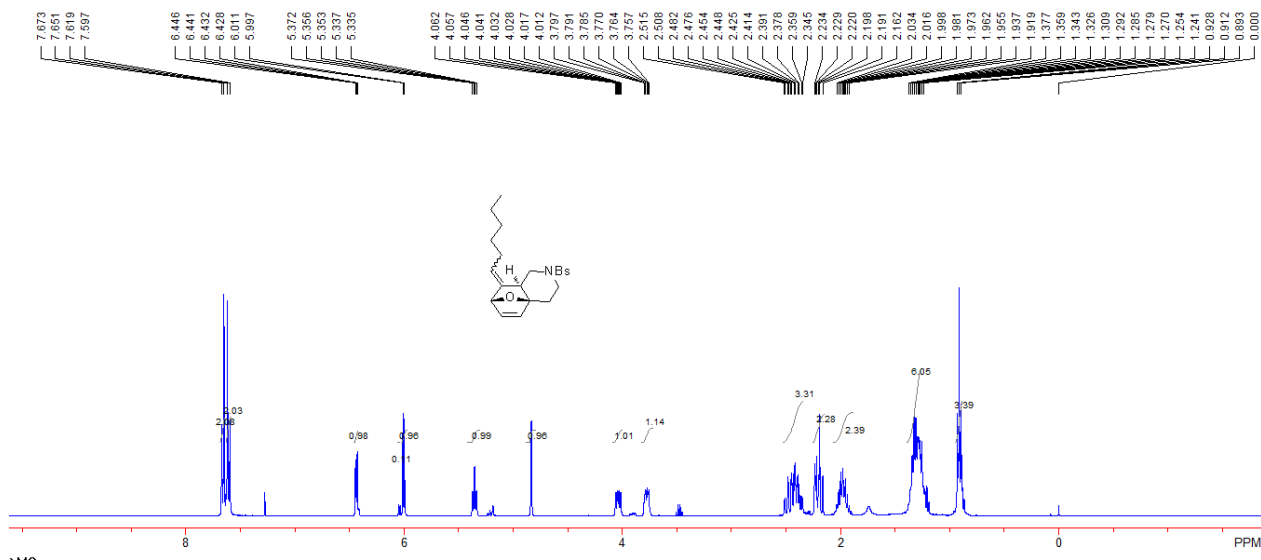

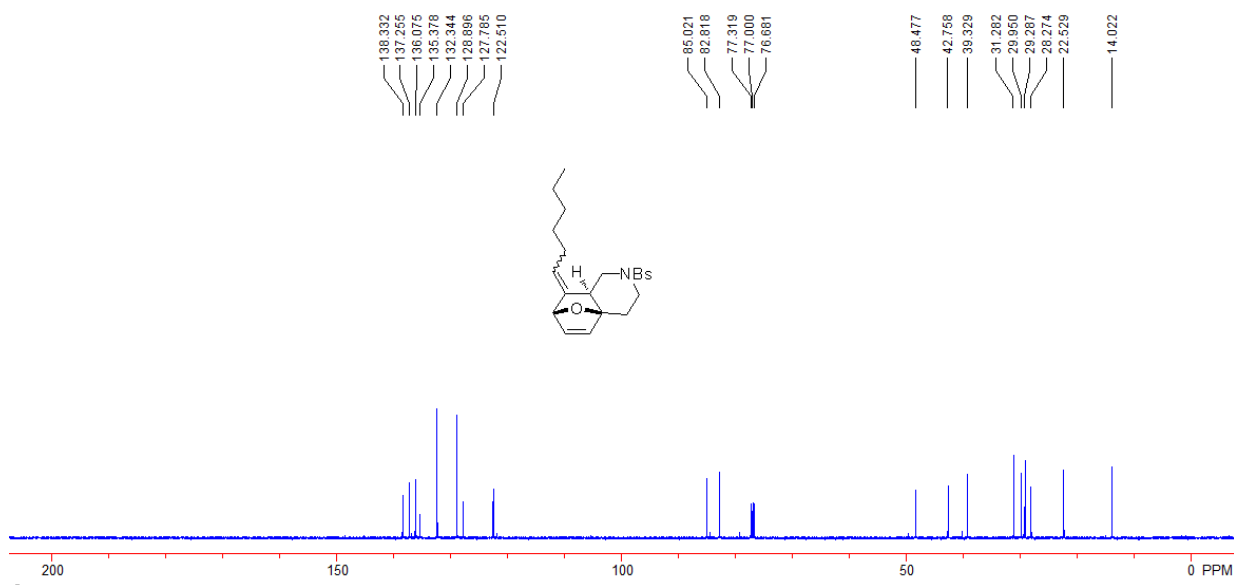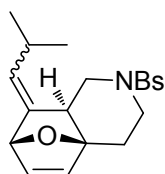

**(4a*S*,7*R*,8a*S*)-2-((4-bromophenyl)sulfonyl)-8-(2-methylpropylidene)-2,3,4,7,8,8a-hexahydro-1*H*-4a,7-epoxyisoquinoline 7f**

A white solid, 33% yield (28 mg). M.p.: 175-178 °C. <sup>1</sup>H NMR (CDCl<sub>3</sub>, TMS, 400 MHz) δ 0.91 (d, *J* = 6.4 Hz, 3H, CH<sub>3</sub>), 0.98 (d, *J* = 6.4 Hz, 3H, CH<sub>3</sub>), 2.18-2.24 (m, 2H, CH<sub>2</sub>), 2.26-2.39 (m, 2H, CH<sub>2</sub>), 2.41-2.52 (m, 2H, CH<sub>2</sub>), 3.75-3.80 (m, 1H, CH<sub>2</sub>), 4.03 (ddd, *J* = 2.0, 6.4, 12.0 Hz, 1H, CH<sub>2</sub>), 4.81 (s, 1H, CH), 5.18 (d, *J* = 10.4 Hz, 1H, =CH), 6.00 (d, *J* = 5.6 Hz, 1H, =CH), 6.43 (d, *J* = 5.6 Hz, 1H, =CH), 7.60 (d, *J* = 8.8 Hz, 2H, ArH), 7.67 (d, *J* = 8.8 Hz, 2H, ArH). <sup>13</sup>C NMR (CDCl<sub>3</sub>, 100 MHz, TMS) δ 22.8, 23.4, 28.4, 29.9, 39.5, 42.8, 48.9, 82.9, 85.1, 127.9, 128.9, 129.8, 132.4, 135.4, 135.8, 136.2, 137.3. IR (CH<sub>2</sub>Cl<sub>2</sub>) ν 2955, 2926, 2859, 1728, 1575, 1352, 1166, 1041, 914, 752, 724, 705 cm<sup>-1</sup>. MS (MALDI) *m/z* (%): 446.0 (100) [M+Na]<sup>+</sup>; HRMS (MALDI) Calcd. for C<sub>19</sub>H<sub>22</sub>NO<sub>3</sub>BrNaS<sup>+</sup>[M+Na]<sup>+</sup> requires 446.0396, Found: 446.0396.

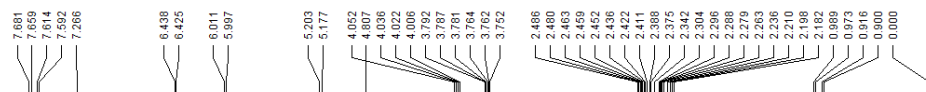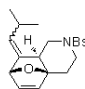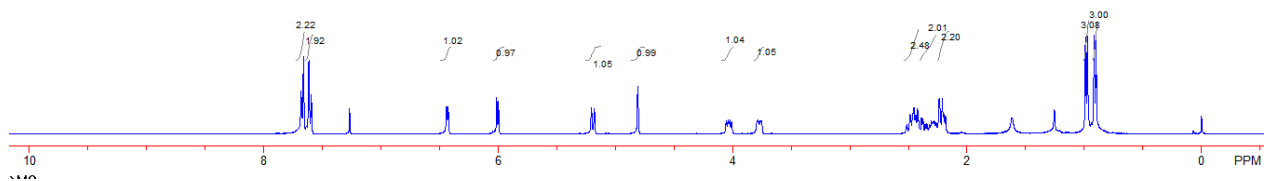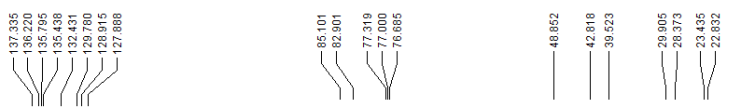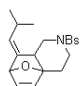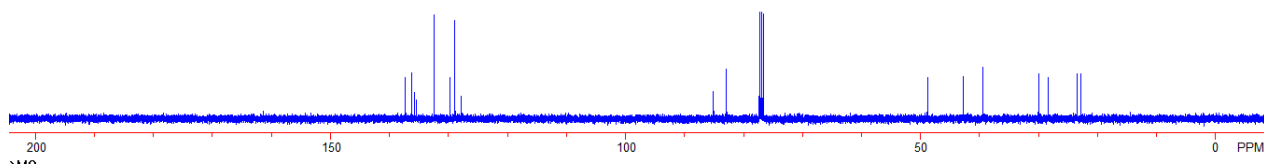

## 7. X-ray crystallographic information of product 2a, 3a and 5a

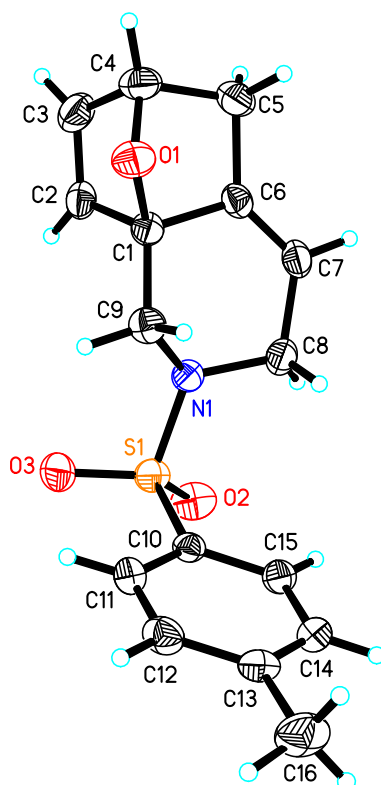

The crystal data of **2a** have been deposited in CCDC with number 999306. Empirical formula:  $C_{16}H_{17}NO_3S$ , Formula weight: 303.36, Temperature: 293(2) K, Crystal system: Triclinic, Space group: P-1, Unit cell dimensions:  $a = 8.3878(16) \text{ \AA}$ ,  $\beta = 76.354(4)^\circ$ ;  $b = 9.8582(18) \text{ \AA}$ ,  $\gamma = 84.421(4)^\circ$ ;  $c = 19.139(3) \text{ \AA}$ ,  $\alpha = 73.985(4)^\circ$ . Volume:  $1477.3(5) \text{ \AA}^3$ ,  $Z = 4$ , Density (calculated):  $1.364 \text{ Mg/m}^3$ ,  $F(000)$ : 640, Crystal size:  $0.211 \times 0.175 \times 0.123 \text{ mm}^3$ , Final R indices [ $I > 2\sigma(I)$ ]:  $R1 = 0.0513$ ,  $wR2 = 0.1322$ .



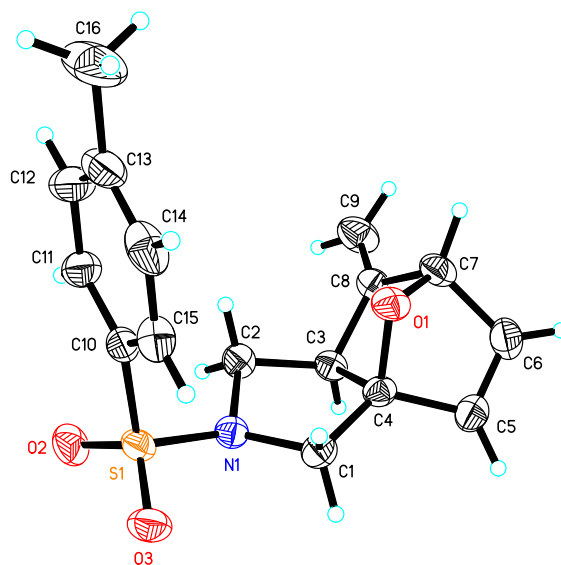

The crystal data of **3a** have been deposited in CCDC with number 995122. Empirical formula:  $C_{16}H_{22}NO_3S$ , Formula weight: 308.40, Temperature: 293(2) K, Crystal system: Triclinic, Space group: P-1, Unit cell dimensions:  $a = 6.2097(13) \text{ \AA}$ ,  $\alpha = 104.782(4)^\circ$ ;  $b = 11.272(2) \text{ \AA}$ ,  $\beta = 101.238(4)^\circ$ ;  $c = 11.547(3) \text{ \AA}$ ,  $\gamma = 100.235(4)^\circ$ . Volume:  $744.2(3) \text{ \AA}^3$ ,  $Z = 2$ , Density (calculated):  $1.376 \text{ Mg/m}^3$ , F(000): 330, Crystal size:  $0.211 \times 0.176 \times 0.123 \text{ mm}^3$ , Final R indices [I > 2 $\sigma$ (I)]: R1 = 0.0656, wR2 = 0.1786.

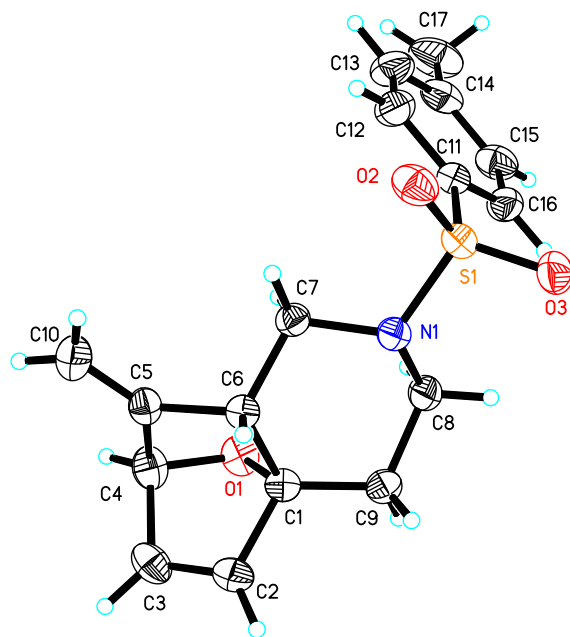

The crystal data of **5a** have been deposited in CCDC with number 1009701. Empirical formula:  $C_{17}H_{19}NO_3S$ , Formula weight: 317.39, Temperature: 293(2) K, Crystal system: Monoclinic, Space group: P 21/c, Unit cell dimensions:  $a = 14.5933(18) \text{ \AA}$ ,  $b = 9.6858(12) \text{ \AA}$ ,  $c = 11.3977(14) \text{ \AA}$ ,  $\alpha = 90^\circ$ ,  $\beta = 92.745(3)^\circ$ ,  $\gamma = 90^\circ$ . Volume:  $1609.2(3) \text{ \AA}^3$ ,  $Z = 4$ , Density (calculated):  $1.310 \text{ Mg/m}^3$ ,  $F(000)$ : 672, Crystal size:  $0.211 \times 0.145 \times 0.112 \text{ mm}^3$ , Final R indices [ $I > 2\sigma(I)$ ]:  $R1 = 0.0432$ ,  $wR2 = 0.1107$ .

## 6. Reference

- [1] Lohse, A. G.; Hsung, R. P. *Org. Lett.* **2009**, *11*, 3403.
- [2] McNelis, B. J.; Sternbach, D. D.; MacPhail, A. T. *Tetrahedron* **1994**, *50*, 6767.
- [3] Celanire, S.; Marlin, F.; Baldwin, J. E.; Adlington, R. M. *Tetrahedron* **2005**, *61*, 3025.
- [4] Padwa, A.; Zanka, A.; Cassidy, M. P.; Harris, J. M. *Tetrahedron* **2003**, *59*, 4939.
- [5] Hashmi, A. S. K.; Schaefer, S.; Bats, J. W.; Frey, W.; Rominger, F. *Eur. J. Org. Chem.* **2008**, *29*, 4891.
- [6] Belen, M. M.; Nevado, C.; Cardenas, D. J.; Echavarren, A. M. *J. Am. Chem. Soc.* **2003**, *125*, 5757.
- [7] Prinzbach, H.; Bingmann, H.; Markert, J.; Fischer, G.; Knothe, L.; Eberbach, W.; Geiger, J. *B. Chem. Ber.* **1986**, *119*, 589.
